# Supplementary material for: Planar and distorted indigo as the core motif in novel chromophoric liquid crystals
Source: Royal Society of Chemistry journal article supplement (doi:10.1039/c5nj01594d), 2015-01-01
Supplement: c5nj01594d1.pdf [file c5nj01594d1.pdf]

## Supporting Information

# Planar and distorted Indigo as core motif in novel chromophoric liquid crystals

Jan H. Porada, Jörg-M. Neudörfl and Dirk Blunk\*

Submitted to New Journal of Chemistry 2015

Universität zu Köln, Institute of Organic Chemistry, Greinstr. 4, 50939 Köln, Germany.

e-Mail: d.blunk@uni-koeln.de; Fax: +49-221-470 3064; Tel: +49-221-470 5213

|                                                                                  |          |
|----------------------------------------------------------------------------------|----------|
| <b>Syntheses and Analytics:</b> .....                                            | <b>3</b> |
| Instruments: .....                                                               | 3        |
| Syntheses of the Boronic Acids: .....                                            | 4        |
| 4-Bromo-3-fluorophenol (26) .....                                                | 4        |
| 1-Bromo-2-fluoro-4-dodecyloxybenzene (27) .....                                  | 4        |
| 2-Fluoro-4-dodecyloxyphenyl boronic acid (6) .....                               | 5        |
| 1-Bromo-4-dodecyloxy-2-methylbenzene (28) .....                                  | 6        |
| 4-Dodecyloxy-2-methylphenyl boronic acid (7) .....                               | 6        |
| Syntheses of the Isatin Derivatives (Type II): .....                             | 7        |
| General procedure A: .....                                                       | 7        |
| 4-(4-(Dodecyloxy)phenyl)indolin-2,3-dione (29) .....                             | 7        |
| 5-(4-Dodecyloxyphenyl)indolin-2,3-dione (30) .....                               | 8        |
| 5-(4-Dodecylphenyl)indolin-2,3-dione (31) .....                                  | 9        |
| 5-(2-Fluoro-4-(dodecyloxy)phenyl)indolin-2,3-dione (32) .....                    | 9        |
| 5-(4-(Dodecyloxy)-2-methylphenyl)indolin-2,3-dione (33) .....                    | 10       |
| 6-(4-(Dodecyloxy)phenyl)indolin-2,3-dione (34) .....                             | 11       |
| 6-(4-Dodecylphenyl)indolin-2,3-dione (35) .....                                  | 12       |
| 6-(2-Fluor-4-(dodecyloxy)phenyl)indolin-2,3-dione (36) .....                     | 12       |
| 6-(4-(Dodecyloxy)-2-methylphenyl)indolin-2,3-dione (37) .....                    | 13       |
| 7-(4-(Dodecyloxy)phenyl)indolin-2,3-dione (38) .....                             | 14       |
| Syntheses of the <i>N,N'</i> -unsubstituted Indigo Derivatives (Type III): ..... | 15       |
| General procedure B: .....                                                       | 15       |
| 4,4'-Bis-(4-(dodecyloxy)phenyl)indigo (8) .....                                  | 15       |
| 5,5'-Bis-(4-(dodecyloxy)phenyl)indigo (9) .....                                  | 16       |
| 5,5'-Bis-(4-dodecylphenyl)indigo (14) .....                                      | 16       |
| 5,5'-Bis-(2-fluoro-4-(dodecyloxy)phenyl)indigo (15) .....                        | 16       |
| 5,5'-Bis-(4-(dodecyloxy)-2-methylphenyl)indigo (16) .....                        | 17       |
| 6,6'-Bis-(4-(dodecyloxy)phenyl)indigo (10) .....                                 | 17       |
| 6,6'-Bis-(4-dodecylphenyl)indigo (20) .....                                      | 17       |
| 6,6'-Bis-(2-fluoro-4-(dodecyloxy)phenyl)indigo (21) .....                        | 18       |
| 6,6'-Bis-(4-(dodecyloxy)-2-methylphenyl)indigo (22) .....                        | 18       |
| 7,7'-Bis-(4-(dodecyloxy)phenyl)indigo (11) .....                                 | 18       |
| Syntheses of the <i>N,N'</i> -diacetylated Indigo Derivates (Type IV): .....     | 19       |

|                                                                                |           |
|--------------------------------------------------------------------------------|-----------|
| General procedure C: .....                                                     | 19        |
| <i>N,N'</i> -Diacetyl-5,5'-bis-(4-(dodecyloxy)phenyl)indigo (12) .....         | 20        |
| <i>N,N'</i> -Diacetyl-5,5'-bis-(4-dodecylphenyl)indigo (17).....               | 20        |
| <i>N,N'</i> -Diacetyl-5,5'-bis-(2-fluoro-4-(dodecyloxy)phenyl)indigo (18)..... | 21        |
| <i>N,N'</i> -Diacetyl-5,5'-bis-(4-(dodecyloxy)-2-methylphenyl)indigo (19)..... | 22        |
| <i>N,N'</i> -Diacetyl-6,6'-bis-(4-(dodecyloxy)phenyl)indigo (13) .....         | 22        |
| <i>N,N'</i> -Diacetyl-6,6'-bis-(4-dodecylphenyl)indigo (23).....               | 23        |
| <i>N,N'</i> -Diacetyl-6,6'-bis-(2-fluoro-4-(dodecyloxy)phenyl)indigo (24)..... | 24        |
| <i>N,N'</i> -Diacetyl-6,6'-bis-(4-(dodecyloxy)-2-methylphenyl)indigo (25)..... | 24        |
| <b>UV-Vis Spectra .....</b>                                                    | <b>26</b> |
| <b>Calculation of the Order Parameter S: .....</b>                             | <b>32</b> |
| <b>Quantum mechanical Calculations (DFT):.....</b>                             | <b>34</b> |
| <b>Calculation of the p-Orbital Alignment Vectors: .....</b>                   | <b>43</b> |
| <b>Complete list of determined angles and distances: .....</b>                 | <b>48</b> |
| <b>Reference: .....</b>                                                        | <b>54</b> |

# Syntheses and Analytics:

## Instruments:

**IR:** Infrared spectra were obtained using a *Perkin-Elmer* Paragon 1000 FTIR spectrometer and are given in  $\text{cm}^{-1}$  units. All samples were measured as ATR on a ZnSe crystal. Signals are characterized by b, broad; w, weak; m, medium; s, strong.

**$^1\text{H-NMR}$ :** The  $^1\text{H-NMR}$  spectra were recorded on *Bruker* AC 300, *Bruker* DPX 300 spectrometers operating at 300 MHz or on a *Bruker* DRX 500 spectrometer operating at 500 MHz. Chemical shifts are reported as  $\delta$  in ppm and the coupling constant, J, in Hz units. In all spectra solvent peaks were used as internal standard. As solvent DMSO- $d_6$  ( $\delta = 2.49$  ppm) or  $\text{CDCl}_3$  ( $\delta = 7.24$  ppm) were used. Splitting patterns are designated as follows: s, singlet; d, doublet; t, triplet; q, quartet; m, multiplet; br, broad.

**$^{13}\text{C-NMR}$ :** The  $^{13}\text{C-NMR}$  spectra were recorded either on a *Bruker* AC 300 spectrometer operating at 75 MHz or on *Bruker* DRX 500 spectrometer instrument operating at 125 MHz.

**$^{19}\text{F-NMR}$ :** The  $^{19}\text{F-NMR}$  spectra were recorded either on a *Bruker* Avance II 300 spectrometer operating at 282 MHz.

**LR-MS:** *Finnigan* MAT Incos 50 Galaxy System.

**HR-MS:** *Finnigan* MAT 900S. EI, 70eV, Peakmatching using Polyfluorocerosine.

**Elemental analysis:** CHN-combustion analyses were measured using an Elementar Vario EL Instrument.

**WAXS:** Magnetic field (1.5 T) oriented samples in home made flatfilm camera, freestanding in an hole sampleholder. Temperature controller from *Lakeshore*. Two dimensional diffraction patterns detected on *Fuji* BAS SR 3000 imaging plates and processed with the X-Ray 1.0 software from the Université Mons Hainaut.

**Single Crystal X-Ray:** The single crystal X-ray analysis for compound **12** was done on a Kappa CCD four-circle diffractometer from *Nonius* with a Mo X-ray source. Compound **23** was measured on an *Agilent* Super-Nova with a Cu X-ray source. The structures were resolved and refined using the SHELX-97 software package. Visual representation, the introduction of dummy atoms and lines as well as the determination of distances and angles was performed using the Diamond 3.0 software of *Crystal Impact*.

## Syntheses of the Boronic Acids:

### 4-Bromo-3-fluorophenol (**26**)

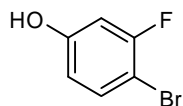

**26**

80 mmol (9.00 g) of 3-fluorophenol have been converted with 81 mmol (12.96 g) bromine according to literature.<sup>[1]</sup> After recrystallisation from petrolether (40-60 °C) 4.01 g (19%) **26** have been yielded as colourless solid.  $R_f=0.38$  (SiO<sub>2</sub>, *c*Hex/EtOAc 3:1); m.p. Cr 71°C I (PE); <sup>1</sup>H NMR (300 MHz, CDCl<sub>3</sub>, 25°C):  $\delta=7.34$  (m, 1H; 5-H), 6.64 (dd, <sup>3</sup> $J_{H,F}=9.7$  Hz, <sup>4</sup> $J=2.8$  Hz, 1H; 2-H), 6.52 (ddd, <sup>3</sup> $J=8.7$  Hz, <sup>4</sup> $J=2.8$  Hz, <sup>5</sup> $J_{H,F}=1.0$  Hz, 1H; 6-H), 5.21 ppm (s, 1H; OH); <sup>13</sup>C NMR (75.5 MHz, CDCl<sub>3</sub>, 25°C):  $\delta=159.38$  (s, <sup>1</sup> $J_{C,F}=246.8$  Hz; C-3), 155.92 (s, <sup>3</sup> $J_{C,F}=10.2$  Hz; C-1), 133.59 (d; C-5), 112.63 (d, <sup>4</sup> $J_{C,F}=2.9$  Hz; C-6), 104.51 (d, <sup>2</sup> $J_{C,F}=25.2$  Hz; C-2), 99.59 ppm (s, <sup>2</sup> $J_{C,F}=21.1$  Hz; C-4); <sup>19</sup>F NMR (282.2 MHz, CDCl<sub>3</sub>, 25°C):  $\delta=-105.04$  ppm (m; 3-F); IR (ATR):  $\tilde{\nu}=3334$  (bw), 1595 (s), 1484 (s), 1442 (s), 1296 (s), 1238 (m), 1215 (m), 1148 (s), 1123 (s), 1042 (m), 961 (s), 839 (m), 799 (m), 735 (m), 607 cm<sup>-1</sup> (s); MS (EI, 70 eV) *m/z* (%): 192 (100) [ $M^+$  for <sup>81</sup>Br], 190 (100) [ $M^+$  for <sup>79</sup>Br], 111 (17) [ $M^+-Br$ ], 83 (80), 57 (28).

### 1-Bromo-2-fluoro-4-dodecyloxybenzene (**27**)

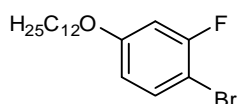

**27**

16 mmol (3.07 g) 4-bromo-3-fluorophenol (**26**), 17 mmol bromododecane (4.00 g) and 20 mmol (0.80 g) NaOH have been dissolved in 15 ml DMSO and heated to 100 °C for 12 hours. After cooling to room temperature the solution has been extracted with MTBE and washed three times with water and dried over magnesium sulphate. The solvent was removed under reduced pressure and the crude product was purified chromatographically (silica gel, *chex*) yielding 5.57 g (97%) **27** as colourless oil.  $R_f=0.75$  (SiO<sub>2</sub>, *c*Hex/EtOAc 3:1);  $n_D^{20}$  1.5013; <sup>1</sup>H NMR (300 MHz, CDCl<sub>3</sub>, 25°C):  $\delta=7.36$  (m, 1H; 6-H), 6.66 (dd, <sup>3</sup> $J_{H,F}=10.5$  Hz, <sup>4</sup> $J=2.8$  Hz, 1H; 3-H), 6.57 (ddd, <sup>3</sup> $J=8.8$  Hz, <sup>4</sup> $J=2.8$  Hz, <sup>5</sup> $J_{H,F}=0.9$  Hz, 1H; 6-H), 3.89 (t <sup>3</sup> $J=6.5$  Hz, 2H;  $\alpha$ -CH<sub>2</sub>); 1.75 (m, 2H;  $\beta$ -CH<sub>2</sub>), 1.48-1.18 (m, 18H; CH<sub>2</sub>), 0.87 ppm (t, <sup>3</sup> $J=6.6$  Hz, 3H; CH<sub>3</sub>); <sup>13</sup>C NMR (75.5 MHz, CDCl<sub>3</sub>, 25°C):  $\delta=159.75$  (s, <sup>3</sup> $J_{C,F}=9.8$  Hz; C-4), 159.43 (s, <sup>1</sup> $J_{C,F}=246.0$  Hz; C-2), 133.19 (d; C-6), 111.82 (d, <sup>4</sup> $J_{C,F}=2.5$  Hz; C-5), 103.25 (d, <sup>2</sup> $J_{C,F}=25.4$  Hz; C-3), 98.88 (s, <sup>2</sup> $J_{C,F}=21.2$  Hz; C-1), 68.60 (t;  $\alpha$ -CH<sub>2</sub>), 31.91, 29.63, 29.57, 29.34 (4 × t; CH<sub>2</sub>), 29.01 (t;  $\beta$ -CH<sub>2</sub>), 25.93 (t;  $\gamma$ -

CH<sub>2</sub>), 22.68 (t; CH<sub>2</sub>), 14.10 ppm (q; CH<sub>3</sub>); <sup>19</sup>F NMR (282.2 MHz, CDCl<sub>3</sub>, 25°C): δ=-105.50 ppm (m; 2-F); IR (ATR):  $\tilde{\nu}$ =2920 (s), 2850 (s), 1603 (m), 1582 (m), 1487 (s), 1465 (m), 1320 (m), 1290 (m), 1260 (m), 1165 (s), 1143 (m), 1051 (w), 1016 (w), 830 (m), 790 (w), 718 (w), 641 cm<sup>-1</sup> (w); MS (EI, 70 eV) m/z (%): 360 (15) [M<sup>+</sup> for <sup>81</sup>Br], 358 (16) [M<sup>+</sup> for <sup>79</sup>Br], 280 (4) [M<sup>+</sup>-Br], 192 (100) [M<sup>+</sup>-C<sub>12</sub>H<sub>25</sub> for <sup>81</sup>Br], 190 (100) [M<sup>+</sup>-C<sub>12</sub>H<sub>25</sub> for <sup>79</sup>Br], 112 (19), 97 (7), 83 (16), 69 (19), 57 (37), 43 (39).

## 2-Fluoro-4-dodecyloxyphenyl boronic acid (6)

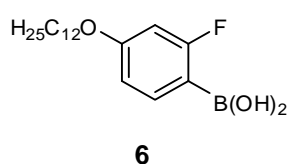

7.7 mmol (2.79 g) of 1-bromo-2-fluoro-4-dodecyloxybenzene (**27**) were dissolved in 35 ml dry THF and cooled to -78 °C. 7.8 mmol (3.1 ml) of a 2.5 molar *n*BuLi solution were added slowly over 90 minutes.

30 minutes after complete addition 21.0 mmol (2.0 ml) trimethylborate were added rapidly and the solution was allowed to reach room temperature. Subsequently 50 ml 2 molar HCl were added and THF was removed under reduced pressure. After addition of ethyl acetate the organic phase was washed twice with water and once with brine and dried over MgSO<sub>4</sub>. The solvent was evaporated and crude product recrystallized from petrolether (40-60 °C) yielding 1.67 g (63%) 2-fluoro-4-dodecyloxyphenyl boronic acid (**6**) as colourless solid. R<sub>f</sub>=0.25 (SiO<sub>2</sub>, *c*Hex/EtOAc 3:1); m.p. Cr 92 °C I (PE); <sup>1</sup>H NMR (300 MHz, CDCl<sub>3</sub>, 25°C): δ=7.70 (m, 1H; 6-H), 6.71 (dd, <sup>3</sup>J=8.4 Hz, <sup>4</sup>J=2.2 Hz, 1H; 5-H), 6.53 (dd, <sup>3</sup>J<sub>H,F</sub>=13.0 Hz, <sup>4</sup>J=2.1 Hz, 1H; 3-H), 3.95 (t <sup>3</sup>J=6.5 Hz, 2H; α-CH<sub>2</sub>); 1.77 (m, 2H; β-CH<sub>2</sub>), 1.48-1.18 (m, 18H; CH<sub>2</sub>), 0.86 ppm (t, <sup>3</sup>J=6.6 Hz, 3H; CH<sub>3</sub>); <sup>13</sup>C NMR (75.5 MHz, CDCl<sub>3</sub>, 25°C): δ=169.04 (s, <sup>1</sup>J<sub>C,F</sub>=255.1 Hz; C-2), 163.43 (s; C-4), 137.47 (d, <sup>3</sup>J<sub>C,F</sub>=9.7 Hz; C-6), 111.02 (d; C-5), 101.31 (d, <sup>2</sup>J<sub>C,F</sub>=29.5 Hz; C-3), 68.38 (t; α-CH<sub>2</sub>), 31.92, 29.64, 29.58, 29.34 (4 × t; CH<sub>2</sub>), 29.03 (t; β-CH<sub>2</sub>), 25.95 (t; γ-CH<sub>2</sub>), 22.69 (t; CH<sub>2</sub>), 14.12 ppm (q; CH<sub>3</sub>);<sup>i</sup> <sup>19</sup>F NMR (282.2, CDCl<sub>3</sub>, 25°C): δ=-107.56 ppm (m; 2-F); IR (ATR):  $\tilde{\nu}$ =3508 (bw), 3351 (bw), 3208 (bw), 2917 (s), 2850 (m), 1621 (s), 1565 (m), 1469 (m), 1429 (m), 1381 (m), 1345 (s), 1289 (m), 1232 (w), 1194 (w), 1147 (m), 1114 (s), 1027 (m), 1004 (m), 956 (w), 933 (w), 837 (m), 784 (m), 725 (m), 647 cm<sup>-1</sup> (m).

<sup>i</sup> The signal for the quarternary C-1 could not be found for **6**.

### 1-Bromo-4-dodecyloxy-2-methylbenzene (**28**)

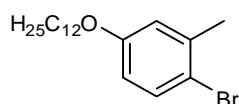

**28**

50 mmol (9.35 g) m-bromocresole, 52 mmol bromododecane (12.2 g) and 60 mmol (2.4 g) NaOH have been dissolved in 50 ml DMSO and heated to 100 °C for 12 hours. After cooling to

room temperature the solution has been extracted with MTBE and washed three times with water and dried over magnesium sulphate. The solvent was removed under reduced pressure and the crude product was purified chromatographically (silica gel, chex) yielding 14.55 g (82%) **28** as colourless oil.  $R_f=0.66$  (SiO<sub>2</sub>, cHex/EtOAc 5:1);  $n_D^{22}$ : 1.5132; <sup>1</sup>H NMR (300 MHz, CDCl<sub>3</sub>, 25°C):  $\delta=7.36$  (d, <sup>3</sup>J=8.7 Hz, 1H; 6-H), 6.77 (d, <sup>4</sup>J=2.9 Hz, 1H; 3-H), 6.59 (dd, <sup>3</sup>J=8.7 Hz, <sup>4</sup>J=3.0 Hz, 1H; 5-H), 3.89 (t, <sup>3</sup>J=6.5 Hz, 2H;  $\alpha$ -CH<sub>2</sub>), 2.35 (s, 3H; 2-CH<sub>3</sub>), 1.75 (m, 2H;  $\beta$ -CH<sub>2</sub>), 1.42 (m, 2H;  $\gamma$ -CH<sub>2</sub>), 1.30-1.20 ppm (m, 16H; CH<sub>2</sub>), 0.88 (t, <sup>3</sup>J=6.6 Hz, 3H; CH<sub>3</sub>); <sup>13</sup>C NMR (75.5 MHz, CDCl<sub>3</sub>, 25°C):  $\delta=158.34$  (s; C-4), 138.65 (s; C-2), 132.70 (d; C-6), 117.10 (d; C-3), 115.11 (s; C-1), 113.44 (d; C-5), 68.14 (t;  $\alpha$ -CH<sub>2</sub>), 31.91, 29.65, 29.38, 29.35 (4 × t; CH<sub>2</sub>), 29.22 (t;  $\beta$ -CH<sub>2</sub>), 26.01 (t;  $\gamma$ -CH<sub>2</sub>), 23.09 (q; C-3-CH<sub>3</sub>), 22.69 (t; CH<sub>2</sub>), 14.11 ppm (q; CH<sub>3</sub>); IR (ATR):  $\tilde{\nu}=2919$  (s), 2850 (s), 1588 (w), 1571 (m), 1466 (s), 1377 (m), 1306 (s), 1288 (s), 1237 (s), 1170 (s), 1142 (m), 1126 (m), 1051 (m), 1022 (s), 861 (m), 840 (m), 794 (m), 720 (w), 962 (w), 636 cm<sup>-1</sup> (m); MS (EI, 70 eV) m/z (%): 356 (39) [ $M^+$  for <sup>81</sup>Br], 354 (40) [ $M^+$  for <sup>79</sup>Br], 276 (36) [ $M^+$ -Br], 188 (100) [ $M^+$ -C<sub>12</sub>H<sub>25</sub> for <sup>81</sup>Br], 186 (100) [ $M^+$ -C<sub>12</sub>H<sub>25</sub> for <sup>79</sup>Br], 108 (14) [ $M^+$ -C<sub>12</sub>H<sub>25</sub> -Br]; elemental analysis calcd (%) for C<sub>19</sub>H<sub>31</sub>BrO: C 64.22, H 8.79, found: C 64.60, H 8.87.

### 4-Dodecyloxy-2-methylphenyl boronic acid (**7**)

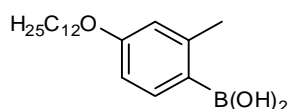

**7**

40 mmol (14.2 g) 1-bromo-4-dodecyloxy-2-methylbenzene (**28**) were dissolved in 200 ml dry THF and cooled to -78 °C. 42 mmol (16.8 ml) of a 2.5 molar *n*BuLi solution were added slowly over 90 minutes. 30 minutes after complete addition 120.0 mmol (11.4 ml)

trimethylborate were added rapidly and the solution was allowed to reach room temperature. Subsequently 100 ml 2 molar HCl were added and THF was removed under reduced pressure. After addition of ethyl acetate the organic phase was washed twice with water and once with brine and dried over MgSO<sub>4</sub>. The solvent was evaporated and crude product recrystallized from petrolether (40-60 °C) yielding 11.38 g (89%) 4-dodecyloxy-2-methylphenyl boronic

acid (**7**) as colourless solid.  $R_f=0.61$  ( $\text{SiO}_2$ , EtOAc); m.p. Cr 67 °C I (PE);  $^1\text{H}$  NMR (300 MHz,  $\text{CDCl}_3$ , 25°C):  $\delta=8.13$  (d,  $^3J=8.1$  Hz, 1H; 6-H), 6.78 (m, 2H; 3-H and 5-H), 3.89 (t,  $^3J=4.0$  Hz, 2H;  $\alpha\text{-CH}_2$ ), 2.77 (s, 3H; 2- $\text{CH}_3$ ), 1.78 (m, 2H;  $\beta\text{-CH}_2$ ), 1.41 (m, 2H;  $\gamma\text{-CH}_2$ ), 1.30-1.20 (m, 16H;  $\text{CH}_2$ ), 0.89 ppm (t,  $^3J=6.6$  Hz, 3H;  $\text{CH}_3$ );  $^{13}\text{C}$  NMR (75.5 MHz,  $\text{CDCl}_3$ , 25°C):  $\delta=162.17$  (s; C-4), 148.51 (s; C-2), 139.30 (d; C-6), 116.77 (d; C-3), 110.85 (d, C-5), 67.71 (t;  $\alpha\text{-CH}_2$ ), 31.93, 29.62, 29.42, 29.37 (4 × t;  $\text{CH}_2$ ), 29.26 (t;  $\beta\text{-CH}_2$ ), 26.05 (t;  $\gamma\text{-CH}_2$ ), 23.35 (q; C-3- $\text{CH}_3$ ), 22.70 (t;  $\text{CH}_2$ ), 14.12 ppm (q;  $\text{CH}_3$ );<sup>ii</sup> IR (ATR):  $\tilde{\nu}=3744$  (w), 2917 (s), 2859 (s), 1600 (s), 1558 (m), 1469 (m), 1418 (m), 1341 (s), 1282 (s), 1236 (s), 1174 (m), 1126 (m), 1034 (m), 810 (m), 688 (m), 613  $\text{cm}^{-1}$  (m).

## Syntheses of the Isatin Derivatives (Type II):

### General procedure A:

To a 0.12 molar solution of the respective regioisomer of bromoisatin in dry DME 1.1-1.2 eq. of the boronic acid and 2 mol% tetrakis(triphenylphosphin) palladium(0) were added and the slurry was heated to 90 °C under argon atmosphere. After complete solvation 2 eq. of a degassed aqueous 1 molar potassium phosphate solution was added and the solution was stirred for 7 hours before it was given on a 0.5 molar hydrochloric acid/ice mixture. After 12 hours the product was obtained as dark red precipitate, filtered, dried and purified chromatographically (silica gel, DCM/MTBE 15:1).

### 4-(4-(Dodecyloxy)phenyl)indolin-2,3-dione (**29**)

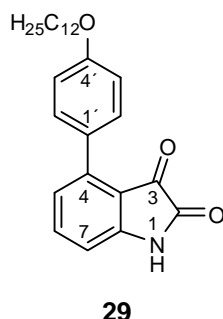

4.0 mmol (0.904 g) 4-bromoisatin and 4.6 mmol (1.408 g) of the boronic acid **5** have been converted and purified according to general procedure A yielding 0.383 g (24%) **29** as a orange solid.  $R_f=0.29$  ( $\text{SiO}_2$ , DCM/MTBE 15:1); m.p. Cr 170.8 °C (28.7 kJ/mol) I (DCM/MTBE 15:1);  $^1\text{H}$  NMR

(300 MHz, DMSO, 25°C):  $\delta=11.09$  (s, 1H; 1-H), 7.56 (t,  $^3J=7.9$  Hz, 1H; 6-H), 7.49 (d,  $^3J=8.7$  Hz, 2H; 2'-H and 6'-H), 6.98 (d,  $^3J=7.0$  Hz, 1H; 5-H), 6.97 (d,  $^3J=8.9$  Hz, 2H; 3'-H and 5'-

<sup>ii</sup> The signal for the quaternary C-1 could not be found for **7**.

H), 6.82 (d,  $^3J=7.8$  Hz, 1H; 7-H), 4.01 (t,  $^3J=6.4$  Hz, 2H;  $\alpha$ -CH<sub>2</sub>), 1.77-1.68 (m, 2H;  $\beta$ -CH<sub>2</sub>), 1.49-1.39 (m, 2H;  $\gamma$ -CH<sub>2</sub>), 1.25 (s, 16H; CH<sub>2</sub>), 0.85 ppm (t,  $^3J=6.5$  Hz, 3H; CH<sub>3</sub>); <sup>13</sup>C NMR (75.5 MHz, DMSO, 25°C):  $\delta=182.87$  (s; C-3), 159.16 (s; C-4'), 158.98 (s; C-2), 151.36 (s; C-7a), 141.42 (s; C-4), 137.67 (d; C-6), 130.19 (d; C-2' and C-6'), 128.24 (s; C-1'), 123.98 (d; C-5), 113.81 (two signals: s; C-3a; d; C-3' and C-5'), 110.28 (d; C-7), 67.41 (t;  $\alpha$ -CH<sub>2</sub>), 31.21, 28.93, 28.81, 28.69, 28.63, 28.59 (6  $\times$  t; CH<sub>2</sub>), 25.44 (t;  $\gamma$ -CH<sub>2</sub>), 22.01 (t; CH<sub>2</sub>), 13.85 ppm (q; CH<sub>3</sub>); IR (ATR):  $\tilde{\nu}=3209$  (bw), 2916 (m), 2849 (m), 1720 (s), 1613 (s), 1584 (s), 1568 (m), 1514 (w), 1485 (w), 1469 (w), 1296 (w), 1249 (m), 1181 (w), 1102 (w), 910 (w), 797 (w), 729 (w), 628 cm<sup>-1</sup> (w); UV/Vis (EtOH, 10 mg/L)  $\lambda_{\max}$ : 247 (s), 368 nm (w); MS (EI, 70 eV) m/z (%): 407 (29) [ $M^+$ ], 239 (54) [ $M^+$ -C<sub>12</sub>H<sub>25</sub>], 211 (100) [ $M^+$ -C<sub>12</sub>H<sub>25</sub>, -CO], 184 (10) [ $M^+$ -C<sub>12</sub>H<sub>25</sub>, -2CO], 168 (7), 154 (4), 139 (7), 127 (6), 83 (6), 69 (14), 57 (21), 55 (29); HRMS (EI, 70 eV): calcd for C<sub>26</sub>H<sub>33</sub>NO<sub>3</sub> [ $M^+$ ]: 407.2461, found: 407.246; elemental analysis calcd (%) for C<sub>26</sub>H<sub>33</sub>NO<sub>3</sub>: C 76.62, H 8.16, N 3.44, found: C 76.25, H 8.23, N 3.29.

### 5-(4-Dodecyloxyphenyl)indolin-2,3-dione (30)

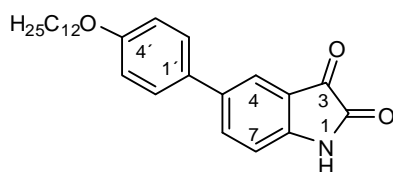

**30**

2.0 mmol (0.452 g) 5-bromoisatin and 2.4 mmol (0.735 g) of the boronic acid **5** have been converted and purified according to general procedure A yielding 0.556 g (68%) **30** as a orange solid.  $R_f=0.32$  (SiO<sub>2</sub>,

DCM/MTBE 15:1); m.p. Cr 104.9 (8.1) SC 162.7 (17.0) SmA 173.7 °C (1.1 kJ/mol) I (DCM/MTBE 15:1); <sup>1</sup>H NMR (300 MHz, DMSO, 25°C):  $\delta=11.00$  (s, 1H; NH), 7.83 (dd,  $^3J=8.2$  Hz,  $^4J=1.8$  Hz, 1H; 6-H), 7.68 (d,  $^4J=1.7$  Hz, 1H; 4-H), 7.55 (d,  $^3J=8.7$  Hz, 2H; 2'-H and 6'-H), 6.99 (d,  $^3J=8.8$  Hz, 2H; 3'-H and 5'-H), 6.98 (d,  $^3J=8.0$  Hz, 1H; 7-H), 4.00 (t,  $^3J=6.5$  Hz, 2H;  $\alpha$ -CH<sub>2</sub>), 1.77-1.67 (m, 2H;  $\beta$ -CH<sub>2</sub>), 1.45-1.20 (m, 18H; CH<sub>2</sub>), 0.85 ppm (t,  $^3J=6.5$  Hz, 3H; CH<sub>3</sub>); <sup>13</sup>C NMR (75.5 MHz, DMSO, 25°C):  $\delta=184.03$  (s; C-3), 159.15 (s; C-2), 158.13 (s; C-4'), 149.09 (s; C-7a), 135.66 (d; C-6), 134.59 (s; C-5), 130.72 (s; C-1'), 127.00 (d; C-2' and C-6'), 121.54 (d; C-4), 118.02 (s; C-3a), 114.72 (d; C-3' and C-5'), 112.33 (d; C-7), 67.36 (t;  $\alpha$ -CH<sub>2</sub>), 30.93, 28.61, 28.38 (3  $\times$  t; CH<sub>2</sub>), 28.31 (t;  $\beta$ -CH<sub>2</sub>), 25.15 (t;  $\gamma$ -CH<sub>2</sub>), 21.70 (t; CH<sub>2</sub>), 13.51 ppm (q; CH<sub>3</sub>); IR (ATR):  $\tilde{\nu}=3206$  (bm), 2914 (s), 2848 (s), 1751 (s), 1717 (s), 1627 (s), 1573 (w), 1521 (w), 1473 (s), 1394 (w), 1308 (m), 1259 (s), 1214 (s), 1185 (m), 1127 (w), 1115 (w), 1035 (w), 969 (w), 894 (w), 821 (m), 755 (w), 718 (m), 660 cm<sup>-1</sup> (w); UV/Vis (EtOH, 10 mg/L)  $\lambda_{\max}$ : 270 (s), 457 nm (w); MS (EI, 70 eV) m/z (%): 407 (41) [ $M^+$ ],



379 (13) [ $M^+$ -CO], 239 (28) [ $M^+$ -C<sub>12</sub>H<sub>25</sub>], 211 (100) [ $M^+$ -C<sub>12</sub>H<sub>25</sub>, -CO], 183 (39) [ $M^+$ -C<sub>12</sub>H<sub>25</sub>, -2CO], 154 (7), 139 (7), 127 (9), 97 (3), 83 (8), 69 (18), 57 (28), 55 (34); HRMS (EI, 70 eV): calcd for C<sub>26</sub>H<sub>33</sub>N O<sub>3</sub> [ $M^+$ ]: 407.2461, found: 407.246; elemental analysis calcd (%) for C<sub>26</sub>H<sub>33</sub>NO<sub>3</sub>: C 76.62, H 8.16, N 3.44, found: C 76.64, H 8.32, N 3.33.

### 5-(4-Dodecylphenyl)indolin-2,3-dione (31)

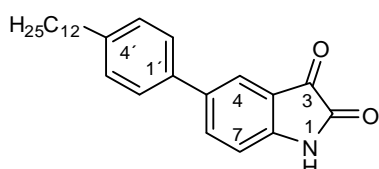

**31**

4.0 mmol (0.904 g) 5-bromoisatin and 4.2 mmol (1.219 g) of the boronic acid **4** have been converted and purified according to general procedure A yielding 0.527 g (34%)

**31** as a orange solid.  $R_f=0.26$  (SiO<sub>2</sub>,

DCM/MTBE 15:1); m.p. Cr 159.6 °C (21.0 kJ/mol) I (DCM/MTBE 15:1); <sup>1</sup>H NMR (300 MHz, CDCl<sub>3</sub>, 25°C):  $\delta=8.41$  (s, 1H; NH), 7.81 (s, 1H; 4-H), 7.77 (dd, <sup>3</sup> $J=8.2$  Hz, <sup>4</sup> $J=1.8$  Hz, 1H; 6-H), 7.42 (d, <sup>3</sup> $J=8.1$  Hz, 2H; 2'-H and 6'-H), 7.24 (d, <sup>3</sup> $J=7.9$  Hz, 2H; 3'-H and 5'-H), 6.99 (d, <sup>3</sup> $J=8.1$  Hz, 1H; 7-H), 2.62 (t, <sup>3</sup> $J=7.6$  Hz, 2H;  $\alpha$ -CH<sub>2</sub>), 1.61 (m, 2H;  $\beta$ -CH<sub>2</sub>), 1.35 - 1.21 (m, 18H; CH<sub>2</sub>), 0.86 ppm (t, <sup>3</sup> $J=6.5$  Hz, 3H; CH<sub>3</sub>); <sup>13</sup>C NMR (75.5 MHz, CDCl<sub>3</sub>, 25°C):  $\delta=183.07$  (s; C-3), 159.46 (s; C-2), 147.81 (s; C-7a), 142.96 (s; C-4'), 137.65 (s; C-5), 137.03 (d; C-6), 136.18 (s; C-1'), 129.11 (d; C-3' and C-5'), 126.38 (d; C-2' and C-6'), 123.99 (d; C-4), 118.51 (s; C-3a), 112.61 (d; C-7), 35.57 (t;  $\alpha$ -CH<sub>2</sub>), 31.91, 31.44, 29.65, 29.58, 29.50, 29.33, 22.68 (7  $\times$  t; CH<sub>2</sub>), 14.12 ppm (q; CH<sub>3</sub>); IR (ATR):  $\tilde{\nu}=3200$  (bm), 2914 (s), 2847 (m), 1750 (s), 1720 (s), 1616 (m), 1478 (m), 1307 (m), 1260 (w), 1200 (w), 1120 (w), 1013 (w), 963 (w), 838 (m), 813 (w), 746 (w), 717 cm<sup>-1</sup> (w); UV/Vis (EtOH, 10 mg/L)  $\lambda_{max}$ : 212 (m), 263 (s), 448 nm (w); MS (EI, 70 eV)  $m/z$  (%): 391 (82) [ $M^+$ ], 363 (100) [ $M^+$ -CO], 335 (4), 236 (18) [ $M^+$ -C<sub>11</sub>H<sub>23</sub>], 222 (8), 208 (73) [ $M^+$ -CO -C<sub>11</sub>H<sub>23</sub>], 193 (6), 180 (53) [ $M^+$ -2CO -C<sub>11</sub>H<sub>23</sub>], 165 (12), 152 (18), 139 (5), 127 (3), 115 (5), 57 (7); HRMS (EI, 70 eV): calcd for C<sub>26</sub>H<sub>33</sub>NO<sub>2</sub> [ $M^+$ ]: 391.251, found: 391.251; elemental analysis calcd (%) for C<sub>26</sub>H<sub>33</sub>NO<sub>2</sub>: C 79.76, H 8.50, N 3.58, found: C 79.76, H 8.60, N 3.46.

### 5-(2-Fluoro-4-(dodecyloxy)phenyl)indolin-2,3-dione (32)

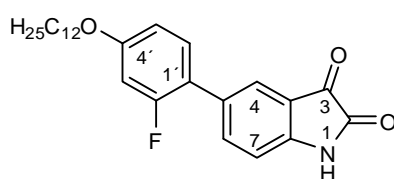

**32**

3.0 mmol (0.678 g) 5-bromoisatin and 3.3 mmol (1.070 g) of the boronic acid **6** have been converted and purified according to general procedure A yielding 0.904 g (71%)

**32** as a red solid.  $R_f=0.27$  (SiO<sub>2</sub>, DCM/MTBE 15:1); m.p. Cr 92.8 (31.7) Cr<sub>2</sub> 150.6 °C (26.2 kJ/mol) I (DCM/MTBE 15:1); <sup>1</sup>H NMR (300 MHz, DMSO, 25°C): δ=11.21 (s, 1H; NH), 7.70 (d, <sup>3</sup>J=8.2 Hz, 1H; 6-H), 7.56 (s, 1H; 4-H), 7.42 (m, 1H; 6'-H), 7.01 (d, <sup>3</sup>J=8.2 Hz, 1H; 7-H), 6.90 (dd, <sup>3</sup>J<sub>H,F</sub>=13.2 Hz, <sup>4</sup>J=2.3 Hz, 1H; 3'-H), 6.84 (dd, <sup>3</sup>J=8.6 Hz, <sup>4</sup>J=2.3 Hz, 1H; 5'-H), 4.00 (t, <sup>3</sup>J=6.4 Hz, 2H; α-CH<sub>2</sub>), 1.70 (m, 2H; β-CH<sub>2</sub>), 1.40 (m, 2H; γ-CH<sub>2</sub>), 1.35-1.18 (m, 16H; CH<sub>2</sub>), 0.84 ppm (t, <sup>3</sup>J=6.5 Hz, 3H; CH<sub>3</sub>); <sup>13</sup>C NMR (75.5 MHz, DMSO, 25°C): δ=184.17 (s; C-3), 159.46 (s, <sup>1</sup>J<sub>C,F</sub>=245.2 Hz; C-2'), 159.46 (s, <sup>3</sup>J<sub>C,F</sub>=11.5 Hz; C-4'), 159.35 (s; C-2), 149.62 (s; C-7a), 138.07 (d; C-6), 130.54 (d, <sup>3</sup>J<sub>C,F</sub>=4.7 Hz; C-6'), 129.45 (s; C-5), 124.08 (d; C-4), 118.68 (s, <sup>2</sup>J<sub>C,F</sub>=12.9 Hz; C-1'), 117.95 (s; C-3a), 112.34 (d; C-7), 111.31 (d; C-5'), 102.35 (s, <sup>2</sup>J<sub>C,F</sub>=26.3 Hz; C-3'), 67.95 (t; α-CH<sub>2</sub>), 31.20, 28.89, 28.62 (3 × t; CH<sub>2</sub>), 28.40 (t; β-CH<sub>2</sub>), 25.32 (t; γ-CH<sub>2</sub>), 22.00 (t; CH<sub>2</sub>), 13.84 ppm (q; CH<sub>3</sub>); <sup>19</sup>F NMR (282.2 MHz, DMSO, 25°C): δ=-116.19 ppm (m; 2'-F); IR (ATR):  $\tilde{\nu}$ =3221 (bw), 2915 (s), 2846 (m), 1772 (m), 1724 (s), 1622 (s), 1575 (w), 1479 (m), 1395 (w), 1292 (m), 1156 (m), 1129 (m), 1034 (w), 899 (w), 843 (m), 830 (m), 746 (w), 713 cm<sup>-1</sup> (w); UV/Vis (EtOH, 10 mg/L)  $\lambda_{max}$ : 268 (s), 455 nm (w); MS (EI, 70 eV) m/z (%): 425 (39) [M<sup>+</sup>], 397 (27) [M<sup>+</sup>-CO], 257 (21) [M<sup>+</sup>-C<sub>12</sub>H<sub>25</sub>], 229 (100) [M<sup>+</sup>-C<sub>12</sub>H<sub>25</sub>-CO], 201 (37) [M<sup>+</sup>-C<sub>12</sub>H<sub>25</sub>-2CO]; HRMS (EI, 70 eV): calcd for C<sub>26</sub>H<sub>32</sub>FNO<sub>3</sub> [M<sup>+</sup>]: 425.2366, found: 425.236; elemental analysis calcd (%) for C<sub>26</sub>H<sub>32</sub>FNO<sub>3</sub>: C 73.38, H 7.58, N 3.29, found: C 73.11, H 7.75, N 3.44.

### 5-(4-(Dodecyloxy)-2-methylphenyl)indolin-2,3-dione (**33**)

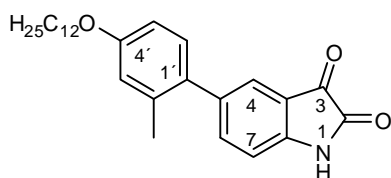

**33**

5.0 mmol (1.130 g) 5-bromoisatin and 5.5 mmol (1.953 g) of the boronic acid **7** have been converted and purified according to general procedure A yielding 1.201 g (57%)

**33** as a orange solid.  $R_f=0.30$  (SiO<sub>2</sub>, DCM/MTBE 15:1); m.p. Cr 120.4 (8.0) Cr<sub>2</sub> 158.8 °C (22.5 kJ/mol) I (DCM/MTBE 15:1); <sup>1</sup>H NMR (300 MHz, CDCl<sub>3</sub>, 25°C): δ=9.06 (s, 1H; NH), 7.52 (s, 1H; 4-H), 7.48 (d, <sup>3</sup>J=8.1 Hz, 1H; 6-H), 7.06 (d, <sup>3</sup>J=8.3 Hz, 1H; 6'-H), 7.02 (d, <sup>3</sup>J=8.0 Hz, 1H; 7-H), 6.79 (s, 1H; 3'-H), 6.76 (d, <sup>3</sup>J=8.4 Hz, 1H; 5'-H), 3.96 (t, <sup>3</sup>J=6.5 Hz, 2H; α-CH<sub>2</sub>), 2.22 (s, 3H; 2'-CH<sub>3</sub>), 1.78 (m, 2H; β-CH<sub>2</sub>), 1.50-1.10 (m, 18H; CH<sub>2</sub>), 0.86 ppm (t, <sup>3</sup>J=6.4 Hz, 3H; alkyl-CH<sub>3</sub>); <sup>13</sup>C NMR (75.5 MHz, CDCl<sub>3</sub>, 25°C): δ=183.46 (s; C-3), 159.96 (s; C-2), 158.78 (s; C-4'), 147.82 (s; C-7a), 139.68 (d; C-6), 137.93 (s; C-5), 136.51 (s; C-2'), 131.89 (s; C-1'), 130.52 (d; C-6'), 126.31 (d; C-4), 117.83 (s; C-3a), 116.56 (d; C-3'), 112.34 (d; C-7), 111.95 (d; C-5'), 67.99 (t; α-CH<sub>2</sub>), 31.89, 29.58, 29.37, 29.33 (4 × t; CH<sub>2</sub>), 29.27 (t; β-CH<sub>2</sub>), 26.03 (t; γ-CH<sub>2</sub>), 22.67 (t; CH<sub>2</sub>), 20.64 (q; C-2'-CH<sub>3</sub>), 14.10 ppm (q;

alkyl-CH<sub>3</sub>); IR (ATR):  $\tilde{\nu}$ =3288 (bw), 2915 (s), 2849 (m), 1759 (m), 1739 (s), 1711 (s), 1617 (s), 1568 (w), 1472 (s), 1394 (w), 1364 (w), 1289 (m), 1232 (m), 1197 (m), 1170 (m), 1120 (m), 1052 (w), 964 (w), 905 (w), 861 (w), 851 (m), 789 (w), 750 (w), 716 (w), 650 cm<sup>-1</sup> (w); UV/Vis (EtOH, 10 mg/L)  $\lambda_{\text{max}}$ : 215 (m), 255 (s), 437 nm (w); MS (EI, 70 eV) m/z (%): 421 (27) [ $M^+$ ], 393 (7) [ $M^+$ -CO], 253 (23) [ $M^+$ -C<sub>12</sub>H<sub>25</sub>], 225 (100) [ $M^+$ -CO -C<sub>12</sub>H<sub>25</sub>], 196 (12) [ $M^+$ -2CO -C<sub>12</sub>H<sub>25</sub>], 180 (5), 170 (11), 141 (6), 115 (6), 55 (10); HRMS (EI, 70 eV): calcd for C<sub>27</sub>H<sub>35</sub>NO<sub>3</sub> [ $M^+$ ]: 421.2617, found: 421.261; elemental analysis calcd (%) for C<sub>27</sub>H<sub>35</sub>NO<sub>3</sub>: C 76.92, H 8.37, N 3.32, found: C 76.79, H 8.41, N 3.22.

### 6-(4-(Dodecyloxy)phenyl)indolin-2,3-dione (34)

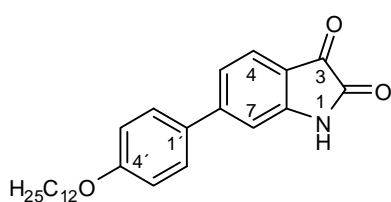

**34**

3.0 mmol (0.678 g) 6-bromoisatin and 3.5 mmol (1.058 g) of the boronic acid **5** have been converted and purified according to general procedure A yielding 1.041 g (85%)

**34** as a orange solid.  $R_f=0.42$  (SiO<sub>2</sub>,

DCM/MTBE 15:1); m.p. Cr 156.0 °C (23.9 kJ/mol) I (DCM/MTBE 15:1); <sup>1</sup>H NMR (300 MHz, DMSO, 25°C):  $\delta$ =11.09 (s; 1H, 1-H), 7.66 (d, <sup>3</sup>J=8.8 Hz, 2H; 2'-H and 6'-H), 7.54 (d, <sup>3</sup>J=7.9 Hz, 1H; 4-H), 7.32 (dd, <sup>3</sup>J=7.9 Hz, <sup>4</sup>J=1.3 Hz, 1H; 5-H), 7.06 (s, 1H; 7-H), 7.05 (d, <sup>3</sup>J=8.8 Hz, 2H; 3'-H and 5'-H), 4.02 (t, <sup>3</sup>J=6.4 Hz, 2H;  $\alpha$ -CH<sub>2</sub>), 1.76-1.67 (m, 2H;  $\beta$ -CH<sub>2</sub>), 1.47-1.37 (m, 2H;  $\gamma$ -CH<sub>2</sub>), 1.24 (s, 16H; CH<sub>2</sub>), 0.84 ppm (t, <sup>3</sup>J=6.6 Hz, 3H; CH<sub>3</sub>); <sup>13</sup>C NMR (75.5 MHz, DMSO, 25°C):  $\delta$ =183.56 (s; C-3), 159.85 (s; C-2), 159.63 (s; C-4'), 151.39 (s; C-7a), 149.52 (s; C-6), 130.71 (s; C-1'), 128.31 (d; C-2' and C-6'), 125.26 (d; C-4), 120.45 (d; C-5), 116.03 (s; C-3a), 114.98 (d; C-3' and C-5'), 109.13 (d; C-7), 67.53 (t;  $\alpha$ -CH<sub>2</sub>), 31.21, 28.90, 28.63 (3  $\times$  t; CH<sub>2</sub>), 28.51 (t;  $\beta$ -CH<sub>2</sub>), 25.38 (t;  $\gamma$ -CH<sub>2</sub>), 22.01 (t; CH<sub>2</sub>), 13.86 ppm (q; CH<sub>3</sub>); IR (ATR):  $\tilde{\nu}$ =3275 (bm), 2914 (s), 2850 (m), 1764 (s), 1729 (s), 1715 (s), 1620 (s), 1516 (w), 1470 (m), 1446 (m), 1413 (w), 1337 (m), 1292 (w), 1244 (m), 1174 (s), 1105 (m), 1043 (w), 1021 (w), 953 (w), 893 (w), 824 (m), 796 (m), 787 (w), 730 (w), 653 (m), 626 cm<sup>-1</sup> (w); UV/Vis (EtOH, 10 mg/L)  $\lambda_{\text{max}}$ : 220 (s), 253 (s), 358 nm (m); MS (EI, 70 eV) m/z (%): 407 (29) [ $M^+$ ], 239 (34) [ $M^+$ -C<sub>12</sub>H<sub>25</sub>], 211 (100) [ $M^+$ -C<sub>12</sub>H<sub>25</sub>, -CO], 184 (14) [ $M^+$ -C<sub>12</sub>H<sub>25</sub>, -2CO], 168 (3), 155 (5), 139 (5), 127 (4), 83 (7), 69 (16), 57 (28), 55 (32); HRMS (EI, 70 eV): calcd for C<sub>26</sub>H<sub>33</sub>NO<sub>3</sub> [ $M^+$ ]: 407.2461, found: 407.246; elemental analysis calcd (%) for C<sub>26</sub>H<sub>33</sub>NO<sub>3</sub>: C 76.62, H 8.16, N 3.44, found: C 76.17, H 8.17, N 3.27.

### 6-(4-Dodecylphenyl)indolin-2,3-dione (35)

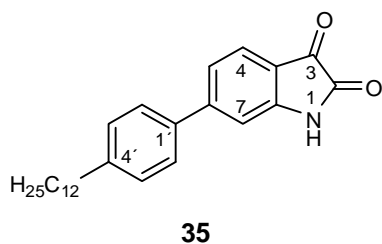

4.0 mmol (0.904 g) 6-bromoisatin and 4.5 mmol (1.306 g) of the boronic acid **4** have been converted and purified according to general procedure A yielding 0.798 g (51%) **35** as a orange solid.  $R_f=0.35$  ( $\text{SiO}_2$ , DCM/MTBE=15:1); m.p. Cr 137 °C I (DCM/MTBE 15:1);  $^1\text{H}$  NMR (300 MHz,  $\text{CDCl}_3$ , 25°C):  $\delta=8.62$  (s, 1H, 1-H), 7.64 (d,  $^3J=7.9$  Hz, 1H; 4-H), 7.52 (d,  $^3J=8.0$  Hz, 2H; 2'-H and 6'-H), 7.31 (d,  $^3J=9.7$  Hz, 1H; 5-H), 7.28 (d,  $^3J=8.3$  Hz, 2H; 3'-H and 5'-H), 7.14 (s, 1H; 7-H), 2.64 (t,  $^3J=7.6$  Hz, 2H;  $\alpha\text{-CH}_2$ ), 1.63 (m, 2H;  $\beta\text{-CH}_2$ ), 1.38-1.18 (m, 18H;  $\text{CH}_2$ ), 0.86 ppm (t,  $^3J=6.5$  Hz, 3H;  $\text{CH}_3$ );  $^{13}\text{C}$  NMR (75.5 MHz,  $\text{CDCl}_3$ , 25°C):  $\delta=182.16$  (s; C-3), 160.14 (s; C-2), 151.96 (s; C-7a), 149.75 (s; C-6), 144.80 (s; C-4'), 136.39 (s; C-1'), 129.23 (d; C-3' and C-5'), 127.11 (d; C-2' and C-6'), 126.22 (d; C-4), 122.56 (d; C-5), 116.62 (s; C-3a), 110.61 (d; C-7), 35.70 (t;  $\alpha\text{-CH}_2$ ), 31.91, 31.34, 29.65, 29.58, 29.49, 29.34, 22.68 (7  $\times$  t;  $\text{CH}_2$ ), 14.12 ppm (q;  $\text{CH}_3$ ); IR (ATR):  $\bar{\nu}=3210$  (bw), 2915 (m), 2848 (m), 1748 (m), 1730 (s), 1622 (s), 1470 (w), 1444 (w), 1409 (w), 1340 (w), 1269 (w), 1176 (w), 1109 (w), 947 (w), 837 (w), 812 (w), 798 (w), 783 (w), 729 (m), 667 (w), 625  $\text{cm}^{-1}$  (w); UV/Vis (EtOH, 10 mg/L)  $\lambda_{\text{max}}$ : 217 (s), 251 (s), 339 nm (m); MS (EI, 70 eV)  $m/z$  (%): 391 (37) [ $M^+$ ], 363 (38) [ $M^+ - \text{CO}$ ], 348 (5), 334 (8), 320 (9), 306 (11), 292 (8), 278 (8), 264 (9), 250 (6), 236 (45) [ $M^+ - \text{C}_{11}\text{H}_{23}$ ], 222 (100) [ $M^+ - \text{C}_{12}\text{H}_{25}$ ], 209 (77) [ $M^+ - \text{CO} - \text{C}_{11}\text{H}_{23}$ ], 195 (12), 181 (93) [ $M^+ - 2\text{CO} - \text{C}_{11}\text{H}_{23}$ ], 165 (18), 152 (32), 139 (7), 127 (6), 115 (9), 57 (17); HRMS (EI, 70 eV): calcd for  $\text{C}_{26}\text{H}_{33}\text{NO}_2$  [ $M^+$ ]: 391.2511, found: 391.251; elemental analysis calcd (%) for  $\text{C}_{26}\text{H}_{33}\text{NO}_2$ : C 79.76, H 8.50, N 3.58, found: C 79.73, H 8.51, N 3.46.

### 6-(2-Fluor-4-(dodecyloxy)phenyl)indolin-2,3-dione (36)

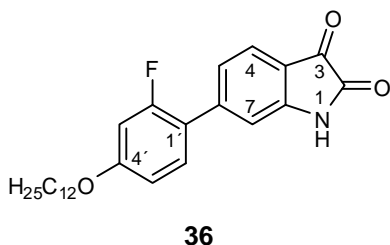

1.5 mmol (0.339 g) 6-bromoisatin and 1.65 mmol (0.535 g) of the boronic acid **6** have been converted and purified according to general procedure A yielding 0.270 g (42%) **36** as a orange solid.  $R_f=0.35$  ( $\text{SiO}_2$ , DCM/MTBE 15:1); m.p. Cr 165 °C I (DCM/MTBE 15:1);  $^1\text{H}$  NMR (500 MHz,  $\text{CDCl}_3$ , 50 °C):  $\delta=8.19$  (s, 1H; NH), 7.62 (d,  $^3J=8.0$  Hz, 1H; 4-H), 7.35 (m, 1H; 6'-H), 7.23 (d,  $^3J=6.7$  Hz, 1H; 5-H), 7.07 (s, 1H; 7-H), 6.78 (dd,  $^3J=8.7$  Hz,  $^4J=2.4$  Hz, 1H; 5'-H), 6.70 (dd,  $^3J_{\text{H,F}}=13.0$  Hz,  $^4J=2.4$  Hz, 1H; 3'-H), 4.00 (t,  $^3J=6.6$  Hz, 2H;  $\alpha\text{-CH}_2$ ), 1.80 (m, 2H;  $\beta\text{-CH}_2$ ),

1.46 (m, 2H;  $\gamma$ -CH<sub>2</sub>), 1.40-1.22 (m, 16H; CH<sub>2</sub>), 0.87 ppm (t,  $^3J=6.9$  Hz, 3H; CH<sub>3</sub>); <sup>13</sup>C NMR (125.8 MHz, CDCl<sub>3</sub>, 50 °C):  $\delta=182.11$  (s; C-3), 161.57 (s,  $^3J_{C,F}=11.4$  Hz; C-4'), 160.65 (s,  $^1J_{C,F}=250.0$  Hz; C-2'), 159.71 (s; C-2), 149.38 (s; C-7a), 146.70 (s; C-6), 130.73 (d,  $^3J_{C,F}=4.7$  Hz; C-6'), 125.74 (d; C-4), 124.20 (d,  $^4J_{C,F}=3.2$  Hz; C-5), 119.34 (s,  $^2J_{C,F}=13.1$  Hz; C-1'), 116.81 (s; C-3a), 112.41 (d,  $^4J_{C,F}=4.5$  Hz; C-7), 111.49 (d,  $^4J_{C,F}=2.8$  Hz; C-5'), 102.98 (d,  $^2J_{C,F}=26.2$  Hz; C-3'), 68.79 (t;  $\alpha$ -CH<sub>2</sub>), 31.92, 29.65, 29.62, 29.58, 29.55, 29.34, 29.32 (7  $\times$  t; CH<sub>2</sub>), 29.11 (t;  $\beta$ -CH<sub>2</sub>), 26.00 (t;  $\gamma$ -CH<sub>2</sub>), 22.66 (t; CH<sub>2</sub>), 14.02 ppm (q; CH<sub>3</sub>); <sup>19</sup>F NMR (282.2 MHz, CDCl<sub>3</sub>, 50 °C):  $\delta=-113.58$  ppm (m; 2'-F); IR (ATR):  $\tilde{\nu}=3276$  (bm), 2915 (s), 2847 (s), 1762 (m), 1728 (s), 1614 (s), 1517 (w), 1469 (m), 1442 (w), 1425 (w), 1381 (w), 1341 (m), 1292 (s), 1225 (w), 1160 (s), 1118 (s), 997 (w), 953 (w), 896 (w), 845 (m), 815 (w), 799 (m), 729 (w), 715 (w), 692 (w), 653 cm<sup>-1</sup> (m); UV/Vis (EtOH, 10 mg/L)  $\lambda_{\max}$ : 250 (s), 346 nm (m); MS (EI, 70 eV) m/z (%): 425 (23) [M<sup>+</sup>], 397 (5) [M<sup>+</sup> -CO], 257 (17) [M<sup>+</sup> -C<sub>12</sub>H<sub>25</sub>], 242 (14), 229 (100) [M<sup>+</sup> -C<sub>12</sub>H<sub>25</sub> -CO], 202 (17) [M<sup>+</sup> -C<sub>12</sub>H<sub>25</sub> -2CO], 173 (5), 157 (6); HRMS (EI, 70 eV): calcd for C<sub>26</sub>H<sub>32</sub>FNO<sub>3</sub> [M<sup>+</sup>]: 425.2366, found: 425.236; elemental analysis calcd (%) for C<sub>26</sub>H<sub>32</sub>FNO<sub>3</sub>: C 73.38, H 7.58, N 3.29, found: C 72.76, H 7.61, N 3.07.

### 6-(4-(Dodecyloxy)-2-methylphenyl)indolin-2,3-dione (37)

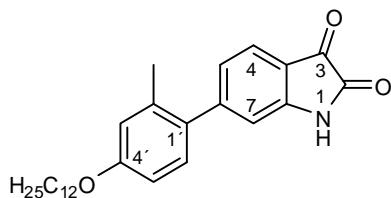

**37**

3.0 mmol (0.678 g) 6-bromoisatin and 4.0 mmol (1.280 g) of the boronic acid **7** have been converted and purified according to general procedure A yielding 1.136 g (90%) **37** as a orange solid.  $R_f=0.60$  (SiO<sub>2</sub>,

DCM/MTBE 15:1); m.p. Cr 125 °C I (DCM/MTBE 15:1); <sup>1</sup>H NMR (300 MHz, CDCl<sub>3</sub>, 25°C):  $\delta=9.04$  (s, 1H; NH), 7.58 (d,  $^3J=7.8$  Hz, 1H; 4-H), 7.12 (d,  $^3J=8.2$  Hz, 1H; 6'-H), 7.01 (dd,  $^3J=7.8$  Hz,  $^4J=1.2$  Hz, 1H; 5-H), 6.90 (s, 1H; 7-H), 6.80 (s, 1H; 3'-H), 6.77 (dd,  $^3J=9.8$  Hz,  $^4J=2.4$  Hz, 1H; 5'-H), 3.97 (t,  $^3J=6.5$  Hz, 2H;  $\alpha$ -CH<sub>2</sub>), 2.28 (s, 3H; 2'-CH<sub>3</sub>), 1.78 (m, 2H;  $\beta$ -CH<sub>2</sub>), 1.45 (m, 2H;  $\gamma$ -CH<sub>2</sub>), 1.38-1.18 (m, 16H; CH<sub>2</sub>), 0.86 ppm (t,  $^3J=6.6$  Hz, 3H; alkyl-CH<sub>3</sub>); <sup>13</sup>C NMR (75.5 MHz, CDCl<sub>3</sub>, 25°C):  $\delta=182.64$  (s; C-3), 160.33 (s; C-2), 159.34 (s; C-4'), 153.25 (s; C-6), 149.37 (s; C-7a), 136.53 (s; C-2'), 132.43 (s; C-1'), 130.42 (d; C-6'), 125.38 (d; C-5), 125.25 (d; C-4), 116.81 (s; C-3a), 116.17 (d; C-3'), 113.59 (d; C-7), 112.04 (d; C-5'), 68.03 (t;  $\alpha$ -CH<sub>2</sub>), 31.89, 29.57, 29.36, 29.32 (4  $\times$  t; CH<sub>2</sub>), 29.23 (t;  $\beta$ -CH<sub>2</sub>), 26.02 (t;  $\gamma$ -CH<sub>2</sub>), 22.66 (t; CH<sub>2</sub>), 20.73 (q; C-2'-CH<sub>3</sub>), 14.09 ppm (q; alkyl-CH<sub>3</sub>); IR (ATR):  $\tilde{\nu}=3285$  (bw), 2911 (s), 2846 (m), 1763 (s), 1730 (s), 1613 (s), 1470 (m), 1434 (w), 1380 (w), 1336 (w), 1293 (m), 1231 (m), 1168 (w), 1119 (m), 1073 (w), 1043 (w), 1016 (w), 953 (w), 900

(w), 860 (w), 818 (w), 802 (w), 734 (w), 690  $\text{cm}^{-1}$  (w); UV/Vis (EtOH, 10 mg/L)  $\lambda_{\text{max}}$ : 249 (s), 351 nm (m); MS (EI, 70 eV)  $m/z$  (%): 421 (26) [ $M^+$ ], 253 (31) [ $M^+ - \text{C}_{12}\text{H}_{25}$ ], 225 (100) [ $M^+ - \text{C}_{12}\text{H}_{25} - \text{CO}$ ], 197 (14) [ $M^+ - \text{C}_{12}\text{H}_{25} - 2\text{CO}$ ], 170 (12), 141 (7), 115 (6), 83 (5), 71 (11), 69 (14), 55 (32); HRMS (EI, 70 eV): calcd for  $\text{C}_{27}\text{H}_{35}\text{NO}_3$  [ $M^+$ ]: 421.2617, found: 421.262; elemental analysis calcd (%) for  $\text{C}_{27}\text{H}_{35}\text{NO}_3$ : C 76.92, H 8.37, N 3.32, found: C 76.65, H 8.29, N 3.23.

### 7-(4-(Dodecyloxy)phenyl)indolin-2,3-dione (38)

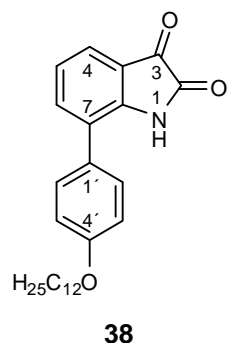

4.0 mmol (0.904 g) 7-bromoisatin and 4.0 mmol (1.280 g) of the boronic acid **5** have been converted and purified according to general procedure A yielding 1.478 g (90%) **38** as a orange solid.  $R_f=0.68$  ( $\text{SiO}_2$ , DCM/MTBE 15:1); m.p. Cr 109.2  $^\circ\text{C}$  (23.6 kJ/mol) I (DCM/MTBE 15:1);  $^1\text{H}$  NMR

(300 MHz, DMSO, 25 $^\circ\text{C}$ ):  $\delta=10.84$  (s, 1H, NH), 7.52 (d,  $^3J=7.7$  Hz, 1H; 6-H), 7.47 (d,  $^3J=7.4$  Hz, 1H; 4-H), 7.38 (d,  $^3J=8.4$  Hz, 2H; 2'-H and 6'-H), 7.13 (t,  $^3J=7.7$  Hz, 1H; 5-H), 7.01 (d,  $^3J=8.5$  Hz, 2H; 3'-H and 5'-H), 4.00 (t,  $^3J=6.3$  Hz, 2H;  $\alpha\text{-CH}_2$ ), 1.75-1.68 (m, 2H;  $\beta\text{-CH}_2$ ), 1.47-1.37 (m, 2H;  $\gamma\text{-CH}_2$ ), 1.25 (m, 16H;  $\text{CH}_2$ ), 0.85 ppm (t,  $^3J=6.6$  Hz, 3H;  $\text{CH}_3$ );  $^{13}\text{C}$  NMR (75.5 MHz, DMSO, 25 $^\circ\text{C}$ ):  $\delta=184.49$  (s; C-3), 159.94 (s; C-2), 158.41 (s; C-4'), 147.32 (s; C-7a), 138.45 (d; C-6), 129.44 (d; C-2' and C-6'), 127.42 (s; 1'-C), 125.62 (s; C-7), 123.06 (d; C-4), 122.99 (d; C-5), 118.41 (s; C-3a), 114.72 (d; C-3' and C-5'), 67.41 (t;  $\alpha\text{-CH}_2$ ), 31.24, 28.97, 28.74, 28.67, 28.60 (5  $\times$  t;  $\text{CH}_2$ ), 25.46 (t;  $\gamma\text{-CH}_2$ ), 22.03 (t;  $\text{CH}_2$ ), 13.83 ppm (q;  $\text{CH}_3$ ); IR (ATR):  $\tilde{\nu}=3256$  (bm), 2920 (s), 2850 (m), 1758 (s), 1736 (s), 1607 (s), 1514 (m), 1483 (m), 1436 (m), 1407 (w), 1377 (w), 1324 (w), 1246 (s), 1179 (m), 1110 (w), 1026 (w), 956 (w), 834 (w), 824 (w), 778 (w), 732 (m), 700 (m), 614  $\text{cm}^{-1}$  (w); UV/Vis (EtOH, 10 mg/L)  $\lambda_{\text{max}}$ : 248 (s), 428 nm (w); MS (EI, 70 eV)  $m/z$  (%): 407 (32) [ $M^+$ ], 239 (17) [ $M^+ - \text{C}_{12}\text{H}_{25}$ ], 211 (7) [ $M^+ - \text{C}_{12}\text{H}_{25} - \text{CO}$ ], 183 (100) [ $M^+ - \text{C}_{12}\text{H}_{25} - 2\text{CO}$ ], 154 (14), 139 (5), 127 (7), 83 (6), 69 (14), 57 (25), 55 (26); HRMS (EI, 70 eV): calcd for  $\text{C}_{26}\text{H}_{33}\text{NO}_3$  [ $M^+$ ]: 407.2461, found: 407.245; elemental analysis calcd (%) for  $\text{C}_{26}\text{H}_{33}\text{NO}_3$ : C 76.62, H 8.16, N 3.44, found: C 76.56, H 8.15, N 3.27.

## Syntheses of the *N,N'*-unsubstituted Indigo Derivatives (Type III):

### General procedure B:

To a 0.1 molar solution of the isatin derivative in dry toluene 1.05 eq. phosphorous pentachloride were given and the reaction was heated to 100 °C for 4 hours under argon atmosphere. Subsequently the dark red reaction mixture was cooled to 50 °C, 2.2 eq. thiophenol were added and kept on this temperature for 16 hours. To the dark solution 1.5 times the volume of methanol was given to precipitate the crude product, which was filtered off as a coloured solid. Most of these solid were insoluble and could not be purified further or solved for analytic purpose.

### 4,4'-Bis-(4-(dodecyloxy)phenyl)indigo (**8**)

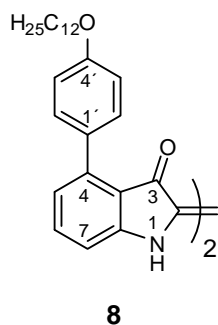

After reacting 0.50 mmol (0.204 g) **29** according to general procedure B the crude product was purified chromatographically (silica gel, DCM/cyclohexane 2:1), yielding 0.091 g (46%) **8** as a blue solid.  $R_f=0.31$  (SiO<sub>2</sub>, *c*Hex/DCM 2:1); m.p. Cr 253.1 °C (37.6 kJ/mol) I (*c*Hex/DCM 2:1); <sup>1</sup>H NMR

(300 MHz, CDCl<sub>3</sub>, 25°C):  $\delta=9.04$  (s, 2H; NH), 7.53 (d, <sup>3</sup>*J*=8.7 Hz, 4H; 2'-H and 6'-H), 7.42 (t, <sup>3</sup>*J*=7.8 Hz, 2H; 6-H), 6.98 (d, <sup>3</sup>*J*=8.7 Hz, 4H; 3'-H and 5'-H), 6.87 (d, <sup>3</sup>*J*=7.4 Hz, 2H; 5-H), 6.83 (d, <sup>3</sup>*J*=8.0 Hz, 2H; 7-H), 4.01 (t, <sup>3</sup>*J*=6.5 Hz, 4H;  $\alpha$ -CH<sub>2</sub>), 1.80 (m, 4H;  $\beta$ -CH<sub>2</sub>), 1.47 (m, 4H;  $\gamma$ -CH<sub>2</sub>), 1.40-1.18 (m, 32H; CH<sub>2</sub>), 0.87 ppm (t, <sup>3</sup>*J*=6.7 Hz, 6H; CH<sub>3</sub>); <sup>13</sup>C NMR (125.8 MHz, CDCl<sub>3</sub>, 25°C):  $\delta=187.88$  (s; C-3), 159.49 (s; C-4'), 152.64 (s; C-7a), 142.24 (s; C-4), 135.57 (d; C-6), 130.38 (d; C-2' and C-6'), 129.30 (s; C-1'), 122.32 (d; C-5), 121.63 (s; C-2), 115.95 (s; C-3a), 113.70 (d; C-3' and C-5'), 110.38 (s; C-7), 67.89 (t;  $\alpha$ -CH<sub>2</sub>), 29.36 (t; CH<sub>2</sub>), 29.25 (t;  $\beta$ -CH<sub>2</sub>), 26.07 (t;  $\gamma$ -CH<sub>2</sub>), 22.71 (t; CH<sub>2</sub>), 14.18 ppm (q; CH<sub>3</sub>); IR (ATR):  $\tilde{\nu}=2915$  (s), 2848 (m), 1635 (m), 1599 (s), 1516 (w), 1486 (m), 1414 (w), 1392 (m), 1300 (w), 1221 (s), 1173 (s), 1080 (s), 1049 (m), 918 (m), 831 (w), 799 (m), 770 (m), 701 (m), 617 cm<sup>-1</sup> (w); UV/Vis (NMP, 10 mg/L)  $\lambda_{max}$ : 306 (m), 634 nm (m); MS (EI, 70 eV) *m/z* (%): 783 (9) [*M*<sup>+</sup>], 615 (2) [*M*<sup>+</sup>-C<sub>12</sub>H<sub>25</sub>], 446 (6) [*M*<sup>+</sup>-2C<sub>12</sub>H<sub>25</sub>], 418 (3), 401 (4), 250 (3), 225 (6), 196 (9), 168 (11), 139 (12), 84 (50), 57 (100); elemental analysis calcd (%) for C<sub>52</sub>H<sub>66</sub>N<sub>2</sub>O<sub>4</sub>, C 79.76, H 8.50, N 3.58, found: C 79.31, H 8.58, N 3.43.

### 5,5'-Bis-(4-(dodecyloxy)phenyl)indigo (9)

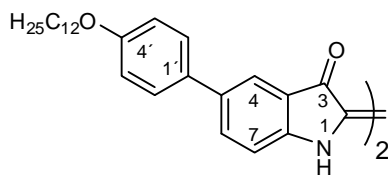

9

After reacting 2.42 mmol (0.986 g) **30** according to general procedure B the crude product was filtered off, yielding 0.650 g (69%) **11** as a violet solid. m.p. decomp. at 350 °C, before smectic (MeOH/toluene); IR (ATR):  $\tilde{\nu}$ =3359 (w), 2916 (s), 2848 (m), 1731 (w), 1694 (w), 1635 (s), 1622 (s), 1561 (w), 1517 (w), 1472 (m), 1448 (m), 1268 (s), 1252 (m), 1203 (m), 1144 (m), 1028 (w), 814 (s), 727 (w), 672  $\text{cm}^{-1}$  (w); UV/Vis (NMP, 10 mg/L)  $\lambda_{\text{max}}$ : 285 (s), 647 nm (m).

### 5,5'-Bis-(4-dodecylphenyl)indigo (14)

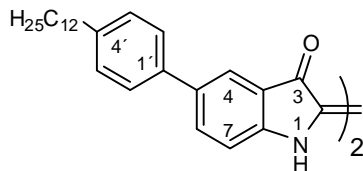

14

After reacting 1.00 mmol (0.391 g) **31** according to general procedure B the crude product was filtered off, yielding 0.166 g (44%) **14** as a violet solid. m.p. decomp. at 326 °C, before smectic (MeOH/toluene); IR (ATR):  $\tilde{\nu}$ =3374 (w), 2915 (s), 2847 (m), 1626 (s), 1612 (s), 1586 (w), 1470 (m), 1447 (m), 1406 (w), 1260 (w), 1189 (w), 1137 (s), 1073 (w), 812 (m), 783 (w), 717 (w), 669  $\text{cm}^{-1}$  (m); UV/Vis (NMP, 10 mg/L)  $\lambda_{\text{max}}$ : 641 nm (m).

### 5,5'-Bis-(2-fluoro-4-(dodecyloxy)phenyl)indigo (15)

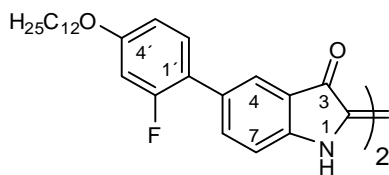

15

After reacting 1.00 mmol (0.425 g) **32** according to general procedure B the crude product was suspended in boiling ethyl acetate applying ultrasound and filtered off after cooling to room temperature yielding 0.321 g (78%) **15** as a blue solid. m.p. Cr 116.6 (38.3) SC 322.9 °C (36.5 kJ/mol) I, Decomp. (EtOAc); IR (ATR):  $\tilde{\nu}$ =3373 (m), 2916 (s), 2850 (m), 1637 (s), 1622 (s), 1573 (w), 1516 (w), 1466 (m), 1449 (m), 1406 (w), 1320 (w), 1278 (m), 1230 (w), 1199 (m), 1162 (m), 1141 (m), 1119 (m), 1076 (w), 1036 (w), 1003 (w), 956 (w), 896 (w), 838 (m), 818 (m), 811 (m), 746 (w), 721 (w), 669  $\text{cm}^{-1}$  (m); elemental analysis calcd (%) for  $\text{C}_{52}\text{H}_{64}\text{F}_2\text{N}_2\text{O}_4$ : C 76.25, H 7.88, N 3.42, gef.: C 75.55, H 7.97, N 3.44.



### 5,5'-Bis-(4-(dodecyloxy)-2-methylphenyl)indigo (16)

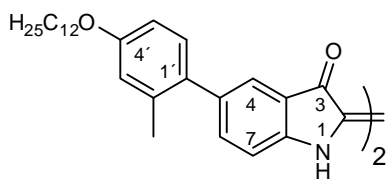

**16**

After reacting 1.00 mmol (0.421 g) **33** according to general procedure B the crude product was suspended in boiling ethyl acetate applying ultrasound and filtered off after cooling to room temperature yielding

0.267 g (66%) **16** as a blue solid. m.p. Cr 241.4 (4.4) SC 168.6 °C (56.6 kJ/mol) I (EtOAc); IR (ATR):  $\tilde{\nu}$ =3356 (w), 2916 (s), 2851 (m), 1630 (s), 1609 (s), 1563 (w), 1471 (s), 1394 (w), 1291 (m), 1233 (m), 1187 (s), 1146 (m), 1120 (s), 1074 (m), 1050 (m), 906 (w), 864 (w), 833 (m), 810 (m), 782 (m), 734 (w), 716 (w), 670  $\text{cm}^{-1}$  (w); UV/Vis (NMP, 10 mg/L)  $\lambda_{\text{max}}$ : 633 nm (m); elemental analysis calcd (%) for  $\text{C}_{54}\text{H}_{70}\text{N}_2\text{O}_4$ : C 79.96, H 8.70, N 3.45, gef.: C 79.40, H 8.71, N 3.48.

### 6,6'-Bis-(4-(dodecyloxy)phenyl)indigo (10)

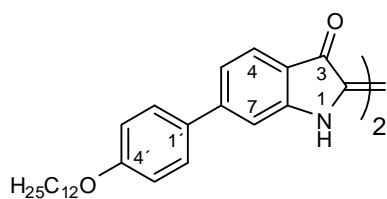

**10**

After reacting 2.00 mmol (0.815 g) **34** according to general procedure B the crude product was filtered off, yielding 0.297 g (38%) **10** as a dark green solid. m.p. Decomp. at 320 °C (MeOH/toluene); IR (ATR):  $\tilde{\nu}$

=3308 (w), 2917 (s), 2848 (s), 1604 (m), 1518 (m), 1466 (w), 1448 (w), 1378 (w), 1247 (w), 1176 (w), 1143 (w), 1110 (w), 1034 (w), 820 (w), 779 (w), 719 (w), 707  $\text{cm}^{-1}$  (w); UV/Vis (NMP, 10 mg/L)  $\lambda_{\text{max}}$ : 316 (s), 405 (s); 618 nm (m).

### 6,6'-Bis-(4-dodecylphenyl)indigo (20)

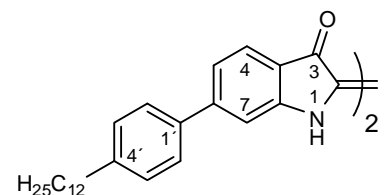

**20**

After reacting 1.00 mmol (0.391 g) **35** according to general procedure B the crude product was filtered off, yielding 0.122 g (33%) **20** as a dark green solid. m.p. Decomp. at 320 °C (MeOH/toluene); IR (ATR):  $\tilde{\nu}$

=3293 (w), 2916 (s), 2847 (s), 1613 (s), 1560 (m), 1520 (w), 1463 (w), 1447 (m), 1380 (w), 1338 (m), 1303 (w), 1180 (w), 1143 (m), 1110 (m), 1080 (w), 1006 (w), 916 (w), 870 (w), 843 (w), 809 (w), 776 (w), 746 (w), 705  $\text{cm}^{-1}$  (w).

### 6,6'-Bis-(2-fluoro-4-(dodecyloxy)phenyl)indigo (21)

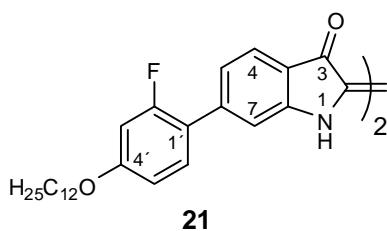

After reacting 0.50 mmol (0.213 g) **36** according to general procedure B the crude product was suspended in boiling ethyl acetate applying ultrasound and filtered off after cooling to room temperature yielding 0.119 g (58%) **21** as a green solid. m.p. Cr 239.2 (7.9) SmF/I 296.8 °C (56.1 kJ/mol) I (EtOAc); IR (ATR):  $\tilde{\nu}$ =3326 (w), 2917 (m), 2846 (m), 1609 (s), 1576 (m), 1513 (m), 1463 (w), 1444 (m), 1384 (w), 1314 (m), 1283 (m), 1233 (m), 1160 (m), 1132 (s), 1076 (m), 1010 (w), 956 (w), 903 (w), 873 (w), 829 (m), 782 (w), 746 (m), 704 cm<sup>-1</sup> (m); UV/Vis (CHCl<sub>3</sub>, 10 mg/L)  $\lambda_{\text{max}}$ : 341 (m), 619 nm (m); elemental analysis calcd (%) for C<sub>52</sub>H<sub>64</sub>F<sub>2</sub>N<sub>2</sub>O<sub>4</sub>: C 76.25, H 7.88, N 3.42, found: C 76.44, H 8.04, N 3.49.

### 6,6'-Bis-(4-(dodecyloxy)-2-methylphenyl)indigo (22)

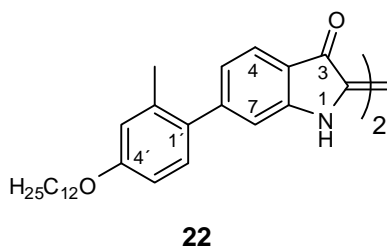

After reacting 1.50 mmol (0.632 g) **37** according to general procedure B the crude product was suspended in boiling ethyl acetate applying ultrasound and filtered off after cooling to room temperature yielding 0.459 g (75%) **22** as a green solid. m.p. Cr 141.0 (20.5) SmF/I 263.8 °C (44.2 kJ/mol) I (EtOAc); IR (ATR):  $\tilde{\nu}$ =3334 (w), 2915 (m), 2848 (m), 1607 (s), 1576 (m), 1509 (m), 1463 (w), 1441 (s), 1383 (w), 1307 (m), 1286 (m), 1230 (m), 1200 (w), 1166 (w), 1130 (s), 1113 (s), 1077 (m), 1040 (w), 1012 (w), 896 (w), 843 (w), 783 (m), 744 (w), 707 cm<sup>-1</sup> (m); UV/Vis (CHCl<sub>3</sub>, 20 mg/L)  $\lambda_{\text{max}}$ : 292 (s), 398 (m), 604 nm (m); elemental analysis calcd (%) for C<sub>54</sub>H<sub>70</sub>N<sub>2</sub>O<sub>4</sub>: C 79.96, H 8.70, N 3.45, found: C 79.69, H 8.67, N 3.37.

### 7,7'-Bis-(4-(dodecyloxy)phenyl)indigo (11)

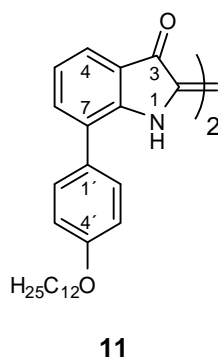

After reacting 2.00 mmol (0.815 g) **38** according to general procedure B the crude product was purified chromatographically (silica gel, DCM/cyclohexane 1:1), yielding 0.426 g (54%) **11** as a blue solid. R<sub>f</sub>=0.31 (SiO<sub>2</sub>, cHex/DCM 1:1); m.p. Cr 217.8 °C (30.1 kJ/mol) I (cHex/DCM 1:1); <sup>1</sup>H NMR

(300 MHz, CDCl<sub>3</sub>, 25°C): δ=9.08 (s, 2H; NH), 7.62 (d, <sup>3</sup>J=7.6 Hz, 2H; 4-H), 7.47 (d, <sup>3</sup>J=8.4 Hz, 4H; 2'-H and 6'-H), 7.44 (d, <sup>3</sup>J=7.2 Hz, 2H; 6-H), 7.05 (d, <sup>3</sup>J=8.5 Hz, 4H; 3'-H and 5'-H), 7.00 (t, <sup>3</sup>J=7.7 Hz, 2H; 5-H), 4.02 (t, <sup>3</sup>J=6.5 Hz, 4H; α-CH<sub>2</sub>), 1.83 (m, 4H; β-CH<sub>2</sub>), 1.49 (m, 4H; γ-CH<sub>2</sub>), 1.41-1.18 (m, 32H; CH<sub>2</sub>), 0.87 ppm (t, <sup>3</sup>J=6.6 Hz, 6H; CH<sub>3</sub>); <sup>13</sup>C NMR (75.5 MHz, CDCl<sub>3</sub>, 25°C): δ=188.82 (s; C-3), 159.22 (s; C-4'), 149.11 (s; C-7a), 135.42 (d; C-6), 128.75 (d; C-2' and C-6'), 128.26 (s; C-1'), 126.19 (s; C-7), 122.75 (d; C-4), 121.53 (s; C-2), 121.27 (d; C-5), 120.33 (s; C-3a), 115.50 (d; C-3' and C-5'), 68.16 (t; α-CH<sub>2</sub>), 31.92, 29.68, 29.62, 29.42, 29.36 (5 × t; CH<sub>2</sub>), 29.28 (t; β-CH<sub>2</sub>), 26.08 (t; γ-CH<sub>2</sub>), 22.69 (t; CH<sub>2</sub>), 14.12 ppm (q; CH<sub>3</sub>); IR (ATR):  $\tilde{\nu}$ =2918 (m), 2849 (s), 1635 (s), 1602 (m), 1513 (w), 1483 (m), 1430 (w), 1409 (m), 1300 (w), 1282 (m), 1248 (m), 1146 (s), 1094 (m), 1052 (w), 1021 (w), 837 (w), 807 (w), 757 (w), 708 cm<sup>-1</sup> (w); UV/Vis (NMP, 10 mg/L)  $\lambda_{\text{max}}$ : 314 (s), 621 nm (m); MS (EI, 70 eV) m/z (%): 783 (15) [M<sup>+</sup>], 613 (3) [M<sup>+</sup>-C<sub>12</sub>H<sub>25</sub>], 446 (8) [M<sup>+</sup>-2C<sub>12</sub>H<sub>25</sub>], 417 (6), 218 (3), 196 (7), 139 (6), 109 (6), 84 (26), 71 (37), 57 (100); elemental analysis calcd (%) for C<sub>52</sub>H<sub>66</sub>N<sub>2</sub>O<sub>4</sub>, C 79.76, H 8.50, N 3.58, found: C 79.41, H 8.47, N 3.46.

## Syntheses of the *N,N'*-diacetylated Indigo Derivates (Type IV):

### General procedure C:

1 eq. of the *N,N'*-unsubstituted indigo derivative was suspended in 50 times the amount of dry NMP and treated with 50 eq. acetic anhydride and 50 eq. acetyl chloride. The reaction suspension was stirred for 6 hours at 90 °C under argon atmosphere. After adding twice the amount of water and ethyl acetate, the organic phase was separated and washed five times with water and once with saturated sodium carbonate solution and dried over magnesium sulphate. The solvent was removed under reduced pressure and the crude product was purified chromatographically (silica gel, DCM) and finally recrystallised from ethanol.

### *N,N'*-Diacetyl-5,5'-bis-(4-(dodecyloxy)phenyl)indigo (**12**)

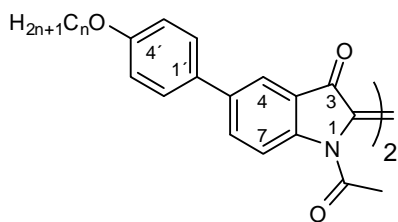

**12**

0.50 mmol (0.391 g) **9** have been converted and purified according to general procedure C yielding 0.324 g (75%) **12** as a violet solid.  $R_f=0.34$  (SiO<sub>2</sub>, *c*Hex/EtOAc 3:1); m.p. Cr 124.8 (53.2) Cr<sub>2</sub> 160.5 °C (26.7 kJ/mol) I (EtOH); <sup>1</sup>H NMR (300 MHz, CDCl<sub>3</sub>, 25°C):

$\delta=8.26$  (d, <sup>3</sup>*J*=8.4 Hz, 2H; 7-H), 7.89 (d, <sup>4</sup>*J*=1.7 Hz, 2H; 4-H), 7.82 (dd, <sup>3</sup>*J*=8.6 Hz, <sup>4</sup>*J*=1.9 Hz, 2H; 6-H), 7.48 (d, <sup>3</sup>*J*=8.7 Hz, 4H; 2'-H and 6'-H), 6.95 (d, <sup>3</sup>*J*=8.7 Hz, 4H; 3'-H and 5'-H), 3.98 (t, <sup>3</sup>*J*=6.5 Hz, 4H;  $\alpha$ -CH<sub>2</sub>), 2.57 (s, 6H; NCOCH<sub>3</sub>), 1.79 (m, 4H;  $\beta$ -CH<sub>2</sub>), 1.45 (m, 4H;  $\gamma$ -CH<sub>2</sub>), 1.38-1.20 (m, 32H; CH<sub>2</sub>), 0.86 ppm (t, <sup>3</sup>*J*=6.5 Hz, 6H; CH<sub>3</sub>); <sup>13</sup>C NMR (75.5 MHz, CDCl<sub>3</sub>, 25°C):  $\delta=184.19$  (s; C-3), 169.96 (s; NCOCH<sub>3</sub>), 159.22 (s; C-4'), 147.78 (s; C-7a), 138.34 (s; C-5), 135.09 (d; C-6), 131.23 (s; C-1'), 127.89 (d; C-2' and C-6'), 126.53 (s; C-2), 122.45 (s; C-3a), 121.64 (d; C-4), 117.46 (d; C-7), 115.02 (d; C-3' and C-5'), 68.15 (t;  $\alpha$ -CH<sub>2</sub>), 31.90, 29.62, 29.58, 29.38, 29.33 (5 × t; CH<sub>2</sub>), 29.22 (t;  $\beta$ -CH<sub>2</sub>), 26.02 (t;  $\gamma$ -CH<sub>2</sub>), 23.88 (q; NCOCH<sub>3</sub>), 22.67 (t; CH<sub>2</sub>), 14.10 ppm (q; CH<sub>3</sub>); IR (ATR):  $\tilde{\nu}=2921$  (m), 2851 (m), 1707 (m), 1676 (s), 1608 (m), 1520 (w), 1470 (s), 1360 (w), 1298 (m), 1268 (m), 1245 (s), 1179 (m), 1115 (m), 1071 (s), 1029 (m), 929 (w), 822 (m), 789 (w), 777 (w), 718 (w), 646 cm<sup>-1</sup> (w); UV/Vis (CHCl<sub>3</sub>, 10 mg/L)  $\lambda_{max}$ : 289 (s), 345 (m), 579 nm (m); elemental analysis calcd (%) for C<sub>56</sub>H<sub>70</sub>N<sub>2</sub>O<sub>6</sub>: C 77.56, H 8.14, N 3.23, found: C 77.78, H 8.17, N 3.15.

### *N,N'*-Diacetyl-5,5'-bis-(4-dodecylphenyl)indigo (**17**)

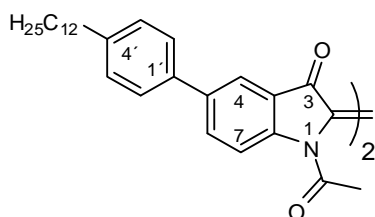

**17**

0.15 mmol (0.113 g) **14** have been converted and purified according to general procedure C yielding 0.113 g (87%) **17** as a violet solid.  $R_f=0.43$  (SiO<sub>2</sub>, *c*Hex/EtOAc 3:1); m.p. Cr 106.8 °C (56.2 kJ/mol) I (EtOH); <sup>1</sup>H NMR (300 MHz, CDCl<sub>3</sub>, 25°C):  $\delta=8.29$  d, <sup>3</sup>*J*=8.3

Hz, 2H; 7-H), 7.94 (d, <sup>4</sup>*J*=1.7 Hz, 2H; 4-H), 7.87 (dd, <sup>3</sup>*J*=8.6 Hz, <sup>4</sup>*J*=2.0 Hz, 2H; 6-H), 7.48 (d, <sup>3</sup>*J*=8.1 Hz, 4H; 2'-H and 6'-H), 7.25 (d, <sup>3</sup>*J*=8.0 Hz, 4H; 3'-H and 5'-H), 2.63 (t, <sup>3</sup>*J*=7.7 Hz, 4H;  $\alpha$ -CH<sub>2</sub>), 2.58 (s, 6H; NCOCH<sub>3</sub>), 1.62 (m, 4H;  $\beta$ -CH<sub>2</sub>), 1.38-1.18 (m, 36H; CH<sub>2</sub>), 0.86 ppm (t, <sup>3</sup>*J*=6.6 Hz, 6H; CH<sub>3</sub>); <sup>13</sup>C NMR (75.5 MHz, CDCl<sub>3</sub>, 25°C):  $\delta=184.15$  (s; C-3), 169.95 (s; NCOCH<sub>3</sub>), 148.05 (s; C-7a), 142.98 (s; C-4'), 138.57 (s; C-5), 136.28 (s; C-1'), 135.41 (d; C-6), 129.09 (d; C-3' and C-5'), 126.68 (d; C-2' and C-6'), 122.43 (s; C-3a), 122.03 (d; C-4),

117.47 (d; C-7), 35.59 (t;  $\alpha$ -CH<sub>2</sub>), 31.90 (t; CH<sub>2</sub>), 31.46 (t;  $\beta$ -CH<sub>2</sub>), 29.65, 29.50, 29.33 (3  $\times$  t; CH<sub>2</sub>), 23.89 (q; NCOCH<sub>3</sub>), 22.68 (t; CH<sub>2</sub>), 14.12 ppm (q; CH<sub>3</sub>); IR (ATR):  $\bar{\nu}$ =2922 (s), 2851 (m), 1707 (m), 1679 (s), 1612 (m), 1472 (s), 1435 (w), 1360 (m), 1303 (m), 1284 (m), 1235 (w), 1187 (m), 1169 (m), 1115 (m), 1071 (m), 1026 (w), 1004 (w), 930 (w), 828 (w), 777 (w), 718 (w), 616 cm<sup>-1</sup> (s); UV/Vis (CHCl<sub>3</sub>, 10 mg/L)  $\lambda_{\text{max}}$ : 284 (m), 343 (m), 572 nm (m); elemental analysis calcd (%) for C<sub>56</sub>H<sub>70</sub>N<sub>2</sub>O<sub>4</sub>: C 80.53, H 8.45, N 3.35, found: C 80.48, H 8.43, N 3.29.

### ***N,N'*-Diacetyl-5,5'-bis-(2-fluoro-4-(dodecyloxy)phenyl)indigo (18)**

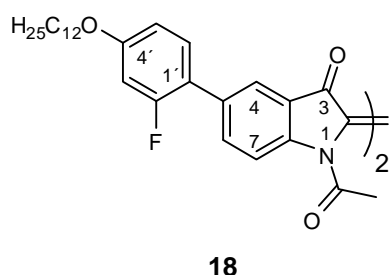

0.12 mmol (0.100 g) **15** have been converted and purified according to general procedure C yielding 0.038 g (34%) **18** as a violet solid.  $R_f$ =0.23 (SiO<sub>2</sub>, DCM); m.p. Cr 170.9 °C (32.6 kJ/mol) I (EtOH); <sup>1</sup>H NMR (300 MHz, CDCl<sub>3</sub>, 25°C):  $\delta$ =8.27 (d, <sup>3</sup> $J$ =8.3 Hz, 2H; 7-

H), 7.87 (s, 2H; 4-H), 7.78 (d, <sup>3</sup> $J$ =8.7 Hz, 2H; 6-H), 7.30 (m, 2H; 6'-H), 6.75 (dd, <sup>3</sup> $J$ =8.6 Hz, <sup>4</sup> $J$ =2.0 Hz, 2H; 5'-H), 6.68 (dd, <sup>3</sup> $J_{\text{H,F}}$ =12.7 Hz, <sup>4</sup> $J$ =2.2 Hz, 2H; 3'-H), 3.96 (t, <sup>3</sup> $J$ =6.5 Hz, 4H;  $\alpha$ -CH<sub>2</sub>), 2.56 (s, 6H; NCOCH<sub>3</sub>), 1.78 (m, 4H;  $\beta$ -CH<sub>2</sub>), 1.44 (m, 4H;  $\gamma$ -CH<sub>2</sub>), 1.38-1.20 (m, 32H; CH<sub>2</sub>), 0.86 ppm (t, <sup>3</sup> $J$ =6.5 Hz, 6H; CH<sub>3</sub>); <sup>13</sup>C NMR (75.5 MHz, CDCl<sub>3</sub>, 25°C):  $\delta$ =184.02 (s; C-3), 169.92 (s; NCOCH<sub>3</sub>), 160.35 (s, <sup>3</sup> $J_{\text{C,F}}$ =10.9 Hz; C-4'), 160.23 (s, <sup>1</sup> $J_{\text{C,F}}$ =248.0 Hz; C-2'), 147.94 (s; C-7a), 137.19 (d; C-6), 133.20 (s; C-5), 130.54 (d, <sup>3</sup> $J_{\text{C,F}}$ =4.5 Hz; C-6'), 126.44 (s; C-2), 124.09 (d; C-4), 122.13 (s; C-3a), 119.00 (s, <sup>2</sup> $J_{\text{C,F}}$ =13.5 Hz; C-1'), 117.13 (d; C-7), 111.09 (d; C-5'), 102.61 (s, <sup>2</sup> $J_{\text{C,F}}$ =26.1 Hz; C-3'), 68.51 (t;  $\alpha$ -CH<sub>2</sub>), 31.90, 29.62, 29.57, 29.33 (4  $\times$  t; CH<sub>2</sub>), 29.07 (t;  $\beta$ -CH<sub>2</sub>), 25.96 (t;  $\gamma$ -CH<sub>2</sub>), 23.88 (q; NCOCH<sub>3</sub>), 22.67 (t; CH<sub>2</sub>), 14.10 ppm (q; CH<sub>3</sub>); <sup>19</sup>F NMR (282.2 MHz, CDCl<sub>3</sub>):  $\delta$ =-115.61 ppm (m; 2'-F); IR (ATR):  $\bar{\nu}$ =2921 (s), 2846 (m), 1707 (s), 1679 (s), 1617 (s), 1568 (w), 1514 (w), 1469 (s), 1361 (m), 1310 (m), 1285 (s), 1225 (m), 1172 (s), 1120 (s), 1071 (s), 1028 (w), 929 (w), 837 (w), 722 (w), 623 cm<sup>-1</sup> (w); UV/Vis (CHCl<sub>3</sub>, 10 mg/L)  $\lambda_{\text{max}}$ : 287 (s), 340 (s), 570 nm (m); elemental analysis calcd (%) for C<sub>56</sub>H<sub>68</sub>F<sub>2</sub>N<sub>2</sub>O<sub>6</sub>: C 74.47, H 7.59, N 3.10, found: C 74.10, H 7.75, N 3.09.

### *N,N'*-Diacetyl-5,5'-bis-(4-(dodecyloxy)-2-methylphenyl)indigo (**19**)

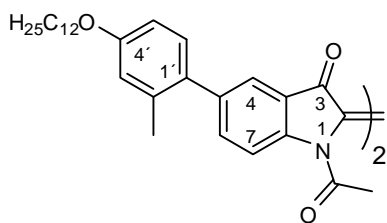

**19**

0.19 mmol (0.150 g) **16** have been converted and purified according to general procedure C yielding 0.130 g (78%) **19** as a red-violet solid.  $R_f=0.30$  (SiO<sub>2</sub>, DCM); m.p. Cr 110.6 °C (47.2 kJ/mol) I (EtOH); <sup>1</sup>H NMR (300 MHz, CDCl<sub>3</sub>, 25°C):  $\delta=8.27$  (d, <sup>3</sup> $J=8.4$

Hz, 2H; 7-H), 7.68 (d, <sup>4</sup> $J=1.6$  Hz, 2H; 4-H), 7.58 (dd, <sup>3</sup> $J=8.5$  Hz, <sup>4</sup> $J=1.9$  Hz, 2H; 6-H), 7.09 (d, <sup>3</sup> $J=8.3$  Hz, 2H; 6'-H), 6.79 (s, 2H; 3'-H), 6.76 (dd, <sup>3</sup> $J=8.6$  Hz, <sup>4</sup> $J=2.4$  Hz, 2H; 5'-H), 3.96 (t, <sup>3</sup> $J=6.5$  Hz, 4H;  $\alpha$ -CH<sub>2</sub>), 2.58 (s, 6H; NCOCH<sub>3</sub>), 2.21 (s, 6H; 2'-CH<sub>3</sub>), 1.78 (m, 4H;  $\beta$ -CH<sub>2</sub>), 1.45 (m, 4H;  $\gamma$ -CH<sub>2</sub>), 1.38-1.18 (m, 32H; CH<sub>2</sub>), 0.86 ppm (t, <sup>3</sup> $J=6.5$  Hz, 6H; alkyl-CH<sub>3</sub>); <sup>13</sup>C NMR (75.5 MHz, CDCl<sub>3</sub>, 25°C):  $\delta=184.13$  (s; C-3), 169.95 (s; NCOCH<sub>3</sub>), 158.82 (s; C-4'), 147.73 (s; C-7a), 139.10 (s; C-5), 138.02 (d; C-6), 136.59 (s; C-2'), 132.09 (s; C-1'), 130.69 (d; C-6'), 126.56 (s; C-2), 124.57 (d; C-4), 121.87 (s; C-3a), 116.89 (d; C-7), 116.56 (d; C-3'), 111.95 (d; C-5'), 68.01 (t;  $\alpha$ -CH<sub>2</sub>), 31.90, 29.59, 29.38, 29.34 (4 × t; CH<sub>2</sub>), 29.28 (t;  $\beta$ -CH<sub>2</sub>), 26.04 (t;  $\gamma$ -CH<sub>2</sub>), 23.90 (q; NCOCH<sub>3</sub>), 22.68 (t; CH<sub>2</sub>), 20.67 (q; C-2'-CH<sub>3</sub>), 14.11 ppm (q; alkyl-CH<sub>3</sub>); IR (ATR):  $\tilde{\nu}=2920$  (s), 2850 (m), 1708 (m), 1680 (s), 1610 (m), 1566 (w), 1469 (s), 1360 (w), 1268 (s), 1231 (s), 1186 (m), 1170 (s), 1114 (m), 1068 (s), 928 (m), 840 (w), 813 (w), 778 (w), 721 cm<sup>-1</sup> (w); UV/Vis (CHCl<sub>3</sub>, 10 mg/L)  $\lambda_{max}$ : 279 (s), 569 nm (m); elemental analysis calcd (%) for C<sub>58</sub>H<sub>74</sub>N<sub>2</sub>O<sub>6</sub>: C 77.82, H 8.33, N 3.13, found: C 77.95, H 8.34, N 3.09.

### *N,N'*-Diacetyl-6,6'-bis-(4-(dodecyloxy)phenyl)indigo (**13**)

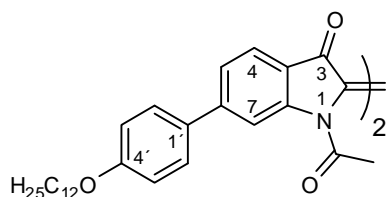

**13**

0.13 mmol (0.100 g) **10** have been converted and purified according to general procedure C yielding 0.065 g (60%) **13** as a red solid.  $R_f=0.14/0.31$  (SiO<sub>2</sub>, *c*Hex/EtOAc 3:1); m.p. Cr 180.6 (10.7) SmA 203.9 °C (7.0 kJ/mol) I

(EtOH); <sup>1</sup>H NMR (300 MHz, CDCl<sub>3</sub>, 25°C):  $\delta=8.49$  (s, 2H; 7-H), 7.76 (d, <sup>3</sup> $J=8.0$  Hz, 2H; 4-H), 7.61 (d, <sup>3</sup> $J=8.8$  Hz, 4H; 2'-H and 6'-H), 7.44 (dd, <sup>3</sup> $J=8.0$  Hz, <sup>4</sup> $J=1.3$  Hz, 2H; 5-H), 6.97 (d, <sup>3</sup> $J=8.8$  Hz, 4H; 3'-H and 5'-H), 4.00 (t, <sup>3</sup> $J=6.5$  Hz, 4H;  $\alpha$ -CH<sub>2</sub>), 2.57 (s, 6H; NCOCH<sub>3</sub>), 1.80 (m, 4H;  $\beta$ -CH<sub>2</sub>), 1.46 (m, 4H;  $\gamma$ -CH<sub>2</sub>), 1.40-1.18 (m, 32H; CH<sub>2</sub>), 0.87 ppm (t, <sup>3</sup> $J=6.6$  Hz, 6H; CH<sub>3</sub>); <sup>13</sup>C NMR (75.5 MHz, CDCl<sub>3</sub>, 25°C):  $\delta=183.43$  (s; C-3), 170.24 (s; NCOCH<sub>3</sub>), 160.19 (s; C-4'), 149.90 [two signals: (s; C-6) and (s; C-7a)], 131.82 (s; C1'), 128.83 (d; C-2' and C-

6'), 127.00 (s; C-2), 124.64 (d; C-4), 123.62 (d; C-5), 120.12 (s; C-3a), 115.05 (d; C-3' and C-5'), 114.85 (d, C-7), 68.23 (t;  $\alpha$ -CH<sub>2</sub>), 31.95, 29.67, 29.63, 29.42, 29.38 (5 × t; CH<sub>2</sub>), 29.25 (t;  $\beta$ -CH<sub>2</sub>), 26.06 (t;  $\gamma$ -CH<sub>2</sub>), 24.05 (q; NCOCH<sub>3</sub>), 21.92 (t; CH<sub>2</sub>), 14.15 ppm (q; CH<sub>3</sub>); IR (ATR):  $\tilde{\nu}$ =2921 (s), 2850 (m), 1707 (m), 1672 (m), 1598 (s), 1570 (w), 1518 (m), 1468 (m), 1433 (m), 1405 (m), 1363 (m), 1328 (w), 1302 (m), 1243 (s), 1177 (s), 1108 (m), 1070 (m), 1003 (w), 969 (w), 934 (w), 914 (w), 889 (w), 823 (m), 776 (m), 713 (w), 688 (w), 654 cm<sup>-1</sup> (w); UV/Vis (CHCl<sub>3</sub>, 10 mg/L)  $\lambda_{\text{max}}$ : 258 (m), 289 (m), 415 nm (m); elemental analysis calcd (%) for C<sub>56</sub>H<sub>70</sub>N<sub>2</sub>O<sub>6</sub>: C 77.56, H 8.14, N 3.23, found: C 77.64, H 8.16, N 3.17.

### *N,N'*-Diacetyl-6,6'-bis-(4-dodecylphenyl)indigo (**23**)

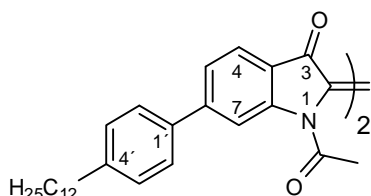

**23**

0.15 mmol (0.113 g) **20** have been converted and purified according to general procedure C yielding 0.123 g (95%) **23** as a red solid.  $R_f$ =0.33/0.48 (SiO<sub>2</sub>, *c*Hex/EtOAc 3:1); m.p. Cr 99.2 (18.8) Cr<sub>2</sub> 168.1 (7.6) SmA 178.0 °C

(6.9 kJ/mol) I (EtOH); <sup>1</sup>H NMR (300 MHz, CDCl<sub>3</sub>, 25°C):  $\delta$ =8.52 (s, 2H; 7-H), 7.78 (d, <sup>3</sup>*J*=8.0 Hz, 2H; 4-H), 7.58 (d, <sup>3</sup>*J*=8.1 Hz, 4H; 2'-H and 6'-H), 7.47 (dd, <sup>3</sup>*J*=8.0 Hz, <sup>4</sup>*J*=1.2 Hz, 2H; 5-H), 7.28 (d, <sup>3</sup>*J*=8.1 Hz, 4H; 3'-H and 5'-H), 2.65 (t, <sup>3</sup>*J*=7.8 Hz, 4H;  $\alpha$ -CH<sub>2</sub>), 2.57 (s, 6H; NCOCH<sub>3</sub>), 1.64 (m, 4H;  $\beta$ -CH<sub>2</sub>), 1.38-1.18 (m, 36H; CH<sub>2</sub>), 0.86 ppm (t, <sup>3</sup>*J*=7.8 Hz, 6H; CH<sub>3</sub>); <sup>13</sup>C NMR (75.5 MHz, CDCl<sub>3</sub>, 25°C):  $\delta$ =183.52 (s; C-3), 170.15 (s; NCOCH<sub>3</sub>), 150.22 (s; C-6), 149.80 (s; C-7a), 144.25 (s; C-4'), 137.00 (s; C1'), 129.11 (d; C-3' and C-5'), 127.47 (d; C-2' and C-6'), 126.87 (s; C-2), 124.59, 124.04 [two signals: (d; C-4) and (d; C-5)], 120.43 (s; C-3a), 115.34 (d, C-7), 35.69 (t;  $\alpha$ -CH<sub>2</sub>), 31.92 (t; CH<sub>2</sub>), 31.40 (t;  $\beta$ -CH<sub>2</sub>), 29.80, 29.67, 29.59, 29.51, 29.35 (5 × t; CH<sub>2</sub>), 24.01 (q; NCOCH<sub>3</sub>), 22.69 (t; CH<sub>2</sub>), 14.13 ppm (q; CH<sub>3</sub>); IR (ATR):  $\tilde{\nu}$ =2921 (s), 2851 (s), 1699 (s), 1602 (s), 1561 (m), 1463 (w), 1431 (m), 1402 (m), 1363 (m), 1302 (m), 1240 (m), 1181 (w), 1096 (s), 1068 (w), 1005 (w), 969 (w), 915 (w), 888 (w), 822 (w), 776 (w), 718 (w), 688 cm<sup>-1</sup> (w); UV/Vis (CHCl<sub>3</sub>, 10 mg/L)  $\lambda_{\text{max}}$ : 253 (m), 311 (m), 381 nm (m); elemental analysis calcd (%) for C<sub>56</sub>H<sub>70</sub>N<sub>2</sub>O<sub>4</sub>: C 80.53, H 8.45, N 3.35, found: C 80.53, H 8.42, N 3.30.

### *N,N'*-Diacetyl-6,6'-bis-(2-fluoro-4-(dodecyloxy)phenyl)indigo (**24**)

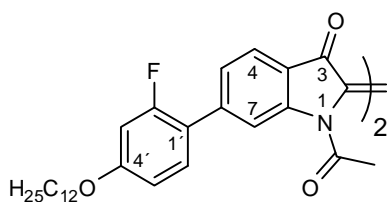

**24**

0.10 mmol (0.081 g) **21** have been converted and purified according to general procedure C yielding 0.058 g (73%) **24** as a red solid.  $R_f=0.07/0.23$  (SiO<sub>2</sub>, DCM); m.p. Cr 140.7 (15.5) SmA 145.9 (1.3) N 149.3 °C (1.9

kJ/mol) I (EtOH); <sup>1</sup>H NMR (300 MHz, CDCl<sub>3</sub>, 25°C): δ=8.41 (s, 2H; 7-H), 7.77 (d, <sup>3</sup>J=8.0 Hz, 2H; 4-H), 7.41 (d, <sup>3</sup>J=8.4 Hz, 2H; 5-H), 7.40 (m, 2H; 6'-H), 6.78 (dd, <sup>3</sup>J=8.5 Hz, <sup>4</sup>J=2.2 Hz, 2H; 5'-H), 6.70 (dd, <sup>3</sup>J<sub>H,F</sub>=12.7 Hz, <sup>4</sup>J=2.3 Hz, 2H; 3'-H), 3.98 (t, <sup>3</sup>J=6.5 Hz, 4H; α-CH<sub>2</sub>), 2.56 (s, 6H; NCOCH<sub>3</sub>), 1.79 (m, 4H; β-CH<sub>2</sub>), 1.45 (m, 4H; γ-CH<sub>2</sub>), 1.38-1.20 (m, 32H; CH<sub>2</sub>), 0.86 ppm (t, <sup>3</sup>J=6.6 Hz, 6H; CH<sub>3</sub>); <sup>13</sup>C NMR (75.5 MHz, CDCl<sub>3</sub>, 25°C): δ=183.51 (s; C-3), 170.06 (s; NCOCH<sub>3</sub>), 161.08 (s, <sup>3</sup>J<sub>C,F</sub>=11.5 Hz; C-4'), 160.44 (s, <sup>1</sup>J<sub>C,F</sub>=249.9 Hz; C-2'), 149.40 (s; C-7a), 144.96 (s; C-6), 131.14 (d, <sup>3</sup>J<sub>C,F</sub>=4.5 Hz; C-6'), 126.70 (s; C-2), 125.87 (d; C-5), 124.14 (d; C-4), 120.42 (s; C-3a), 119.81 (s, <sup>2</sup>J<sub>C,F</sub>=13.0 Hz; C-1'), 117.05 (d; C-7), 111.17 (d; C-5'), 102.68 (d, <sup>2</sup>J<sub>C,F</sub>=26.0 Hz; C-3'), 68.57 (t; α-CH<sub>2</sub>), 31.90, 29.63, 29.58, 29.34 (4 × t; CH<sub>2</sub>), 29.05 (t; β-CH<sub>2</sub>), 25.96 (t; γ-CH<sub>2</sub>), 23.99 (q; NCOCH<sub>3</sub>), 22.68 (t; CH<sub>2</sub>), 14.11 ppm (q; CH<sub>3</sub>); <sup>19</sup>F NMR (282.2 MHz, CDCl<sub>3</sub>, 25 °C): δ=-114.02 ppm (m; 2'-F); IR (ATR):  $\tilde{\nu}$  =2919 (s), 2850 (m), 1702 (m), 1604 (s), 1565 (m), 1548 (m), 1514 (m), 1466 (m), 1432 (w), 1410 (m), 1363 (m), 1323 (s), 1289 (s), 1228 (m), 1184 (m), 1164 (m), 1095 (s), 1034 (w), 1004 (w), 970 (m), 909 (w), 875 (w), 848 (w), 831 (w), 769 (w), 746 (w), 715 (w), 688 (w), 647 cm<sup>-1</sup> (w); UV/Vis (CHCl<sub>3</sub>, 10 mg/L)  $\lambda_{max}$ : 256 (s), 311 (m), 381 nm (m); elemental analysis calcd (%) for C<sub>56</sub>H<sub>68</sub>F<sub>2</sub>N<sub>2</sub>O<sub>6</sub>: C 74.47, H 7.59, N 3.10, found: C 74.46, H 7.62, N 3.10.

### *N,N'*-Diacetyl-6,6'-bis-(4-(dodecyloxy)-2-methylphenyl)indigo (**25**)

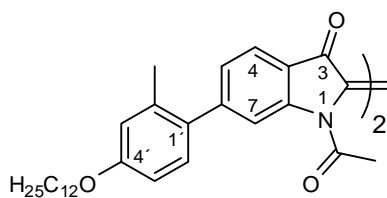

**25**

0.20 mmol (0.162 g) **22** have been converted and purified according to general procedure C yielding 0.135 g (83%) **25** as a red solid.  $R_f=0.10/0.30$  (SiO<sub>2</sub>, DCM); m.p. Cr 198.0 °C (50.3 kJ/mol) I (EtOH); <sup>1</sup>H NMR (300 MHz,

CDCl<sub>3</sub>, 25°C): δ=8.23 (s, 2H; 7-H), 7.75 (d, <sup>3</sup>J=7.9 Hz, 2H; 4-H), 7.20 (dd, <sup>3</sup>J=7.8 Hz, <sup>4</sup>J=1.1 Hz, 2H; 5-H), 7.16 (d, <sup>3</sup>J=8.3 Hz, 2H; 6'-H), 6.81 (s, 2H; 3'-H), 6.79 (dd, <sup>3</sup>J=8.5 Hz, <sup>4</sup>J=2.3 Hz, 2H; 5'-H), 3.98 (t, <sup>3</sup>J=6.5 Hz, 4H; α-CH<sub>2</sub>), 2.56 (s, 6H; NCOCH<sub>3</sub>), 2.29 (s, 6H; 2'-CH<sub>3</sub>), 1.79 (m, 4H; β-CH<sub>2</sub>), 1.46 (m, 4H; γ-CH<sub>2</sub>), 1.38-1.18 (m, 32H; CH<sub>2</sub>), 0.87 ppm (t, <sup>3</sup>J=6.5 Hz,



6H; alkyl-CH<sub>3</sub>); <sup>13</sup>C NMR (75.5 MHz, CDCl<sub>3</sub>, 25°C): δ=183.62 (s; C-3), 170.02 (s; NCOCH<sub>3</sub>), 159.17 (s; C-4'), 151.31 (s; C-6), 149.16 (s; C-7a), 136.62 (s; C-2'), 132.96 (s; C-1'), 130.67 (d; C-6'), 126.79 (s; C-2), 126.64 (d; C-5), 123.81 (d; C-4), 120.14 (s; C-3a), 118.01 (d; C-7), 116.70 (d; C-3'), 111.91 (d; C-5'), 68.01 (t; α-CH<sub>2</sub>), 31.90, 29.59, 29.38, 29.33 (4 × t; CH<sub>2</sub>), 29.26 (t; β-CH<sub>2</sub>), 26.04 (t; γ-CH<sub>2</sub>), 23.98 (q; NCOCH<sub>3</sub>), 22.67 (t; CH<sub>2</sub>), 20.82 (q; C-2'-CH<sub>3</sub>), 14.10 ppm (q; alkyl-CH<sub>3</sub>); IR (ATR):  $\tilde{\nu}$ =2920 (s), 2850 (s), 1701 (s), 1600 (s), 1507 (w), 1467 (m), 1425 (m), 1363 (m), 1320 (m), 1286 (m), 1234 (s), 1196 (m), 1099 (s), 1066 (w), 970 (w), 903 (w), 863 (w), 840 (w), 813 (w), 780 (w), 743 (w), 723 (w), 700 cm<sup>-1</sup> (w); UV/Vis (CHCl<sub>3</sub>, 10 mg/L)  $\lambda_{\text{max}}$ : 281 (s), 393 nm (s); elemental analysis calcd (%) for C<sub>58</sub>H<sub>74</sub>N<sub>2</sub>O<sub>6</sub>: C 77.82, H 8.33, N 3.13, found: C 77.86, H 8.30, N 3.08.

# UV-Vis Spectra

## PO12-4,4'-Indi (8)

1 Aug 2008

|                     |                            |                        |                     |                      |                         |
|---------------------|----------------------------|------------------------|---------------------|----------------------|-------------------------|
| <b>File Name</b>    | G:\JAPO2\INDIGO IN NMP.CSV |                        | <b>Date</b>         | 19 Mar 2007 20:16:46 |                         |
| <b>Technique</b>    | UV-Visible                 | <b>Spectral Region</b> | UV-Vis-NIR          | <b>X Axis</b>        | Wavelength (nanometers) |
| <b>Y Axis</b>       | Arbitrary                  | <b>Spectrum Range</b>  | 200.0000 - 800.0000 |                      |                         |
| <b>Points Count</b> | 601                        | <b>Data Spacing</b>    | 1.0000              |                      |                         |

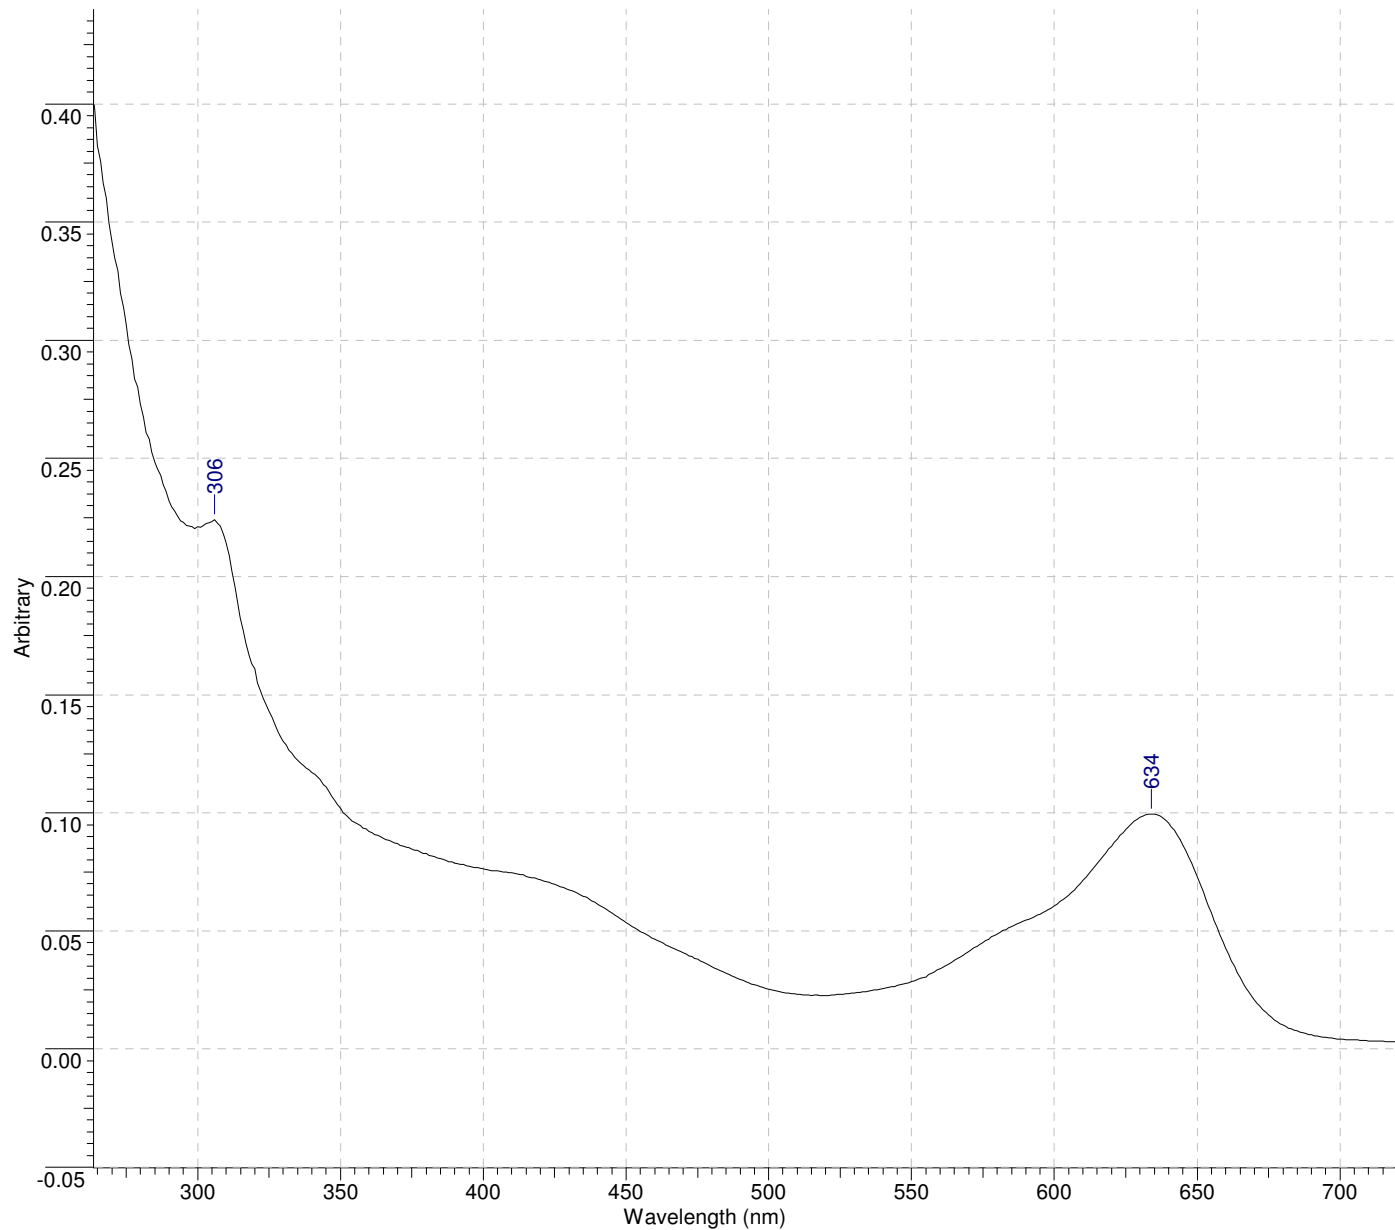

| No | nm     | Arbitrary | Intensity |
|----|--------|-----------|-----------|
| 1  | 306.00 | 0.224     | W         |
| 2  | 634.00 | 0.100     | VW        |

# PO12-5,5'-Indi (9)

1 Aug 2008

|                     |                            |                        |                     |                      |                         |
|---------------------|----------------------------|------------------------|---------------------|----------------------|-------------------------|
| <b>File Name</b>    | G:\JAPO2\INDIGO IN NMP.CSV |                        | <b>Date</b>         | 19 Mar 2007 20:16:46 |                         |
| <b>Technique</b>    | UV-Visible                 | <b>Spectral Region</b> | UV-Vis-NIR          | <b>X Axis</b>        | Wavelength (nanometers) |
| <b>Y Axis</b>       | Arbitrary                  | <b>Spectrum Range</b>  | 200.0000 - 800.0000 |                      |                         |
| <b>Points Count</b> | 601                        | <b>Data Spacing</b>    | 1.0000              |                      |                         |

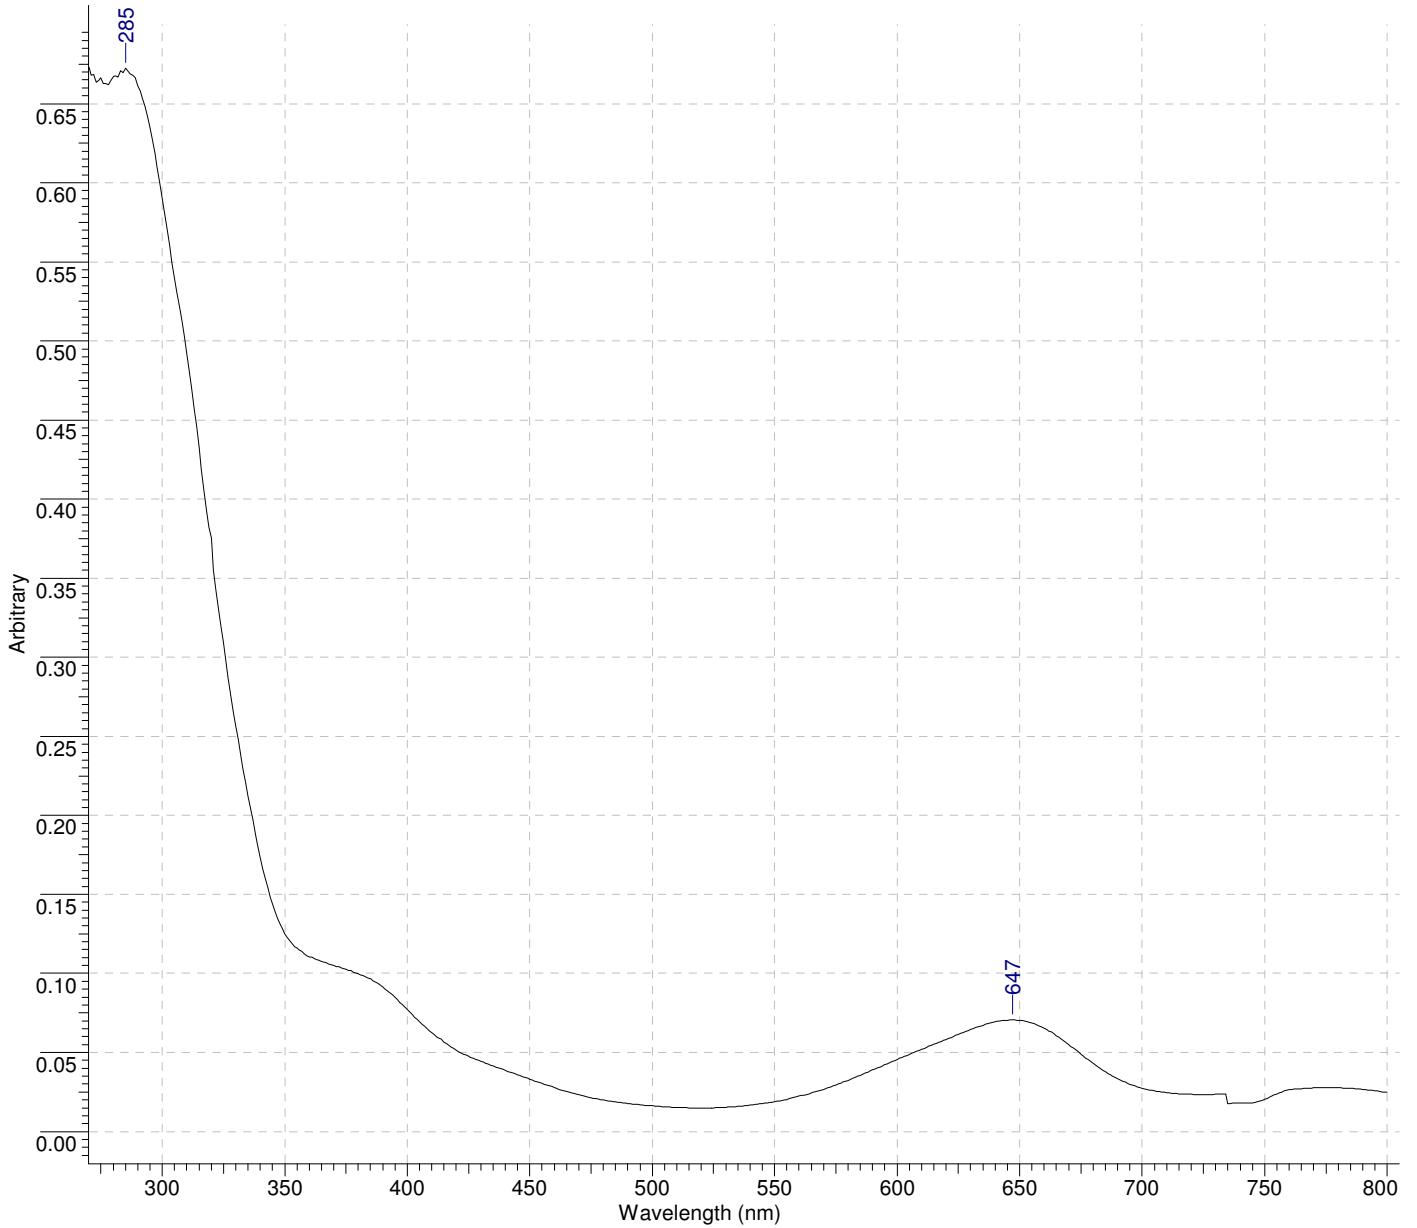

| No | nm     | Arbitrary | FWHH   | Asym  | Intensity |
|----|--------|-----------|--------|-------|-----------|
| 1  | 285.00 | 0.672     | 72.82  | 0.06  | W         |
| 2  | 647.00 | 0.071     | 103.17 | -0.54 | VW        |

# PO12-6,6'-Indi (10)

1 Aug 2008

|                     |                            |                        |                     |                      |                         |
|---------------------|----------------------------|------------------------|---------------------|----------------------|-------------------------|
| <b>File Name</b>    | G:\JAPO2\INDIGO IN NMP.CSV |                        | <b>Date</b>         | 19 Mar 2007 20:16:46 |                         |
| <b>Technique</b>    | UV-Visible                 | <b>Spectral Region</b> | UV-Vis-NIR          | <b>X Axis</b>        | Wavelength (nanometers) |
| <b>Y Axis</b>       | Arbitrary                  | <b>Spectrum Range</b>  | 200.0000 - 800.0000 |                      |                         |
| <b>Points Count</b> | 601                        | <b>Data Spacing</b>    | 1.0000              |                      |                         |

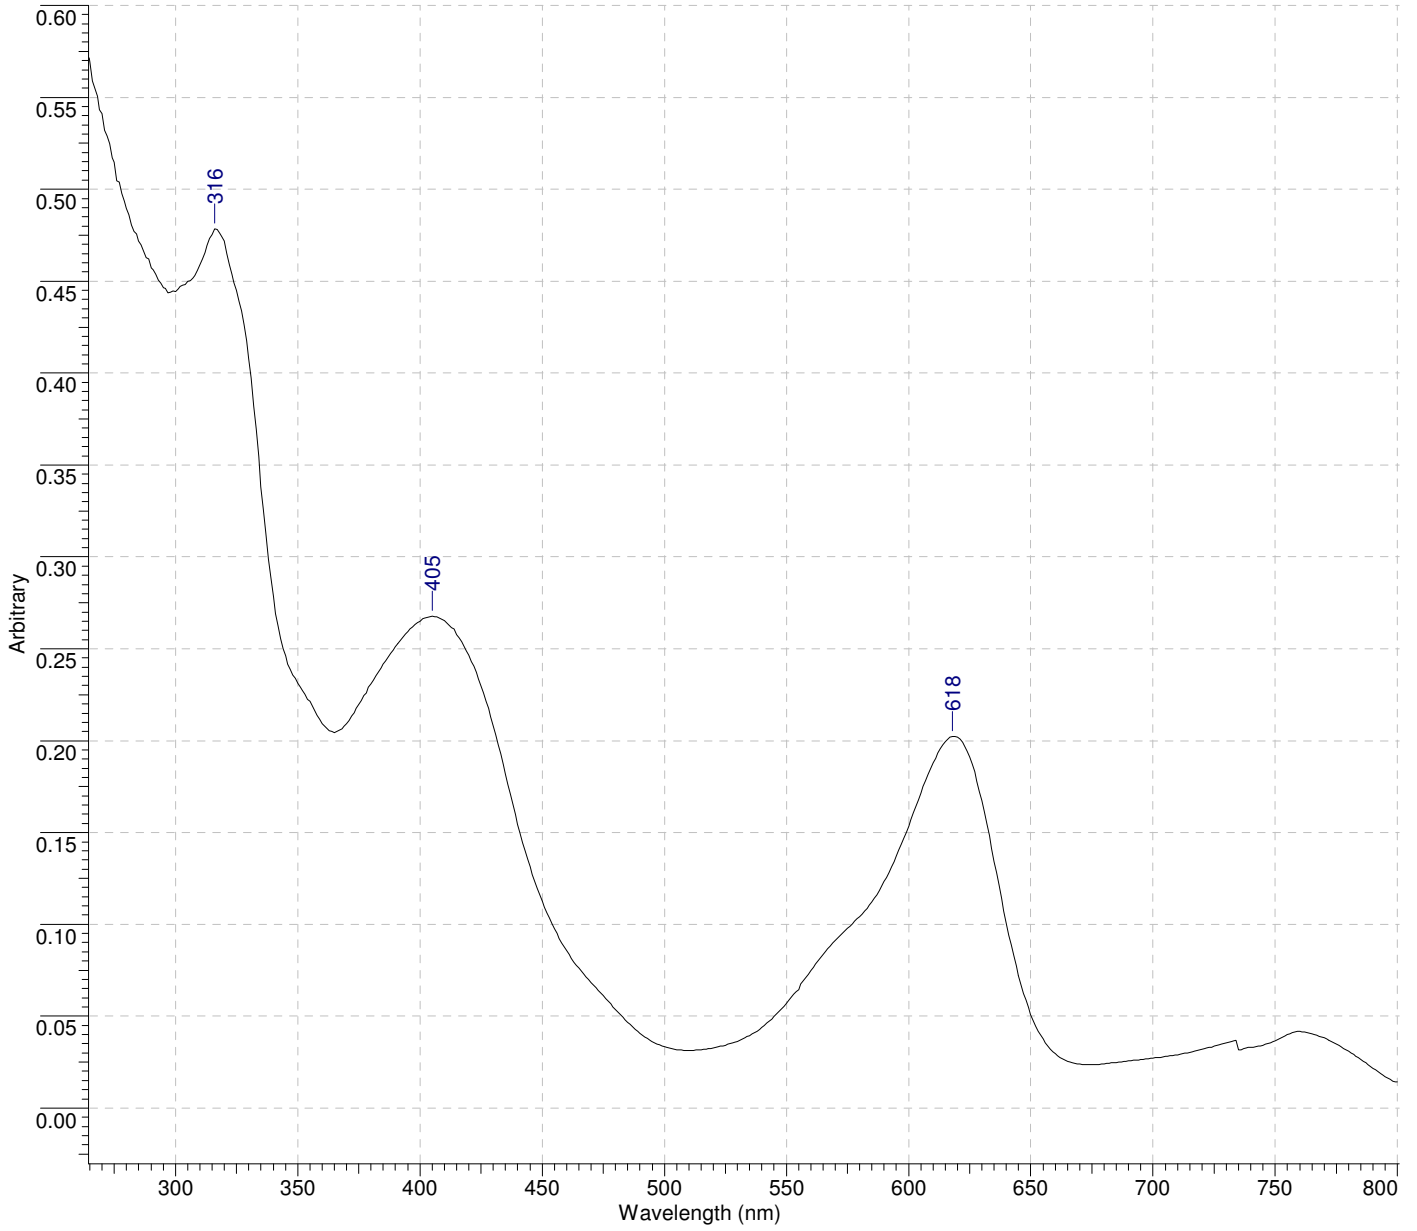

| No | nm     | Arbitrary | Intensity |
|----|--------|-----------|-----------|
| 1  | 316.00 | 0.479     | W         |
| 2  | 405.00 | 0.268     | W         |
| 3  | 618.00 | 0.202     | W         |

# PO12-7,7'-Indi (11)

1 Aug 2008

|                     |                            |                        |                     |                      |                         |
|---------------------|----------------------------|------------------------|---------------------|----------------------|-------------------------|
| <b>File Name</b>    | G:\JAPO2\INDIGO IN NMP.CSV |                        | <b>Date</b>         | 19 Mar 2007 20:16:46 |                         |
| <b>Technique</b>    | UV-Visible                 | <b>Spectral Region</b> | UV-Vis-NIR          | <b>X Axis</b>        | Wavelength (nanometers) |
| <b>Y Axis</b>       | Arbitrary                  | <b>Spectrum Range</b>  | 200.0000 - 800.0000 |                      |                         |
| <b>Points Count</b> | 601                        | <b>Data Spacing</b>    | 1.0000              |                      |                         |

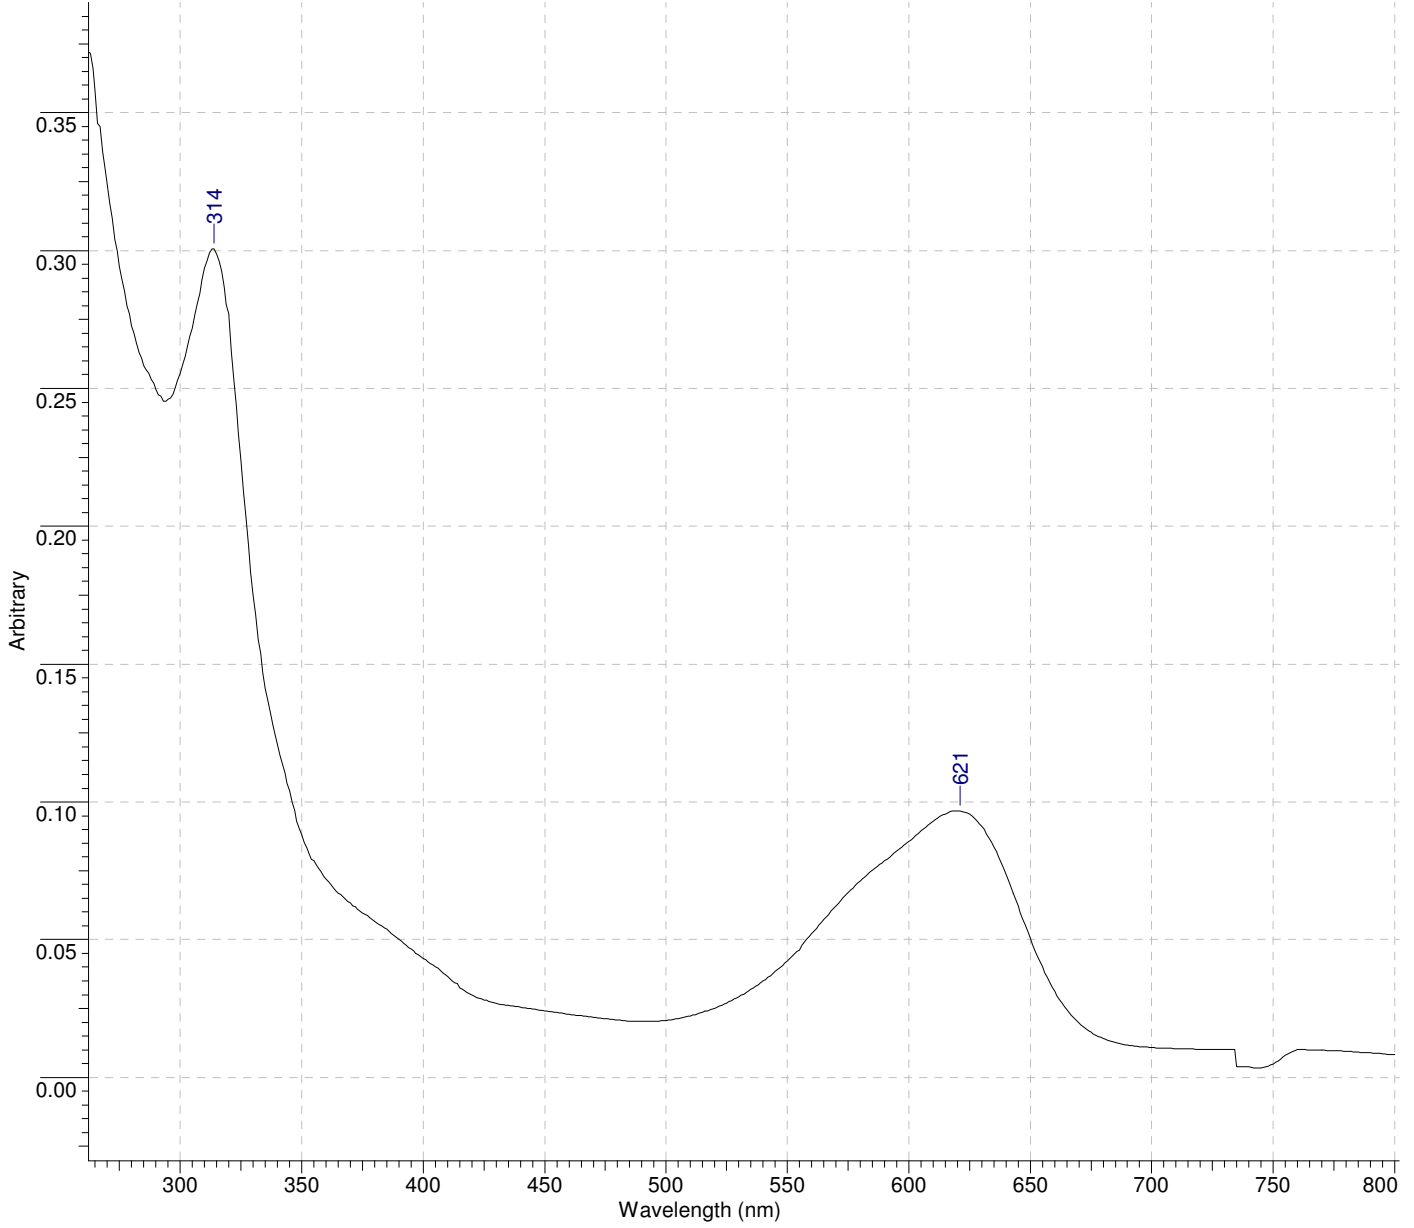

| No | nm     | Arbitrary | Intensity |
|----|--------|-----------|-----------|
| 1  | 314.00 | 0.301     | W         |
| 2  | 621.00 | 0.097     | VW        |

# PO12-5,5'-Indi-N,N'-Ac (12)

1 Aug 2008

|                     |                                |                                           |             |                      |                         |
|---------------------|--------------------------------|-------------------------------------------|-------------|----------------------|-------------------------|
| <b>File Name</b>    | G:\JAPO\ACETYLIERTEINDIGOS.CSV |                                           | <b>Date</b> | 18 Mar 2007 20:30:52 |                         |
| <b>Technique</b>    | UV-Visible                     | <b>Spectral Region</b>                    | UV-Vis-NIR  | <b>X Axis</b>        | Wavelength (nanometers) |
| <b>Y Axis</b>       | Arbitrary                      | <b>Spectrum Range</b> 200.0000 - 800.0000 |             |                      |                         |
| <b>Points Count</b> | 601                            | <b>Data Spacing</b> 1.0000                |             |                      |                         |

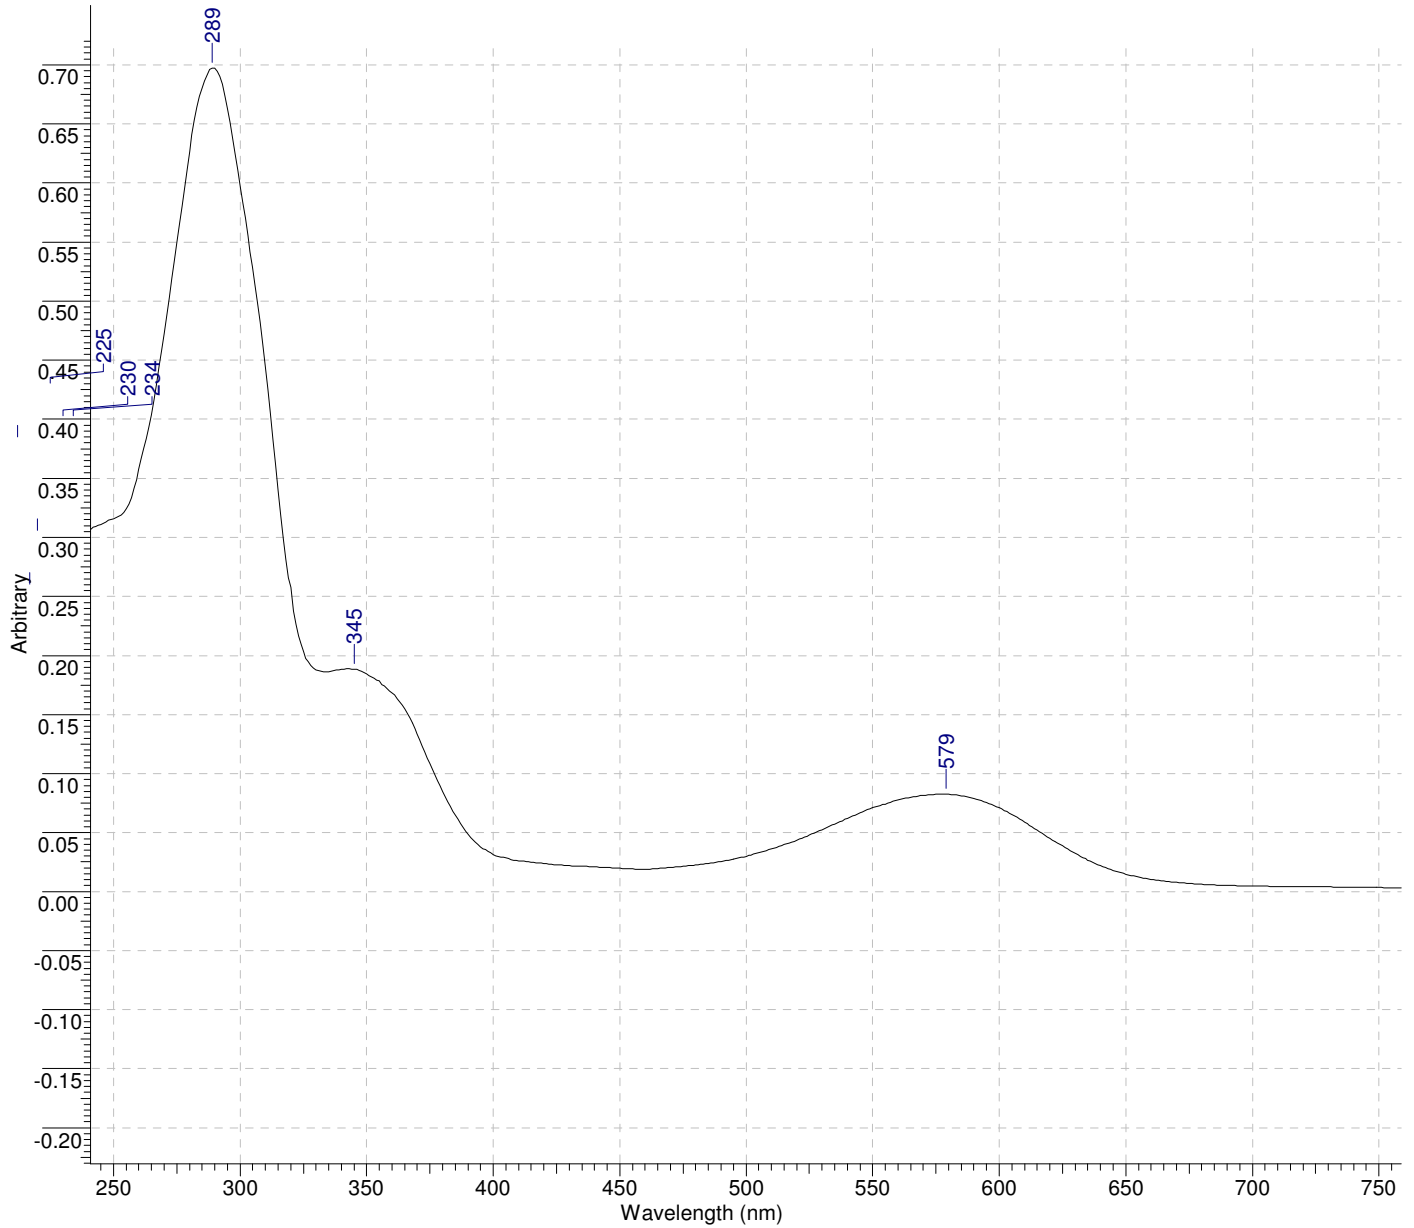

| No | nm     | Arbitrary | FWHH   | Asym  | Intensity |
|----|--------|-----------|--------|-------|-----------|
| 1  | 203.00 | 0.398     | 0.71   | -0.15 | S         |
| 2  | 212.00 | 0.380     | -      | -     | S         |
| 3  | 217.00 | 0.255     | 1.04   | -0.63 | M         |
| 4  | 220.00 | 0.301     | -      | -     | M         |
| 5  | 225.00 | 0.426     | 1.99   | -0.61 | S         |
| 6  | 230.00 | 0.398     | -      | -     | S         |
| 7  | 234.00 | 0.398     | -      | -     | S         |
| 8  | 289.00 | 0.697     | 55.59  | -0.17 | VS        |
| 9  | 345.00 | 0.188     | -      | -     | M         |
| 10 | 579.00 | 0.083     | 105.63 | -0.41 | M         |

# PO12-6,6'-Indi-N,N'-Ac (13)

1 Aug 2008

|                     |                                |                                           |             |                      |                         |
|---------------------|--------------------------------|-------------------------------------------|-------------|----------------------|-------------------------|
| <b>File Name</b>    | G:\JAPO\ACETYLIERTEINDIGOS.CSV |                                           | <b>Date</b> | 18 Mar 2007 20:30:52 |                         |
| <b>Technique</b>    | UV-Visible                     | <b>Spectral Region</b>                    | UV-Vis-NIR  | <b>X Axis</b>        | Wavelength (nanometers) |
| <b>Y Axis</b>       | Arbitrary                      | <b>Spectrum Range</b> 200.0000 - 800.0000 |             |                      |                         |
| <b>Points Count</b> | 601                            | <b>Data Spacing</b> 1.0000                |             |                      |                         |

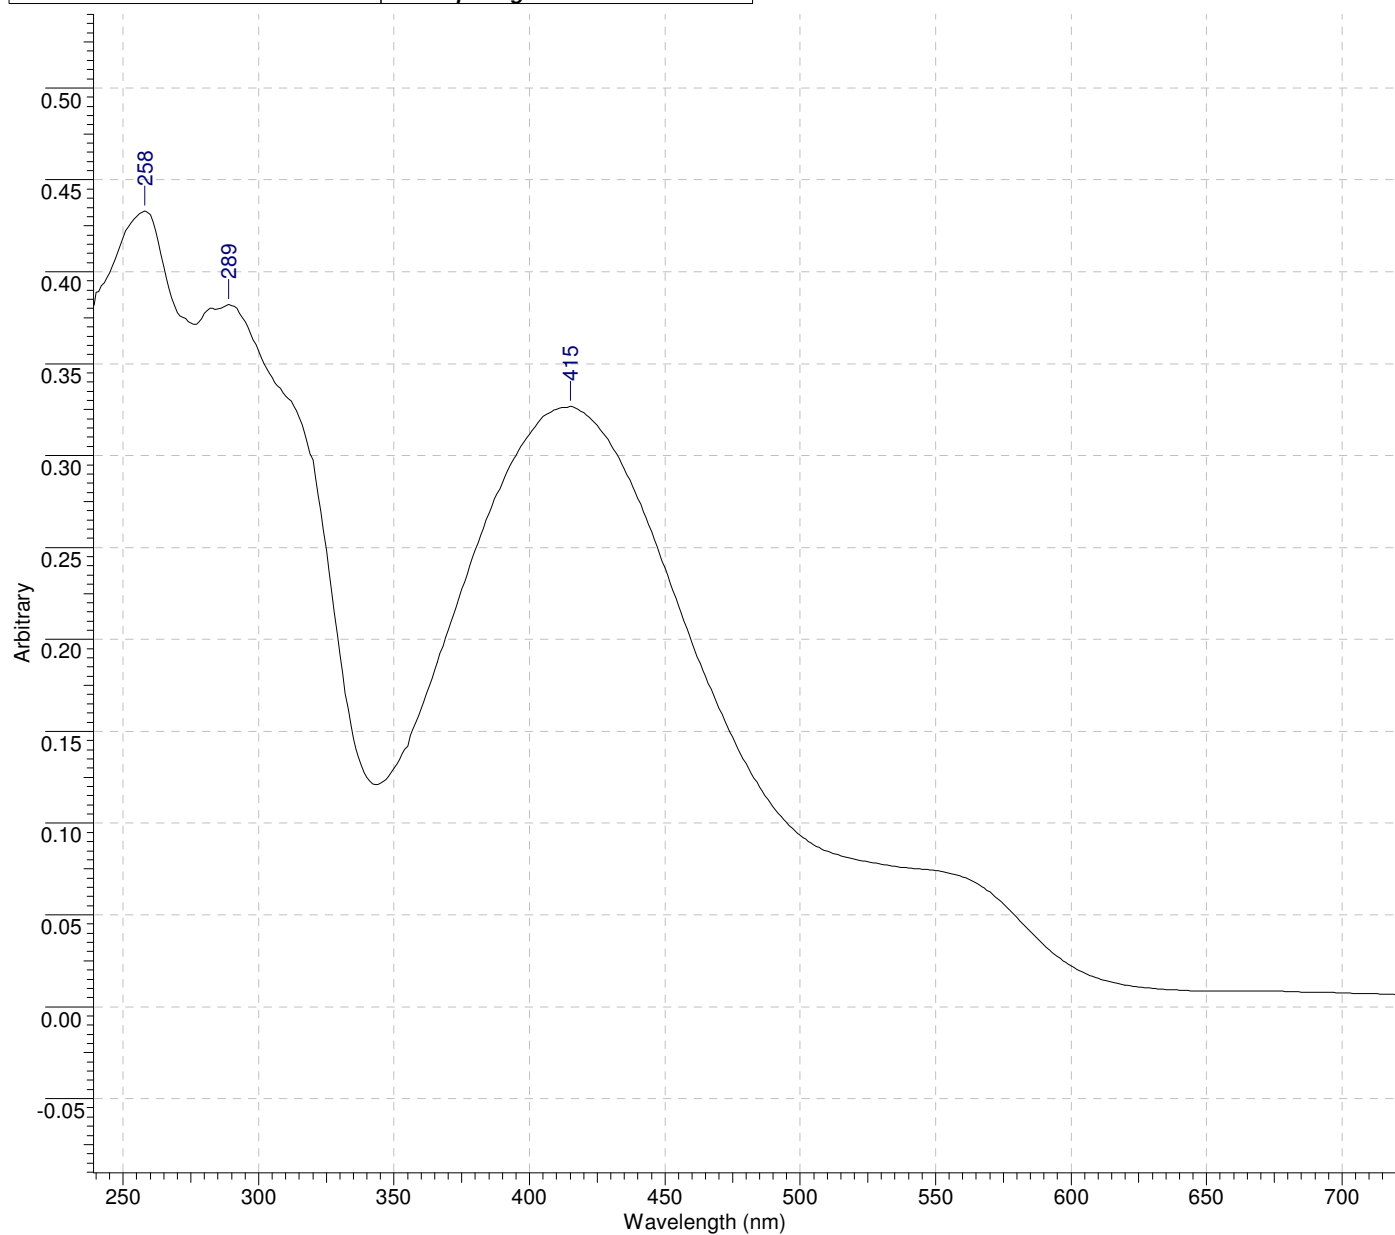

| No | nm     | Arbitrary | FWHH   | Asym  | Intensity |
|----|--------|-----------|--------|-------|-----------|
| 1  | 258.00 | 0.433     | -      | -     | S         |
| 2  | 289.00 | 0.382     | -      | -     | S         |
| 3  | 415.00 | 0.327     | 109.55 | -0.00 | S         |

## Calculation of the Order Parameter S:

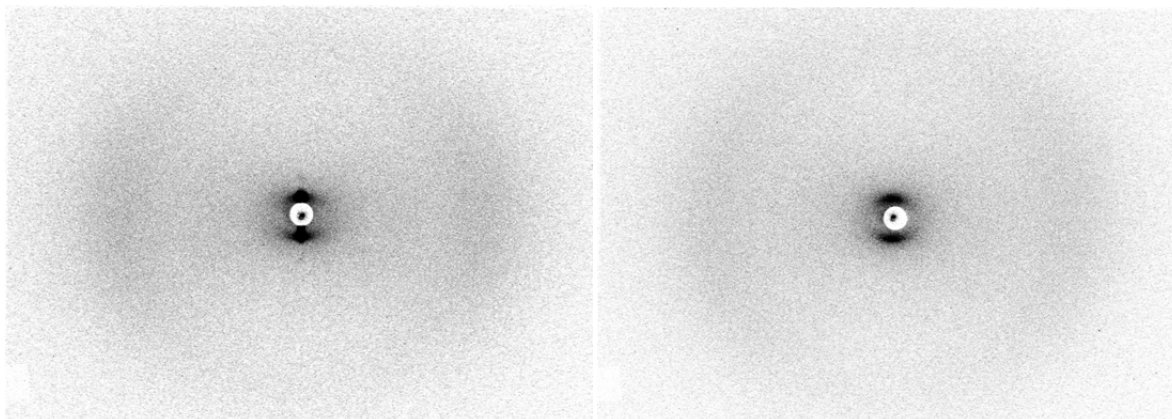

**Figure 1:** Wide angle diffractogram of the LC phases of **24**. Left: SmA-phase at 144 °C (irradiation: 20 min, cooled from 148 °C with 0.2 K/min), right: N-phase at 148 °C (irradiation: 15 min, cooled from 155 °C with 0.2 K/min).

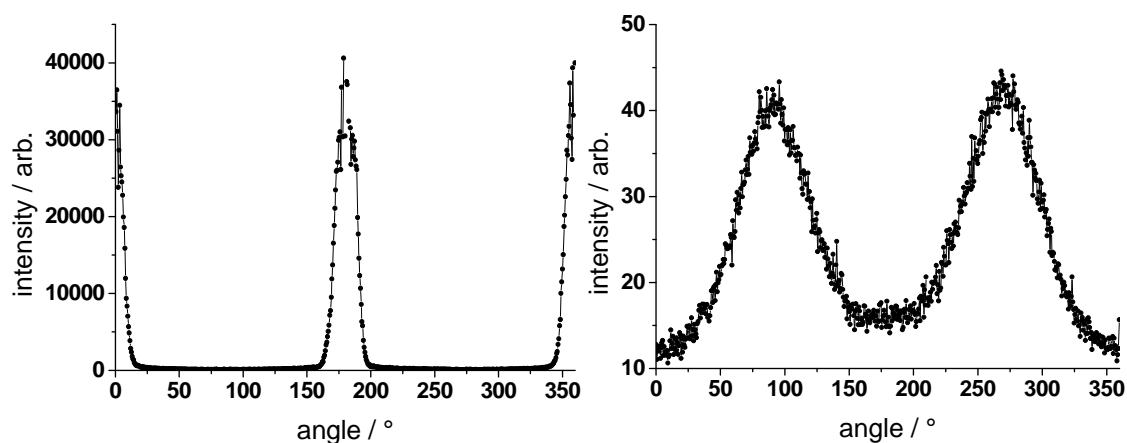

**Figure 2:** Integration of circular sectors of the diffractogram in Figure 1 left (SmA-phase of **24**) in the small angle area (left) and in the wide angle area (right).

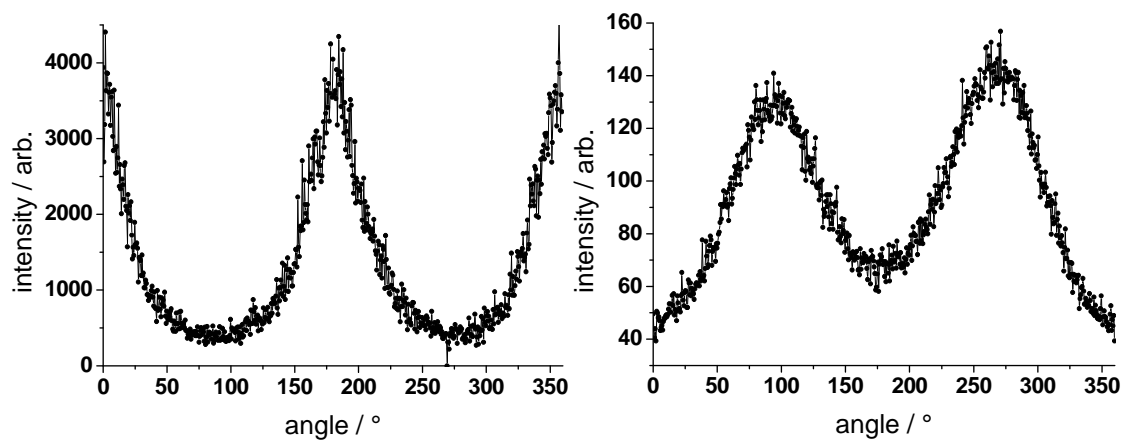

**Figure 3:** Integration of circular sectors of the diffractogram in Figure 1 right (N-phase of **24**) in the small angle area (left) and in the wide angle area (right).



The order parameter  $S$  was calculated from the wide angle diffractograms according to the method of Davidson *et al.*<sup>[2]</sup> Both sides of each wide angle diffractogram (**Figure 2**, right and **Figure 3**, right) were added and the minimum value was set to zero. (**Figure 4**). The intensity profile  $I(\chi)$  was fitted to equation 1.

$$I(\chi) = \sum_{n=0}^{\infty} \frac{f_{2n} 2^n n!}{(2n+1)!!} \cos^{2n}(\chi) = f_0 + \frac{2}{3} f_2 \cos^2 \chi + \frac{8}{15} f_4 \cos^4 \chi + \frac{16}{35} f_6 \cos^6 \chi + \dots \quad (1)$$

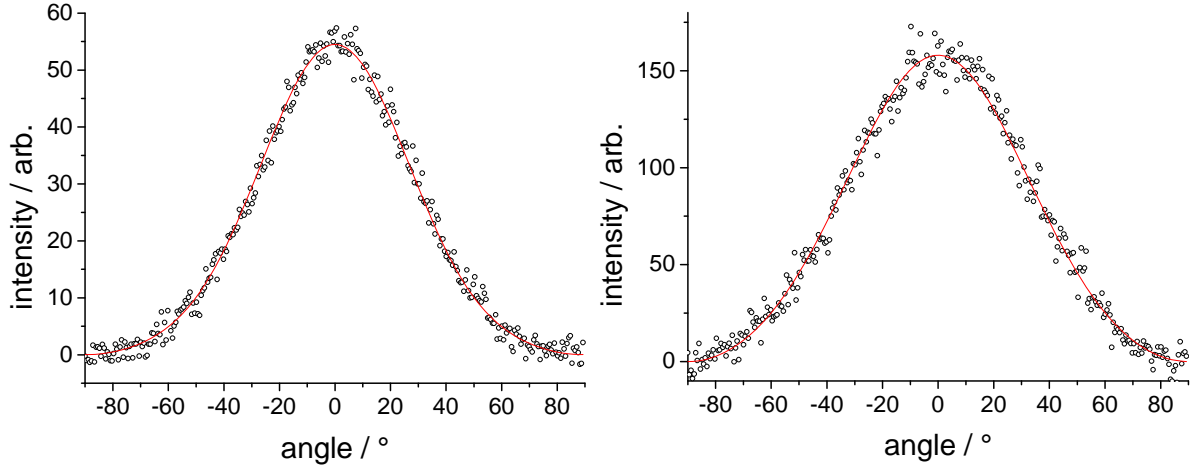

**Figure 4:** Averaged intensity profile  $I(\chi)$  from the wide angle reflexes of the LC phases of **24** (left: SmA phase, right N-phase) each with the fit graph of function 1.

**Table 1:** Fit parameters  $f_{2n}$  of the LC phases of **24** and the calculated orderparameters  $S$ .

|              | $f_0$   | $f_2$     | $f_4$    | $f_6$    | $S$     |
|--------------|---------|-----------|----------|----------|---------|
| SmA (144 °C) | 0.00443 | 23.3065   | 17.30246 | 65.0806  | 0.54956 |
| N (148 °C)   | 0.01574 | 132.12652 | 83.47749 | 55.55415 | 0.47239 |

The received fit parameters  $f_{2n}$  (**Table 1**) were introduced in the Legendre-polynome (2) of the distribution function and the order parameter was calculated according to equation 3.

$$\langle \cos^2 \theta \rangle = \frac{\sum_{n=0}^{\infty} \frac{1}{2n+3} f_{2n}}{\sum_{n=0}^{\infty} \frac{1}{2n+1} f_{2n}} = \frac{\frac{1}{3} f_0 + \frac{1}{5} f_2 + \frac{1}{7} f_4 + \frac{1}{9} f_6 + \dots}{f_0 + \frac{1}{3} f_2 + \frac{1}{5} f_4 + \frac{1}{7} f_6 + \dots} \quad (2)$$

$$S = \frac{1}{2} (3 \langle \cos^2 \theta \rangle - 1) \quad (3)$$

## Quantum mechanical Calculations (DFT):

The geometries and energies of all compounds were computed in Gaussian 03<sup>[3]</sup> on a DFT level of theory with the B3LYP density functional<sup>[4]</sup> and the 6-311G(d) basis set. The energetic and atomic parameters are summarized in **Table 3** (*N,N'*-diacetyl indigo in the „twisted“C<sub>2</sub>-symmetric conformation), **Table 4** (*N,N'*-diacetyl indigo in the “stepped” C<sub>i</sub>-symmetric conformation), **Table 5** (5,5'-bis-(4-ethylphenyl)-*N,N'*-diacetyl indigo in C<sub>2</sub>-symmetry), **Table 6** (5,5'-bis-(4-methoxyphenyl)-*N,N'*-diacetyl indigo in C<sub>2</sub>-symmetry), **Table 7** (6,6'-bis-(4-ethylphenyl)-*N,N'*-diacetyl indigo in C<sub>2</sub>-symmetry) and **Table 8** (6,6'-bis-(4-methoxyphenyl)-*N,N'*-diacetyl indigo in C<sub>2</sub>-symmetry).

The energetic difference  $\Delta H$  was for the total energy and the sum of electronic and zero-point Energies and are presented in **Table 2**. A conversion factor of 2625.50 was used to convert Hartree into kJ/mol.

**Table 2:**Energy differences between the C<sub>2</sub> and the C<sub>i</sub> symmetric conformer of *N,N'*-diacetyl indigo.

|                                   | C <sub>2</sub> | C <sub>i</sub> | $\Delta H$ [Hartree] | $\Delta H$ [kJ/mol] |
|-----------------------------------|----------------|----------------|----------------------|---------------------|
| Total energy                      | -1181,24424516 | -1181,23155204 | 0.01269312           | 33.326              |
| sum of electronic and ZP energies | -1180,944413   | -1180,932185   | 0.012228             | 32.105              |

**Table 3:**Summary of the energetic and atomic parameters of the C<sub>2</sub>-symmetric conformation of *N,N'*-diacetyl indigo (DAIndigo\_C2\_1\_freq.log).

|                                              |                |
|----------------------------------------------|----------------|
| E(RB+HF-LYP) =                               | -1181,24424516 |
| Sum of electronic and zero-point Energies=   | -1180,944413   |
| Sum of electronic and thermal Energies=      | -1180,923197   |
| Sum of electronic and thermal Enthalpies=    | -1180,922253   |
| Sum of electronic and thermal Free Energies= | -1180,993651   |
| Zero-point correction=                       | 0,299832       |
| (Hartree/Particle)                           |                |
| Thermal correction to Energy=                | 0,321048       |
| Thermal correction to Enthalpy=              | 0,321993       |
| Thermal correction to Gibbs Free Energy=     | 0,250594       |
| Entropy (cal/mol) =                          | 150,271        |
| Number of imaginary frequencies = 0          |                |
| Standard orientation:                        |                |

| Center Number | Atomic Number | Atomic Type | Coordinates (Angstroms) |           |           |
|---------------|---------------|-------------|-------------------------|-----------|-----------|
|               |               |             | X                       | Y         | Z         |
| 1             | 6             | 0           | 1.109957                | -2.614190 | -0.573133 |
| 2             | 6             | 0           | 1.920071                | -3.590623 | -1.146446 |
| 3             | 6             | 0           | 1.358357                | -4.829331 | -1.429838 |
| 4             | 6             | 0           | 0.011547                | -5.067269 | -1.130846 |
| 5             | 6             | 0           | -0.809125               | -4.098064 | -0.549640 |
| 6             | 6             | 0           | -0.236042               | -2.859615 | -0.271307 |
| 7             | 1             | 0           | 2.958981                | -3.367539 | -1.363714 |
| 8             | 1             | 0           | -1.847008               | -4.294311 | -0.333672 |

|    |   |   |           |           |           |     |
|----|---|---|-----------|-----------|-----------|-----|
| 9  | 6 | 0 | 0.143633  | -0.666597 | 0.311164  | C2' |
| 10 | 8 | 0 | -2.517643 | 0.671681  | -0.260808 |     |
| 11 | 6 | 0 | -1.452080 | 1.250114  | -0.163681 | C3  |
| 12 | 6 | 0 | -1.109957 | 2.614190  | -0.573133 |     |
| 13 | 6 | 0 | -0.143633 | 0.666597  | 0.311164  | C2  |
| 14 | 6 | 0 | 0.236042  | 2.859615  | -0.271307 |     |
| 15 | 6 | 0 | -1.920071 | 3.590623  | -1.146446 |     |
| 16 | 7 | 0 | 0.809125  | 1.702095  | 0.338848  | N   |
| 17 | 6 | 0 | 0.809125  | 4.098064  | -0.549640 |     |
| 18 | 6 | 0 | -1.358357 | 4.829331  | -1.429838 |     |
| 19 | 1 | 0 | -2.958981 | 3.367539  | -1.363714 |     |
| 20 | 6 | 0 | -0.011547 | 5.067269  | -1.130846 |     |
| 21 | 1 | 0 | 1.847008  | 4.294311  | -0.333672 |     |
| 22 | 6 | 0 | 1.452080  | -1.250114 | -0.163681 |     |
| 23 | 8 | 0 | 2.517643  | -0.671681 | -0.260808 |     |
| 24 | 7 | 0 | -0.809125 | -1.702095 | 0.338848  |     |
| 25 | 6 | 0 | -2.020257 | -1.771969 | 1.083580  |     |
| 26 | 6 | 0 | -2.225046 | -0.811815 | 2.232174  |     |
| 27 | 1 | 0 | -1.378164 | -0.164164 | 2.448246  |     |
| 28 | 1 | 0 | -3.098576 | -0.196457 | 2.021626  |     |
| 29 | 1 | 0 | -2.445726 | -1.419852 | 3.111886  |     |
| 30 | 8 | 0 | -2.806665 | -2.661425 | 0.863542  |     |
| 31 | 6 | 0 | 2.020257  | 1.771969  | 1.083580  |     |
| 32 | 6 | 0 | 2.225046  | 0.811815  | 2.232174  |     |
| 33 | 1 | 0 | 3.098576  | 0.196457  | 2.021626  |     |
| 34 | 1 | 0 | 2.445726  | 1.419852  | 3.111886  |     |
| 35 | 1 | 0 | 1.378164  | 0.164164  | 2.448246  |     |
| 36 | 8 | 0 | 2.806665  | 2.661425  | 0.863542  |     |
| 37 | 1 | 0 | -0.419193 | -6.036169 | -1.362007 |     |
| 38 | 1 | 0 | 0.419193  | 6.036169  | -1.362007 |     |
| 39 | 1 | 0 | -1.956061 | 5.609349  | -1.888336 |     |
| 40 | 1 | 0 | 1.956061  | -5.609349 | -1.888336 |     |

**Table 4:** Summary of the energetic and atomic parameters of the  $C_i$ -symmetric conformation of *N,N'*-diacetyl indigo (DAIndigo\_Ci\_1\_freq.log).

|                                              |                |
|----------------------------------------------|----------------|
| E(RB+HF-LYP) =                               | -1181,23155204 |
| Sum of electronic and zero-point Energies=   | -1180,932185   |
| Sum of electronic and thermal Energies=      | -1180,910990   |
| Sum of electronic and thermal Enthalpies=    | -1180,910046   |
| Sum of electronic and thermal Free Energies= | -1180,982144   |
| Zero-point correction=                       | 0,299367       |
| (Hartree/Particle)                           |                |
| Thermal correction to Energy=                | 0,320562       |
| Thermal correction to Enthalpy=              | 0,321506       |
| Thermal correction to Gibbs Free Energy=     | 0,249408       |
| Entropy (cal/mol) =                          | 151,743        |
| Number of imaginary frequencies = 0          |                |
| Standard orientation:                        |                |

| Center Number | Atomic Number | Atomic Type | Coordinates (Angstroms) |          |          |
|---------------|---------------|-------------|-------------------------|----------|----------|
|               |               |             | X                       | Y        | Z        |
| 1             | 6             | 0           | 0.814303                | 0.302780 | 2.878817 |
| 2             | 6             | 0           | 0.823127                | 0.304681 | 4.271626 |
| 3             | 6             | 0           | 2.050558                | 0.302983 | 4.922471 |
| 4             | 6             | 0           | 3.235301                | 0.305755 | 4.174862 |
| 5             | 6             | 0           | 3.238613                | 0.310862 | 2.778725 |
| 6             | 6             | 0           | 2.002776                | 0.312590 | 2.137948 |
| 7             | 1             | 0           | -0.114853               | 0.304679 | 4.816436 |

|    |   |   |           |           |           |
|----|---|---|-----------|-----------|-----------|
| 8  | 1 | 0 | 4.159306  | 0.307475  | 2.215242  |
| 9  | 6 | 0 | 0.317726  | 0.174769  | 0.576530  |
| 10 | 8 | 0 | 1.504282  | -0.338384 | -2.194153 |
| 11 | 6 | 0 | 0.314246  | -0.287949 | -1.947783 |
| 12 | 6 | 0 | -0.814303 | -0.302780 | -2.878817 |
| 13 | 6 | 0 | -0.317726 | -0.174769 | -0.576530 |
| 14 | 6 | 0 | -2.002776 | -0.312590 | -2.137948 |
| 15 | 6 | 0 | -0.823127 | -0.304681 | -4.271626 |
| 16 | 7 | 0 | -1.707713 | -0.369173 | -0.743415 |
| 17 | 6 | 0 | -3.238613 | -0.310862 | -2.778725 |
| 18 | 6 | 0 | -2.050558 | -0.302983 | -4.922471 |
| 19 | 1 | 0 | 0.114853  | -0.304679 | -4.816436 |
| 20 | 6 | 0 | -3.235301 | -0.305755 | -4.174862 |
| 21 | 1 | 0 | -4.159306 | -0.307475 | -2.215242 |
| 22 | 6 | 0 | -0.314246 | 0.287949  | 1.947783  |
| 23 | 8 | 0 | -1.504282 | 0.338384  | 2.194153  |
| 24 | 7 | 0 | 1.707713  | 0.369173  | 0.743415  |
| 25 | 6 | 0 | 2.632274  | 1.046698  | -0.124555 |
| 26 | 8 | 0 | 3.812993  | 0.850952  | 0.006724  |
| 27 | 6 | 0 | -2.632274 | -1.046698 | 0.124555  |
| 28 | 6 | 0 | -2.094930 | -2.137139 | 1.020877  |
| 29 | 1 | 0 | -2.467434 | -1.985742 | 2.032531  |
| 30 | 1 | 0 | -2.508396 | -3.077947 | 0.646045  |
| 31 | 1 | 0 | -1.010144 | -2.218488 | 1.038140  |
| 32 | 8 | 0 | -3.812993 | -0.850952 | -0.006724 |
| 33 | 1 | 0 | 2.508396  | 3.077947  | -0.646045 |
| 34 | 6 | 0 | 2.094930  | 2.137139  | -1.020877 |
| 35 | 1 | 0 | 1.010144  | 2.218488  | -1.038140 |
| 36 | 1 | 0 | 2.467434  | 1.985742  | -2.032531 |
| 37 | 1 | 0 | -4.188599 | -0.297984 | -4.693636 |
| 38 | 1 | 0 | 4.188599  | 0.297984  | 4.693636  |
| 39 | 1 | 0 | 2.096116  | 0.293307  | 6.005719  |
| 40 | 1 | 0 | -2.096116 | -0.293307 | -6.005719 |

**Table 5:** Summary of the energetic and atomic parameters of the  $C_2$ -symmetric conformation of 5,5'-bis-(4-ethylphenyl)- $N,N'$ -diacetyl indigo (55-DiPhEt-DAIndigo).

|                                              |                |
|----------------------------------------------|----------------|
| E(RB3LYP)=                                   | -1800.74272629 |
| Sum of electronic and zero-point Energies=   | -1800.169811   |
| Sum of electronic and thermal Energies=      | -1800.132775   |
| Sum of electronic and thermal Enthalpies=    | -1800.131830   |
| Sum of electronic and thermal Free Energies= | -1800.242324   |
| Zero-point correction=                       | 0.572915       |
| (Hartree/Particle)                           |                |
| Thermal correction to Energy=                | 0.609952       |
| Thermal correction to Enthalpy=              | 0.610896       |
| Thermal correction to Gibbs Free Energy=     | 0.500402       |
| Entropy (cal/mol) =                          | 232.554        |
| Number of imaginary frequencies = 0          |                |
| Standard orientation:                        |                |

| Center Number | Atomic Number | Forces (Hartrees/Bohr) |              |              |
|---------------|---------------|------------------------|--------------|--------------|
|               |               | X                      | Y            | Z            |
| 1             | 6             | -0.000011052           | -0.000000713 | -0.000017728 |
| 2             | 6             | 0.000002173            | 0.000000143  | -0.000009015 |
| 3             | 6             | -0.000011692           | 0.000001013  | 0.000008337  |
| 4             | 6             | 0.000004588            | -0.000002276 | 0.000002010  |
| 5             | 6             | 0.000004703            | 0.000003661  | -0.000000522 |
| 6             | 6             | 0.000001474            | 0.000000178  | 0.000003005  |
| 7             | 1             | 0.000003088            | -0.000000011 | 0.000000059  |

|    |   |              |              |              |
|----|---|--------------|--------------|--------------|
| 8  | 1 | 0.000001718  | -0.000003626 | -0.000002980 |
| 9  | 6 | -0.000008801 | 0.000005340  | -0.000021388 |
| 10 | 8 | -0.000002301 | 0.000006028  | 0.000009357  |
| 11 | 6 | 0.000009096  | -0.000003646 | -0.000021802 |
| 12 | 6 | -0.000001782 | 0.000002437  | 0.000009180  |
| 13 | 6 | -0.000005384 | 0.000001542  | 0.000016288  |
| 14 | 6 | 0.000000537  | -0.000000878 | -0.000000328 |
| 15 | 6 | -0.000004745 | 0.000000806  | -0.000002107 |
| 16 | 7 | -0.000004180 | -0.000001793 | 0.000007988  |
| 17 | 6 | -0.000002809 | -0.000002535 | -0.000000414 |
| 18 | 6 | 0.000011080  | -0.000000093 | 0.000005347  |
| 19 | 1 | -0.000001803 | -0.000000381 | -0.000000280 |
| 20 | 6 | -0.000001707 | 0.000000581  | 0.000000143  |
| 21 | 1 | -0.000000312 | 0.000001268  | -0.000001124 |
| 22 | 6 | 0.000027236  | -0.000011095 | 0.000060499  |
| 23 | 8 | -0.000011097 | 0.000007658  | -0.000019799 |
| 24 | 7 | -0.000000878 | -0.000004979 | 0.000005983  |
| 25 | 6 | 0.000004257  | -0.000000808 | 0.000001145  |
| 26 | 6 | -0.000001944 | -0.000002241 | -0.000009024 |
| 27 | 1 | -0.000001473 | -0.000003498 | -0.000002934 |
| 28 | 1 | 0.000001106  | 0.000001945  | -0.000000666 |
| 29 | 1 | 0.000001602  | -0.000002094 | 0.000002246  |
| 30 | 8 | -0.000013497 | 0.000009064  | 0.000003684  |
| 31 | 6 | 0.000031152  | -0.000011591 | -0.000029204 |
| 32 | 6 | -0.000008614 | 0.000007307  | -0.000001945 |
| 33 | 1 | -0.000003386 | -0.000001663 | -0.000003123 |
| 34 | 1 | -0.000000532 | 0.000002365  | 0.000004396  |
| 35 | 1 | 0.000001257  | 0.000004262  | -0.000001383 |
| 36 | 8 | -0.000006051 | -0.000001477 | 0.000013788  |
| 37 | 1 | 0.000000783  | -0.000000034 | -0.000002374 |
| 38 | 1 | -0.000000440 | 0.000000010  | -0.000000259 |
| 39 | 6 | -0.000009907 | -0.000020282 | -0.000017108 |
| 40 | 6 | -0.000020184 | 0.000023886  | 0.000001508  |
| 41 | 6 | 0.000017997  | -0.000000531 | 0.000008989  |
| 42 | 6 | 0.000031101  | -0.000005128 | 0.000019841  |
| 43 | 1 | 0.000001647  | -0.000003006 | -0.000001008 |
| 44 | 6 | -0.000003336 | 0.000017465  | 0.000010623  |
| 45 | 1 | -0.000002745 | -0.000000581 | -0.000001568 |
| 46 | 6 | -0.000033103 | -0.000013499 | -0.000028519 |
| 47 | 1 | -0.000004096 | 0.000001298  | -0.000000241 |
| 48 | 1 | 0.000001988  | -0.000005288 | -0.000003167 |
| 49 | 6 | 0.000011497  | 0.000021431  | -0.000019618 |
| 50 | 6 | -0.000021132 | 0.000000180  | 0.000009342  |
| 51 | 6 | 0.000019917  | -0.000024937 | 0.000002545  |
| 52 | 6 | 0.000005868  | -0.000018828 | 0.000012024  |
| 53 | 1 | 0.000001706  | 0.000001263  | 0.000000225  |
| 54 | 6 | -0.000031106 | 0.000003441  | 0.000019800  |
| 55 | 1 | -0.000002956 | 0.000003067  | -0.000001047 |
| 56 | 6 | 0.000034869  | 0.000017453  | -0.000029455 |
| 57 | 1 | -0.000002173 | 0.000004726  | -0.000003583 |
| 58 | 1 | 0.000004153  | -0.000001677 | -0.000000603 |
| 59 | 6 | -0.000015697 | 0.000018584  | 0.000037024  |
| 60 | 6 | -0.000019511 | -0.000011861 | -0.000017598 |
| 61 | 1 | 0.000005431  | -0.000008176 | -0.000006707 |
| 62 | 1 | 0.000006385  | 0.000000751  | -0.000012151 |
| 63 | 1 | 0.000003337  | -0.000001590 | -0.000003840 |
| 64 | 1 | 0.000001019  | 0.000000255  | 0.000010425  |
| 65 | 1 | 0.000001898  | 0.000009930  | 0.000001050  |
| 66 | 6 | 0.000014812  | -0.000019202 | 0.000036292  |
| 67 | 6 | 0.000019340  | 0.000012035  | -0.000017781 |
| 68 | 1 | -0.000005953 | 0.000008021  | -0.000006935 |
| 69 | 1 | -0.000005928 | -0.000000324 | -0.000011328 |

|    |   |              |              |              |
|----|---|--------------|--------------|--------------|
| 70 | 1 | -0.000003497 | 0.000001469  | -0.000003698 |
| 71 | 1 | -0.000001035 | -0.000000364 | 0.000010021  |
| 72 | 1 | -0.000001975 | -0.000010155 | 0.000001193  |

**Table 6:** Summary of the energetic and atomic parameters of the C<sub>2</sub>-symmetric conformation of 5,5'-bis-(4-methoxyphenyl)-N,N'-diacetyl indigo (55-DiPhOMe-DAIndigo)

|                                              |                |
|----------------------------------------------|----------------|
| E(RB3LYP)=                                   | -1872.55162178 |
| Sum of electronic and zero-point Energies=   | -1872.025987   |
| Sum of electronic and thermal Energies=      | -1871.989817   |
| Sum of electronic and thermal Enthalpies=    | -1871.988873   |
| Sum of electronic and thermal Free Energies= | -1872.096538   |
| Zero-point correction=                       | 0.525635       |
| (Hartree/Particle)                           |                |
| Thermal correction to Energy=                | 0.561805       |
| Thermal correction to Enthalpy=              | 0.562749       |
| Thermal correction to Gibbs Free Energy=     | 0.455083       |
| Entropy (cal/mol)=                           | 226.601        |

Number of imaginary frequencies = 0

Standard orientation:

| Center Number | Atomic Number | Forces (Hartrees/Bohr) |              |              |
|---------------|---------------|------------------------|--------------|--------------|
|               |               | X                      | Y            | Z            |
| 1             | 6             | 0.000003709            | 0.000005058  | -0.000000264 |
| 2             | 6             | -0.000002477           | -0.000001745 | -0.000002358 |
| 3             | 6             | -0.000001041           | 0.000003899  | 0.000000754  |
| 4             | 6             | 0.000000317            | 0.000000798  | -0.000000261 |
| 5             | 6             | -0.000003743           | -0.000002295 | 0.000003352  |
| 6             | 6             | -0.000001007           | 0.000004348  | -0.000002665 |
| 7             | 1             | 0.000000908            | 0.000000533  | 0.000000899  |
| 8             | 1             | 0.000000062            | 0.000002187  | 0.000000090  |
| 9             | 6             | 0.000011293            | 0.000001409  | 0.000003719  |
| 10            | 8             | -0.000001446           | -0.000006371 | -0.000001364 |
| 11            | 6             | 0.000004889            | 0.000007375  | 0.000002312  |
| 12            | 6             | -0.000004671           | -0.000005132 | -0.000002233 |
| 13            | 6             | -0.000006391           | 0.000004173  | -0.000005056 |
| 14            | 6             | 0.000004359            | -0.000001789 | -0.000000178 |
| 15            | 6             | 0.000002833            | 0.000001314  | -0.000000320 |
| 16            | 7             | -0.000004171           | 0.000001995  | 0.000001813  |
| 17            | 6             | 0.000001347            | 0.000001006  | 0.000001308  |
| 18            | 6             | 0.000000097            | -0.000003829 | -0.000000722 |
| 19            | 1             | -0.000000954           | -0.000000842 | 0.000000554  |
| 20            | 6             | 0.000000183            | -0.000000882 | 0.000000773  |
| 21            | 1             | 0.000001255            | -0.000002552 | 0.000000337  |
| 22            | 6             | -0.000006151           | -0.000001182 | -0.000003073 |
| 23            | 8             | 0.000004364            | -0.000000118 | -0.000002759 |
| 24            | 7             | -0.000001634           | -0.000010177 | 0.000007235  |
| 25            | 6             | -0.000007676           | 0.000018713  | -0.000009529 |
| 26            | 6             | 0.000003025            | -0.000003032 | 0.000003116  |
| 27            | 1             | 0.000000179            | -0.000000097 | -0.000000328 |
| 28            | 1             | -0.000000931           | -0.000000418 | 0.000000255  |
| 29            | 1             | -0.000001797           | 0.000000034  | 0.000000308  |
| 30            | 8             | 0.000002989            | -0.000009176 | 0.000001358  |
| 31            | 6             | -0.000002976           | -0.000008356 | 0.000001649  |
| 32            | 6             | 0.000002248            | 0.000002272  | 0.000001923  |
| 33            | 1             | 0.000000024            | -0.000000566 | 0.000001073  |
| 34            | 1             | 0.000000638            | -0.000000650 | -0.000000366 |
| 35            | 1             | -0.000000406           | 0.000000008  | -0.000000325 |
| 36            | 8             | 0.000001292            | 0.000004494  | -0.000002149 |
| 37            | 1             | 0.000000083            | 0.000001117  | 0.000000193  |

|    |   |              |              |               |
|----|---|--------------|--------------|---------------|
| 38 | 1 | 0.000000171  | -0.000001457 | 0.000000346   |
| 39 | 6 | -0.000002015 | -0.000005615 | -0.000002939  |
| 40 | 6 | -0.000000327 | 0.000004146  | 0.000001545   |
| 41 | 6 | 0.000006282  | -0.000000613 | 0.000001943   |
| 42 | 6 | 0.000006280  | -0.000003094 | 0.000002261   |
| 43 | 1 | 0.000000059  | -0.000002016 | 0.000000246   |
| 44 | 6 | -0.000005338 | 0.000006509  | 0.000000087   |
| 45 | 1 | -0.000000085 | -0.000002705 | 0.000000296   |
| 46 | 6 | 0.000001544  | -0.000011412 | 0.000003642   |
| 47 | 1 | -0.000001787 | -0.000002219 | -0.000001212  |
| 48 | 1 | 0.000001952  | -0.000004283 | 0.000000573   |
| 49 | 6 | 0.000003557  | 0.000001803  | -0.000001483  |
| 50 | 6 | -0.000005183 | 0.000002269  | -0.000000291  |
| 51 | 6 | 0.000000320  | -0.000001768 | 0.0000003347  |
| 52 | 6 | 0.000004448  | -0.000007794 | 0.000000715   |
| 53 | 1 | 0.000000327  | 0.000002493  | 0.000000109   |
| 54 | 6 | -0.000001474 | 0.000005594  | 0.000001063   |
| 55 | 1 | -0.000000867 | 0.000002125  | 0.000000444   |
| 56 | 6 | -0.000002932 | 0.000005719  | -0.000000297  |
| 57 | 1 | -0.000001038 | 0.000005436  | 0.000000688   |
| 58 | 1 | 0.000001452  | 0.000001876  | -0.000001108  |
| 59 | 6 | -0.000001658 | 0.000007900  | -0.000011030  |
| 60 | 1 | 0.000002746  | 0.000001815  | 0.000000453   |
| 61 | 1 | 0.000001334  | 0.000002524  | 0.000002105   |
| 62 | 1 | 0.000000814  | 0.000000074  | 0.0000003640  |
| 63 | 6 | 0.000000023  | -0.000006008 | -0.0000008066 |
| 64 | 1 | -0.000002446 | -0.000001702 | -0.000000646  |
| 65 | 1 | -0.000000945 | -0.000002708 | 0.000001906   |
| 66 | 1 | -0.000000971 | 0.000000087  | 0.000002167   |
| 67 | 8 | 0.000000604  | 0.000000043  | 0.000001950   |
| 68 | 8 | -0.000003464 | 0.000001458  | -0.000001524  |

**Table 7:** Summary of the energetic and atomic parameters of the C<sub>2</sub>-symmetric conformation of 6,6'-bis-(4-ethylphenyl)-*N,N'*-diacetyl indigo (66-DiPhEt-DAIndigo).

|                                              |                |
|----------------------------------------------|----------------|
| E(RB3LYP)=                                   | -1800.74452635 |
| Sum of electronic and zero-point Energies=   | -1800.171571   |
| Sum of electronic and thermal Energies=      | -1800.134472   |
| Sum of electronic and thermal Enthalpies=    | -1800.133527   |
| Sum of electronic and thermal Free Energies= | -1800.244653   |
| Zero-point correction=                       | 0.572955       |
| (Hartree/Particle)                           |                |
| Thermal correction to Energy=                | 0.610055       |
| Thermal correction to Enthalpy=              | 0.610999       |
| Thermal correction to Gibbs Free Energy=     | 0.499873       |
| Entropy (cal/mol)=                           | 233.885        |

Number of imaginary frequencies = 0

Standard orientation:

| Center Number | Atomic Number | Forces (Hartrees/Bohr) |              |              |
|---------------|---------------|------------------------|--------------|--------------|
|               |               | X                      | Y            | Z            |
| 1             | 6             | 0.000009876            | -0.000004739 | 0.000001153  |
| 2             | 6             | -0.000004858           | 0.000000409  | 0.000002857  |
| 3             | 6             | 0.000005059            | 0.000000733  | -0.000000527 |
| 4             | 6             | -0.000011236           | 0.000002303  | -0.000005564 |
| 5             | 6             | 0.000003006            | -0.000003984 | 0.000003588  |
| 6             | 6             | -0.000002327           | 0.000002905  | -0.000001677 |
| 7             | 1             | -0.000000194           | -0.000000414 | -0.000001598 |

|    |   |              |              |              |
|----|---|--------------|--------------|--------------|
| 8  | 1 | 0.000001864  | 0.000001233  | 0.000000050  |
| 9  | 6 | 0.000000594  | 0.000001200  | 0.000001168  |
| 10 | 8 | -0.000004876 | 0.000003789  | -0.000003219 |
| 11 | 6 | 0.000010468  | -0.000005295 | 0.000006129  |
| 12 | 6 | -0.000012275 | 0.000004026  | -0.000003936 |
| 13 | 6 | 0.000000353  | -0.000000817 | -0.000000092 |
| 14 | 6 | 0.000003200  | -0.000002570 | 0.000001064  |
| 15 | 6 | 0.000005143  | -0.000000885 | 0.000001142  |
| 16 | 7 | -0.000000862 | 0.000008078  | -0.000002860 |
| 17 | 6 | -0.000001567 | 0.000004682  | 0.000003461  |
| 18 | 6 | -0.000005176 | -0.000000230 | -0.000000538 |
| 19 | 1 | 0.000000390  | 0.000000488  | -0.000001537 |
| 20 | 6 | 0.000011355  | -0.000002204 | -0.000004498 |
| 21 | 1 | -0.000002173 | -0.000000487 | -0.000000974 |
| 22 | 6 | -0.000005044 | 0.000007572  | -0.000009513 |
| 23 | 8 | 0.000003898  | -0.000005120 | 0.000007120  |
| 24 | 7 | 0.000002450  | -0.000007327 | -0.000005286 |
| 25 | 6 | -0.000019158 | -0.000004806 | 0.000019557  |
| 26 | 6 | 0.000004415  | 0.000005481  | -0.000000786 |
| 27 | 1 | -0.000000911 | -0.000000387 | -0.000001051 |
| 28 | 1 | 0.000002054  | -0.000000045 | 0.000002250  |
| 29 | 1 | -0.000000639 | 0.000000610  | -0.000002311 |
| 30 | 8 | 0.000006823  | 0.000000181  | -0.000009062 |
| 31 | 6 | 0.000003689  | -0.000013162 | -0.000003325 |
| 32 | 6 | 0.000000086  | 0.000002095  | -0.000000109 |
| 33 | 1 | -0.000001107 | -0.000000486 | -0.000000596 |
| 34 | 1 | -0.000000418 | -0.000001259 | -0.000001049 |
| 35 | 1 | 0.000000173  | 0.000002456  | -0.000000857 |
| 36 | 8 | -0.000001991 | 0.000005611  | 0.000002614  |
| 37 | 1 | -0.000002001 | 0.000002820  | 0.000001406  |
| 38 | 1 | 0.000002160  | -0.000002851 | 0.000001414  |
| 39 | 6 | -0.000008333 | -0.000004317 | 0.000014964  |
| 40 | 6 | -0.000013027 | 0.000007127  | -0.000005408 |
| 41 | 6 | 0.000014489  | 0.000002257  | -0.000007580 |
| 42 | 6 | 0.000017687  | -0.000000502 | -0.000010958 |
| 43 | 1 | 0.000002706  | 0.000000317  | 0.000001039  |
| 44 | 6 | -0.000011409 | 0.000007336  | -0.000005974 |
| 45 | 1 | -0.000001325 | -0.000000341 | 0.000000508  |
| 46 | 6 | -0.000011539 | -0.000003774 | 0.000015447  |
| 47 | 1 | -0.000002565 | 0.000001778  | 0.000001701  |
| 48 | 1 | 0.000002490  | 0.000001016  | 0.000001790  |
| 49 | 6 | 0.000007926  | 0.000004860  | 0.000016544  |
| 50 | 6 | -0.000016142 | -0.000002278 | -0.000008761 |
| 51 | 6 | 0.000014447  | -0.000007863 | -0.000005654 |
| 52 | 6 | 0.000012681  | -0.000008627 | -0.000006298 |
| 53 | 1 | 0.000001354  | 0.000000587  | 0.000000467  |
| 54 | 6 | -0.000018662 | 0.000000971  | -0.000012328 |
| 55 | 1 | -0.000002586 | -0.000000236 | 0.000001143  |
| 56 | 6 | 0.000011914  | 0.000005314  | 0.000017986  |
| 57 | 1 | -0.000002698 | -0.000000990 | 0.000001745  |
| 58 | 1 | 0.000002493  | -0.000001969 | 0.000001708  |
| 59 | 6 | -0.000015819 | 0.000005213  | -0.000009015 |
| 60 | 6 | 0.000000971  | -0.000003233 | 0.000000825  |
| 61 | 1 | 0.000002735  | -0.000001271 | 0.000003839  |
| 62 | 1 | 0.000005127  | -0.000006034 | 0.000001235  |
| 63 | 1 | 0.000001160  | -0.000004761 | 0.000000227  |
| 64 | 1 | 0.000000322  | 0.000001249  | 0.000002165  |
| 65 | 1 | -0.000001964 | 0.000000509  | -0.000002685 |
| 66 | 6 | 0.000015585  | -0.000005328 | -0.000008753 |
| 67 | 6 | -0.000001050 | 0.000003134  | 0.000001078  |
| 68 | 1 | -0.000002711 | 0.000001610  | 0.000004122  |
| 69 | 1 | -0.000005053 | 0.000005667  | 0.000001055  |



|    |   |              |              |              |
|----|---|--------------|--------------|--------------|
| 70 | 1 | -0.000001140 | 0.000004679  | 0.000000394  |
| 71 | 1 | -0.000000418 | -0.000001280 | 0.000002104  |
| 72 | 1 | 0.000002108  | -0.000000421 | -0.000002678 |

**Table 8:** Summary of the energetic and atomic parameters of the C<sub>2</sub>-symmetric conformation of 6,6'-bis-(4-methoxyphenyl)-*N,N'*-diacetyl indigo (66-DiPhOMe-DAIndigo).

|                                              |                |
|----------------------------------------------|----------------|
| E(RB3LYP)=                                   | -1872.55412215 |
| Sum of electronic and zero-point Energies=   | -1872.028167   |
| Sum of electronic and thermal Energies=      | -1871.992080   |
| Sum of electronic and thermal Enthalpies=    | -1871.991136   |
| Sum of electronic and thermal Free Energies= | -1872.098429   |
| Zero-point correction=                       | 0.525956       |
| (Hartree/Particle)                           |                |
| Thermal correction to Energy=                | 0.562042       |
| Thermal correction to Enthalpy=              | 0.562986       |
| Thermal correction to Gibbs Free Energy=     | 0.455693       |
| Entropy (cal/mol)=                           | 225.817        |

Number of imaginary frequencies = 0

Standard orientation:

| Center<br>Number | Atomic<br>Number | Forces (Hartrees/Bohr) |              |              |
|------------------|------------------|------------------------|--------------|--------------|
|                  |                  | X                      | Y            | Z            |
| 1                | 6                | -0.000002506           | 0.000002559  | -0.000004834 |
| 2                | 6                | 0.000002009            | 0.000001894  | -0.000003401 |
| 3                | 6                | -0.000001561           | -0.000007924 | 0.000000835  |
| 4                | 6                | 0.000011708            | 0.000004698  | -0.000000762 |
| 5                | 6                | 0.000000382            | -0.000002136 | -0.000004165 |
| 6                | 6                | -0.000000768           | -0.000001461 | 0.000004110  |
| 7                | 1                | 0.000000735            | -0.000000581 | 0.000000427  |
| 8                | 1                | -0.000003470           | -0.000002111 | -0.000000935 |
| 9                | 6                | -0.000004276           | -0.000009318 | 0.000000334  |
| 10               | 8                | 0.000003545            | -0.000001977 | 0.000011026  |
| 11               | 6                | -0.000010921           | 0.000000943  | -0.000017608 |
| 12               | 6                | 0.000003240            | -0.000001119 | 0.000002337  |
| 13               | 6                | 0.000005398            | 0.000010437  | -0.000002524 |
| 14               | 6                | -0.000005056           | 0.000001000  | -0.000000774 |
| 15               | 6                | -0.000000529           | 0.000000519  | 0.000004055  |
| 16               | 7                | -0.000000019           | 0.000000451  | 0.000000841  |
| 17               | 6                | -0.000001258           | 0.000004915  | 0.000001178  |
| 18               | 6                | 0.000002799            | 0.000001890  | 0.000000277  |
| 19               | 1                | -0.000000693           | 0.000000432  | -0.000001295 |
| 20               | 6                | -0.000001483           | -0.000003142 | -0.000005469 |
| 21               | 1                | 0.000000778            | -0.000000754 | 0.000002421  |
| 22               | 6                | -0.000004307           | -0.000004717 | 0.000019626  |
| 23               | 8                | 0.000002943            | 0.000004868  | -0.000011030 |
| 24               | 7                | 0.000001308            | 0.000008453  | 0.000000575  |
| 25               | 6                | 0.000001803            | -0.000010058 | -0.000003770 |
| 26               | 6                | -0.000001116           | -0.000002043 | -0.000007694 |
| 27               | 1                | 0.000002431            | -0.000000280 | 0.000004627  |
| 28               | 1                | -0.000002213           | 0.000001476  | -0.000001655 |
| 29               | 1                | 0.000000096            | -0.000002194 | 0.000003050  |
| 30               | 8                | 0.000000335            | 0.000005369  | 0.000002536  |
| 31               | 6                | 0.000008730            | -0.000004039 | 0.000009200  |
| 32               | 6                | -0.000005795           | 0.000002652  | 0.000002137  |
| 33               | 1                | 0.000000886            | -0.000001321 | 0.000000727  |
| 34               | 1                | 0.000000040            | 0.000000077  | -0.000000090 |
| 35               | 1                | 0.000001784            | -0.000001863 | -0.000004443 |
| 36               | 8                | -0.000001908           | 0.000001396  | -0.000006449 |
| 37               | 1                | -0.000002835           | 0.000001229  | 0.000003305  |

|    |   |              |              |              |
|----|---|--------------|--------------|--------------|
| 38 | 1 | -0.000000314 | 0.000000850  | -0.000000762 |
| 39 | 6 | 0.000001783  | -0.000006882 | 0.000015265  |
| 40 | 6 | -0.000004977 | 0.000003979  | -0.000003912 |
| 41 | 6 | 0.000011946  | 0.000002886  | -0.000006145 |
| 42 | 6 | 0.000001441  | -0.000001266 | -0.000001111 |
| 43 | 1 | -0.000000468 | 0.000000020  | -0.000000080 |
| 44 | 6 | -0.000006127 | 0.000005375  | -0.000002247 |
| 45 | 1 | -0.000002263 | -0.000000268 | 0.000000294  |
| 46 | 6 | 0.000005328  | -0.000001002 | 0.000006167  |
| 47 | 1 | -0.000000308 | 0.000001634  | -0.000000058 |
| 48 | 1 | 0.000001662  | -0.000001236 | 0.000002902  |
| 49 | 6 | -0.000011572 | 0.000005065  | 0.000011604  |
| 50 | 6 | -0.000005416 | -0.000001325 | -0.000011950 |
| 51 | 6 | 0.000009472  | -0.000006552 | -0.000004962 |
| 52 | 6 | 0.000014231  | -0.000007111 | -0.000003666 |
| 53 | 1 | 0.000002798  | 0.000000270  | 0.000002195  |
| 54 | 6 | -0.000008686 | 0.000000891  | -0.000008262 |
| 55 | 1 | 0.000001372  | -0.000001783 | 0.000000838  |
| 56 | 6 | -0.000001787 | 0.000000959  | 0.000017857  |
| 57 | 1 | -0.000001978 | 0.000000428  | 0.000002096  |
| 58 | 1 | 0.000001047  | -0.000002940 | 0.000001091  |
| 59 | 6 | -0.000004554 | -0.000001319 | 0.000002913  |
| 60 | 1 | -0.000001338 | -0.000000170 | -0.000001967 |
| 61 | 1 | -0.000000992 | 0.000001165  | -0.000002470 |
| 62 | 1 | 0.000002583  | -0.000000932 | -0.000001203 |
| 63 | 6 | 0.000002816  | 0.000007964  | 0.000009737  |
| 64 | 1 | 0.000002465  | -0.000000013 | -0.000001788 |
| 65 | 1 | -0.000001852 | -0.000000168 | -0.000004592 |
| 66 | 1 | -0.000002511 | -0.000000253 | -0.000000219 |
| 67 | 8 | 0.000000488  | -0.000001494 | -0.000009423 |
| 68 | 8 | -0.000004524 | 0.000005004  | -0.000004869 |

---

## Calculation of the p-Orbital Alignment Vectors:

The p-orbital axis vector (POAV) analysis as introduced by *Haddon*<sup>[5]</sup> is a powerful tool for the description of pyramidalized atoms with hybridization between  $sp^2$  and  $sp^3$  providing the angle of pyramidalization and the degree of hybridization in terms of  $sp^n$ .

The POAV1 is defined to originate in the central atom and to have equal angles  $\geq 90^\circ$  to the vectors of all three surrounding atoms. For a perfect  $sp^2$  hybridized atom this angle is  $90^\circ$ , whereas it is the tetrahedral angle of  $109.47^\circ$  for a perfect  $sp^3$  hybridized atom.

However the POAV1 theory assumes an equal  $\sigma$ -bond hybridisation in  $C_{3v}$  symmetry and may lead to significant deviations of the actual hybridization, when the bond angles  $\theta_{ij}$  to the surrounding atoms substantially differ.<sup>[5a]</sup> This case is given for the here examined indigoid structures and a more accurate description is obtained from the POAV2 theory, which treats the  $\sigma$ -bond hybridisations individually.<sup>[5a]</sup>

In order to be able to measure the dihedral angle between two POAVs within a structure dummy atoms were placed along these vectors in an arbitrary distance of 1 Å. The procedure which gave the x, y, z coordinates of this dummy atom, according to POAV1 and POAV2 theory, was implemented into an Excel worksheet and is outlined below exemplary for the C2 carbon of the calculated structure of *N,N'*-diacetyl indigo with  $C_2$  symmetry. The x, y and z coordinates of the central atom and the three surrounding atoms were gathered (see table DAIndigo\_C2\_1\_freq.log, atoms 9 (C2'), 11 (C3), 16 (N) and 13 (C2)):

Example:

| atom        | x        | y       | z        |
|-------------|----------|---------|----------|
| 1 (C2')     | 0.14363  | -0.6666 | 0.31116  |
| 2 (C3)      | -1.45208 | 1.25011 | -0.16368 |
| 3 (N)       | 0.80912  | 1.70209 | 0.33885  |
| center (C2) | -0.14363 | 0.6666  | 0.31116  |

By subtracting the  $x_c$ ,  $y_c$ , and  $z_c$  values of the center from the  $x_i$ ,  $y_i$  and  $z_i$  values of the atoms 1, 2 and 3 the center was shifted to the origin and the magnitude  $\|\vec{V}_i\|$  of the resulting vectors was calculated according to:

$$\|\vec{V}_i\| = \sqrt{x_i^2 + y_i^2 + z_i^2} \quad (4)$$

Example:

| vector (from center) | x        | y       | z        | magnitude |
|----------------------|----------|---------|----------|-----------|
| V1                   | 0.28726  | -1.3332 | 0        | 1.3637964 |
| V2                   | -1.30845 | 0.58351 | -0.47484 | 1.5093039 |
| V3                   | 0.95275  | 1.03549 | 0.02769  | 1.4073872 |

The vectors were normalized by dividing the  $x_i$ ,  $y_i$  and  $z_i$  values by the corresponding magnitudes  $\|\vec{V}_i\|$  and were written in the following matrix representation:

$$\vec{V}_i = \begin{bmatrix} x_i \\ y_i \\ z_i \end{bmatrix} \quad (5)$$

Example:

| normalized vectors | V1        | V2        | V3        |
|--------------------|-----------|-----------|-----------|
| x                  | 0.2106326 | -0.977565 | 0         |
| y                  | -0.866923 | 0.386609  | -0.314609 |
| z                  | 0.6769636 | 0.735753  | 0.0196748 |

The POAV1 is obtained from the following relation:<sup>[5c]</sup>

$$\vec{V}_\pi = \frac{(\vec{V}_2 - \vec{V}_1) \times (\vec{V}_3 - \vec{V}_1)}{\|(\vec{V}_2 - \vec{V}_1) \times (\vec{V}_3 - \vec{V}_1)\|} = \frac{\vec{a} \times \vec{b}}{\|\vec{a} \times \vec{b}\|} \quad (6)$$

First  $\vec{V}_1$  was subtracted from  $\vec{V}_2$  or  $\vec{V}_3$ , giving  $\vec{a}$  or  $\vec{b}$ , respectively. Then the cross product between  $\vec{a}$  and  $\vec{b}$  was formed according to:

$$\vec{a} \times \vec{b} = \begin{bmatrix} a_x \\ a_y \\ a_z \end{bmatrix} \times \begin{bmatrix} b_x \\ b_y \\ b_z \end{bmatrix} = \begin{bmatrix} a_y b_z - a_z b_y \\ a_z b_x - a_x b_z \\ a_x b_y - a_y b_x \end{bmatrix} \quad (7)$$

The magnitude of the resulting vector was calculated by:

$$\|\vec{a} \times \vec{b}\| = \sqrt{(a_y b_z - a_z b_y)^2 + (a_z b_x - a_x b_z)^2 + (a_x b_y - a_y b_x)^2} \quad (8)$$

Normalizing by dividing the  $x_i$ ,  $y_i$  and  $z_i$  values of the cross product  $\vec{a} \times \vec{b}$  by its magnitude  $\|\vec{a} \times \vec{b}\|$  directly gave the POAV1.

Example:

|           | a (V2 - V1) | b (V3 - V1) | a × b    | $\vec{V}_\pi$ |
|-----------|-------------|-------------|----------|---------------|
| x         | -1.07756    | 0.466331    | 0.565865 | 0.22198       |
| y         | 1.36417     | 1.7133187   | -0.12551 | -0.0492       |
| z         | -0.31461    | 0.0196748   | -2.48235 | -0.9738       |
| magnitude | 1.76666     | 1.775757    | 2.549123 | 1             |

The angle  $\theta_{\sigma\pi}$  between the POAV1 and all three vectors of the surrounding atoms was calculated and checked to be equal according to:<sup>[5c]</sup>

$$\theta_{\sigma_i\pi} = \cos^{-1} \left( \frac{\begin{bmatrix} x_i \\ y_i \\ z_i \end{bmatrix} \cdot \begin{bmatrix} x_\pi \\ y_\pi \\ z_\pi \end{bmatrix}}{\|\vec{v}_i\| \cdot \|\vec{v}_\pi\|} \right) \quad (9)$$

Example:

| angle check  | $\cos \theta_{\sigma\pi}$ | rad      | degrees | Neg. Scalar |
|--------------|---------------------------|----------|---------|-------------|
| V1-p-Orbital | 0.0948894                 | 1.475764 | 84.555  | 95.445      |
| V2-p-Orbital | 0.0948894                 | 1.475764 | 84.555  |             |
| V3-p-Orbital | 0.0948894                 | 1.475764 | 84.555  |             |

When the angle turned out to be  $< 90^\circ$  (as in the example) the scalar product was multiplied with -1.

The pyramidalisation  $\theta$  was determined as  $(\theta_{\sigma\pi} - 90)^\circ$

The degree of hybridization (POAV1) of the  $\pi$ -orbital ( $s^m p$ ) was calculated with:<sup>[5c]</sup>

$$m = 2 \cos^2(\theta_{\sigma\pi}) / (1 - 3\cos^2(\theta_{\sigma\pi})) \quad (10)$$

The average degree of hybridization of the  $\sigma$ -orbital ( $sp^n$ ) was calculated with:<sup>[5c]</sup>

$$\bar{n} = 3m + 2 \quad (11)$$

The x, y and z coordinates for the POAV1-dummy atom were obtained after shifting the vector or its negative (in the case of an initial  $\theta_{\sigma\pi} < 90^\circ$ , as in the example) back to the central atom by adding the  $x_c$ ,  $y_c$ , and  $z_c$  values of the center.

Example:

| POAV1-dummy | x        | y        | z        |
|-------------|----------|----------|----------|
| vector      | -0.22198 | 0.049237 | 0.973806 |
| shifted     | -0.3656  | 0.7158   | 1.2850   |

For the parameters of the POAV2 theory first the cosine of the angle  $\theta_{ij}$  between all combinations of the normalized vectors V<sub>1</sub>, V<sub>2</sub> and V<sub>3</sub> were calculated according to:

$$\cos \theta_{ij} = \begin{bmatrix} x_i \\ y_i \\ z_i \end{bmatrix} \cdot \begin{bmatrix} x_j \\ y_j \\ z_j \end{bmatrix} \quad (12)$$

Example:

| angle  | V1-V2     | V2-V3     | V3-V1     |
|--------|-----------|-----------|-----------|
| cos    | -0.560537 | -0.308616 | -0.576656 |
| rad    | 2.165831  | 1.884534  | 2.1854265 |
| degree | 124.09297 | 107.9759  | 125.21571 |

The relation of the POAV2 to the vectors of the neighbouring atoms can be expressed in a set of linear homogenous equations:<sup>[5a]</sup>

$$\begin{aligned}
 (x_3 \cos \theta_{12} - x_2 \cos \theta_{31})x_\pi + (y_3 \cos \theta_{12} - y_2 \cos \theta_{31})y_\pi + (z_3 \cos \theta_{12} - z_2 \cos \theta_{31})z_\pi &= 0 \\
 (x_1 \cos \theta_{23} - x_3 \cos \theta_{12})x_\pi + (y_1 \cos \theta_{23} - y_3 \cos \theta_{12})y_\pi + (z_1 \cos \theta_{23} - z_3 \cos \theta_{12})z_\pi &= 0 \\
 (x_2 \cos \theta_{13} - x_1 \cos \theta_{23})x_\pi + (y_2 \cos \theta_{13} - y_1 \cos \theta_{23})y_\pi + (z_2 \cos \theta_{13} - z_1 \cos \theta_{23})z_\pi &= 0
 \end{aligned} \tag{13}$$

The constants in each equation were summarised in the form:

$$a_i x_\pi + b_i y_\pi + c_i z_\pi = 0 \tag{14}$$

Example:

|       | a         | b         | c         |
|-------|-----------|-----------|-----------|
| Eq. 1 | -0.87938  | -0.189477 | -0.19245  |
| Eq. 2 | 0.3144588 | 0.71411   | 0.0110284 |
| Eq. 3 | 0.5649213 | -0.524633 | 0.1814211 |

One equation was solved for  $x_\pi$  in dependence of  $y_\pi$  and  $z_\pi$  and the result was substituted in another equation which was then solved for  $y_\pi$  in dependence of  $z_\pi$ , yielding the following relations:

$$x_\pi = -\frac{(b_i y_\pi + c_i z_\pi)}{a_i} \tag{15} \quad \text{and} \quad y_\pi = \frac{(a_i c_j - a_j c_i)}{(a_j b_i - a_i b_j)} z_\pi \tag{16}$$

By setting  $z_\pi$  to a constant value  $y_\pi$  and  $x_\pi$  may be obtained. In order to assure that the POAV2 points in the same direction as the POAV1 the z-coordinate of the POAV1 vector was used as the constant value for  $z_\pi$ .

The result was checked for consistency by solving for all combinations of the initial equations and the resultant vector was normalized.

Example:

| Eq. 1&2                                        |           | Z=Z(POAV1) | normed   |
|------------------------------------------------|-----------|------------|----------|
| $x = -(b_1 y + c_1 z)/a_1$                     | X=        | 0.23187441 | 0.23076  |
| $y = z(a_1 c_2 - a_2 c_1)/(a_2 b_1 - a_1 b_2)$ | Y=        | -0.087067  | -0.08665 |
|                                                | Z=        | -0.9738064 | -0.96914 |
|                                                | magnitude | 1.00481104 | 1        |

| Eq. 1&3                                        |           | Z=Z(POAV1) | normed   |
|------------------------------------------------|-----------|------------|----------|
| $x = -(b_1 y + c_1 z)/a_1$                     | X=        | 0.23187441 | 0.23076  |
| $y = z(a_1 c_3 - a_3 c_1)/(a_3 b_1 - a_1 b_3)$ | Y=        | -0.087067  | -0.08665 |
|                                                | Z=        | -0.9738064 | -0.96914 |
|                                                | magnitude | 1.00481104 | 1        |

|                                |           |            |          |
|--------------------------------|-----------|------------|----------|
| Eq. 2&3                        |           | Z=Z(POAV1) | normed   |
| $x = -(b2y+c2z)/a2$            | X=        | 0.23187441 | 0.23076  |
| $y = z(a2c3-a3c2)/(a3b2-a2b3)$ | Y=        | -0.087067  | -0.08665 |
|                                | Z=        | -0.9738064 | -0.96914 |
|                                | magnitude | 1.00481104 | 1        |

The x, y and z coordinates for the POAV2-dummy atom were obtained after shifting the vector or its negative (in the case of an initial  $\theta_{\sigma} < 90^\circ$ , as in the example) back to the central atom by adding the  $x_c$ ,  $y_c$ , and  $z_c$  values of the center.

Example:

| POAV2-dummy | x        | y       | z       |
|-------------|----------|---------|---------|
| vector      | -0.23076 | 0.08665 | 0.96914 |
| shifted     | -0.37439 | 0.75325 | 1.28030 |

The POAV2 theory yields the individual  $\sigma$ -bond hybridizations ( $sp^n$ ) through the following relations:<sup>[5a]</sup>

$$n_1 = \lambda_1^2 = \frac{-(\cos\theta_{23})}{\cos\theta_{12}\cos\theta_{13}}, \quad n_2 = \lambda_2^2 = \frac{-(\cos\theta_{13})}{\cos\theta_{12}\cos\theta_{23}}, \quad n_3 = \lambda_3^2 = \frac{-(\cos\theta_{12})}{\cos\theta_{13}\cos\theta_{23}} \quad (17)$$

With  $S(\lambda_\sigma) = \sum_{i=1}^3 \frac{1}{1+\lambda_i^2}$  and the normalization requirement of the s content in the four hybrids  $S(\lambda_\sigma) + \frac{1}{1+\lambda_\pi^2} = 1$  the p-orbital hybridization  $s^m p$  may be obtained according to:

$$m = \frac{1}{\lambda_\pi^2} = S(\lambda_\sigma)^{-1} - 1 \quad (18)$$

Example:

|               |           |          |           |           |           |
|---------------|-----------|----------|-----------|-----------|-----------|
|               | 1         | 2        | 3         | Sum       |           |
| n             | 0.9547667 | 3.333446 | 3.149695  |           |           |
| lambda        | 0.9771216 | 1.825773 | 1.774738  |           |           |
| 1/(1+n)       | 0.51157   | 0.230763 | 0.2409816 | 0.9833148 |           |
| (lambda pi)^2 |           |          |           |           | 58.933268 |
| m             |           |          |           |           | 0.0169683 |

## Complete list of determined angles and distances:

The POAV1 and POAV2 analysis was applied to the C2, C3, C8 and the N atom and their symmetric counterparts for the computed  $C_i$  and  $C_2$  symmetric unsubstituted  $N,N'$ -diacetylindigo and the 5,5'- and 6,6'-bis-substituted  $N,N'$ -diacetylindigo compounds with 4-ethylphenyl (PhEt) and 4-methoxyphenyl (PhOMe) substituents as well as the X-ray crystallographic determined molecular structures of  $N,N'$ -diacetylindigo (published by *Grimme*)<sup>[6]</sup> and the 5,5'- and 6,6'-bis-substituted  $N,N'$ -diacetylindigo compounds **12** and **23**. The definitions of the center atom and their surrounding neighbor atoms 1, 2 and 3 are given in **Table 9**. The primary data of the POAV1 and POAV2 analysis is complied in **Table 10** and Table 11. Finally, Table 12 summerises all measured distances and angles which were obtained after introduction of the POAV1 and POAV2 dummy atoms in the computed or X-ray crystallographic determined molecular structures.

**Table 9:** Definition of the center atoms and the three surrounding atoms on which the POAV analysis was applied.

| Center | C2  | C2' | N   | N'   | C3   | C3'   | C8   | C8'   |
|--------|-----|-----|-----|------|------|-------|------|-------|
| Atom 1 | C2' | C2  | C2  | C2'  | C2   | C2'   | C9   | C9'   |
| Atom 2 | C3  | C3' | C7a | C7a' | O(3) | O(3)' | N    | N'    |
| Atom 3 | N   | N'  | C8  | C8'  | C3a  | C3a'  | O(8) | O(8)' |

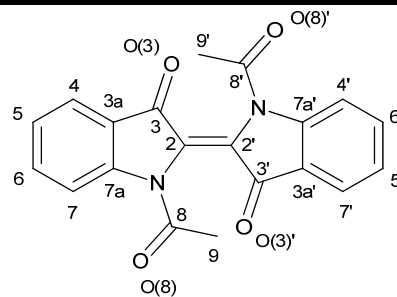



**Table 10:** Primary data of the POAV1 and POAV2 analysis for the computed  $C_i$  and  $C_2$  symmetric unsubstituted  $N,N'$ -diacetylidigo and the 5,5'- and 6,6'-bis-substituted  $N,N'$ -diacetylidigo compounds with 4-ethylphenyl (PhEt) and 4-methoxyphenyl (PhOMe) substituents.

| Structure                        | POAV1  |                   |        |        |                     |       |           |          |          |                |          |      | POAV2 |                       |                       |                       |       |       |         |          |          |          |          |   |
|----------------------------------|--------|-------------------|--------|--------|---------------------|-------|-----------|----------|----------|----------------|----------|------|-------|-----------------------|-----------------------|-----------------------|-------|-------|---------|----------|----------|----------|----------|---|
|                                  | Center | neighboring atoms |        |        | dummy atom position |       |           |          |          | angles, degree |          |      |       | dummy atom position   |                       |                       |       |       |         |          |          |          |          |   |
|                                  |        | angles, degree    |        |        | $\theta_{ox}$       | Pyr.  | $\bar{n}$ | $m$      | x        | y              | z        | r    | POAV1 | $\theta_{\sigma1\pi}$ | $\theta_{\sigma2\pi}$ | $\theta_{\sigma3\pi}$ | $n_1$ | $n_2$ | $n_3$   | $m$      | x        | y        | z        | r |
| $N,N'$ -DiAc Indigo $C_1$ -sym.  | C2     | 126.23            | 107.05 | 126.44 | 91.71               | 1.71  | 2.005     | 0.00178  | -0.17295 | -1.14773       | -0.39659 | 1    | 0.79  | 92.50                 | 91.23                 | 91.24                 | 0.835 | 3.427 | 3.393   | 0.00159  | -0.17940 | -1.15079 | -0.40843 | 1 |
|                                  | C2'    | 126.23            | 107.05 | 126.44 | 91.71               | 1.71  | 2.005     | 0.00178  | 0.17295  | 1.14773        | 0.39659  | 1    | 0.79  | 92.50                 | 91.23                 | 91.24                 | 0.835 | 3.427 | 3.393   | 0.00159  | 0.17940  | 1.15079  | 0.40843  | 1 |
|                                  | <C2>   | 126.23            | 107.05 | 126.44 | 91.71               | 1.71  | 2.005     | 0.00178  |          |                |          |      | 0.79  | 92.50                 | 91.23                 | 91.24                 | 0.835 | 3.427 | 3.393   | 0.00159  |          |          |          |   |
|                                  | N      | 108.26            | 118.41 | 128.75 | 97.07               | 7.07  | 2.095     | 0.03173  | -1.99015 | 0.56372        | -0.51992 | 1    | 2.79  | 96.30                 | 94.79                 | 99.60                 | 2.426 | 4.197 | 1.052   | 0.02925  | -1.97344 | 0.57791  | -0.56337 | 1 |
|                                  | N'     | 108.26            | 118.41 | 128.75 | 97.07               | 7.07  | 2.095     | 0.03173  | 1.99015  | -0.56372       | 0.51992  | 1    | 2.79  | 96.30                 | 94.79                 | 99.60                 | 2.426 | 4.197 | 1.052   | 0.02925  | 1.97344  | -0.57791 | 0.56337  | 1 |
|                                  | <N>    | 108.26            | 118.41 | 128.75 | 97.07               | 7.07  | 2.095     | 0.03173  |          |                |          |      | 2.79  | 96.30                 | 94.79                 | 99.60                 | 2.426 | 4.197 | 1.052   | 0.02925  |          |          |          |   |
|                                  | C3     | 126.51            | 128.71 | 104.78 | 90.23               | 0.23  | 2.000     | 0.00003  | 0.28088  | -1.28543       | -1.88521 | 1    | 0.13  | 90.15                 | 90.36                 | 90.15                 | 4.120 | 0.686 | 3.729   | 0.00003  | 0.27871  | -1.28532 | -1.88463 | 1 |
|                                  | C3'    | 126.51            | 128.71 | 104.78 | 90.23               | 0.23  | 2.000     | 0.00003  | -0.28088 | 1.28543        | 1.88521  | 1    | 0.13  | 90.15                 | 90.36                 | 90.15                 | 4.120 | 0.686 | 3.729   | 0.00003  | -0.27871 | 1.28532  | 1.88463  | 1 |
|                                  | <C3>   | 126.51            | 128.71 | 104.78 | 90.23               | 0.23  | 2.000     | 0.00003  |          |                |          |      | 0.13  | 90.15                 | 90.36                 | 90.15                 | 4.120 | 0.686 | 3.729   | 0.00003  |          |          |          |   |
|                                  | C8     | 118.01            | 119.22 | 122.07 | 92.77               | 2.77  | 2.014     | 0.00470  | -2.54708 | -0.35130       | 0.83812  | 1    | 0.20  | 92.80                 | 92.58                 | 92.91                 | 1.957 | 2.316 | 1.812   | 0.00468  | -2.54412 | -0.35017 | 0.83666  | 1 |
| C8'                              | 118.01 | 119.22            | 122.07 | 92.77  | 2.77                | 2.014 | 0.00470   | 2.54708  | 0.35130  | -0.83812       | 1        | 0.20 | 92.80 | 92.58                 | 92.91                 | 1.957                 | 2.316 | 1.812 | 0.00468 | 2.54412  | 0.35017  | -0.83666 | 1        |   |
| <C8>                             | 118.01 | 119.22            | 122.07 | 92.77  | 2.77                | 2.014 | 0.00470   |          |          |                |          | 0.20 | 92.80 | 92.58                 | 92.91                 | 1.957                 | 2.316 | 1.812 | 0.00468 |          |          |          |          |   |
| $N,N'$ -DiAc Indigo $C_2$ -sym.  | C2     | 124.09            | 107.98 | 125.22 | 95.44               | 5.44  | 2.056     | 0.01851  | -0.36561 | 0.71584        | 1.28497  | 1    | 2.22  | 97.66                 | 94.09                 | 94.21                 | 0.955 | 3.333 | 3.150   | 0.01697  | -0.37439 | 0.75325  | 1.28030  | 1 |
|                                  | C2'    | 124.09            | 107.98 | 125.22 | 95.44               | 5.44  | 2.056     | 0.01851  | 0.36561  | -0.71584       | 1.28497  | 1    | 2.22  | 97.66                 | 94.09                 | 94.21                 | 0.955 | 3.333 | 3.150   | 0.01697  | 0.37439  | -0.75325 | 1.28030  | 1 |
|                                  | <C2>   | 124.09            | 107.98 | 125.22 | 95.44               | 5.44  | 2.056     | 0.01851  |          |                |          |      | 2.22  | 97.66                 | 94.09                 | 94.21                 | 0.955 | 3.333 | 3.150   | 0.01697  |          |          |          |   |
|                                  | N      | 108.43            | 121.67 | 128.49 | 93.91               | 3.91  | 2.028     | 0.00941  | 1.26223  | 1.40021        | -0.49993 | 1    | 1.57  | 93.26                 | 92.75                 | 95.43                 | 2.668 | 3.749 | 0.968   | 0.00865  | 1.23947  | 1.40632  | -0.51398 | 1 |
|                                  | N'     | 108.43            | 121.67 | 128.49 | 93.91               | 3.91  | 2.028     | 0.00941  | -1.26223 | -1.40021       | -0.49993 | 1    | 1.57  | 93.26                 | 92.75                 | 95.43                 | 2.668 | 3.749 | 0.968   | 0.00865  | -1.23947 | -1.40632 | -0.51398 | 1 |
|                                  | <N>    | 108.43            | 121.67 | 128.49 | 93.91               | 3.91  | 2.028     | 0.00941  |          |                |          |      | 1.57  | 93.26                 | 92.75                 | 95.43                 | 2.668 | 3.749 | 0.968   | 0.00865  |          |          |          |   |
|                                  | C3     | 126.92            | 128.70 | 104.21 | 91.35               | 1.35  | 2.003     | 0.00111  | -1.67700 | 1.55869        | 0.76054  | 1    | 0.80  | 90.84                 | 92.14                 | 90.88                 | 4.239 | 0.654 | 3.914   | 0.00091  | -1.66448 | 1.56467  | 0.76149  | 1 |
|                                  | C3'    | 126.92            | 128.70 | 104.21 | 91.35               | 1.35  | 2.003     | 0.00111  | 1.67700  | -1.55869       | 0.76054  | 1    | 0.80  | 90.84                 | 92.14                 | 90.88                 | 4.239 | 0.654 | 3.914   | 0.00091  | 1.66448  | -1.56467 | 0.76149  | 1 |
|                                  | <C3>   | 126.92            | 128.70 | 104.21 | 91.35               | 1.35  | 2.003     | 0.00111  |          |                |          |      | 0.80  | 90.84                 | 92.14                 | 90.88                 | 4.239 | 0.654 | 3.914   | 0.00091  |          |          |          |   |
|                                  | C8     | 118.80            | 119.67 | 121.22 | 91.85               | 1.85  | 2.006     | 0.00208  | 2.48586  | 1.15871        | 0.44552  | 1    | 0.08  | 91.86                 | 91.77                 | 91.91                 | 1.982 | 2.174 | 1.878   | 0.00208  | 2.48465  | 1.15823  | 0.44509  | 1 |
| C8'                              | 118.80 | 119.67            | 121.22 | 91.85  | 1.85                | 2.006 | 0.00208   | -2.48586 | -1.15871 | 0.44552        | 1        | 0.08 | 91.86 | 91.77                 | 91.91                 | 1.982                 | 2.174 | 1.878 | 0.00208 | -2.48465 | -1.15823 | 0.44509  | 1        |   |
| <C8>                             | 118.80 | 119.67            | 121.22 | 91.85  | 1.85                | 2.006 | 0.00208   |          |          |                |          | 0.08 | 91.86 | 91.77                 | 91.91                 | 1.982                 | 2.174 | 1.878 | 0.00208 |          |          |          |          |   |
| 5,5'-DiPhEt- $N,N'$ -DiAc Indigo | C2     | 124.06            | 107.98 | 125.17 | 95.52               | 5.52  | 2.057     | 0.01906  | 0.80244  | 2.44121        | -0.07639 | 1    | 2.25  | 97.77                 | 94.15                 | 94.27                 | 0.957 | 3.333 | 3.150   | 0.01748  | 0.84091  | 2.43642  | -0.07053 | 1 |
|                                  | C2'    | 124.05            | 107.98 | 125.17 | 95.52               | 5.52  | 2.057     | 0.01907  | -0.80236 | 2.44133        | 0.07764  | 1    | 2.25  | 97.77                 | 94.15                 | 94.27                 | 0.957 | 3.333 | 3.149   | 0.01749  | -0.84083 | 2.43655  | 0.07179  | 1 |
|                                  | <C2>   | 124.05            | 107.98 | 125.17 | 95.52               | 5.52  | 2.057     | 0.01906  |          |                |          |      | 2.25  | 97.77                 | 94.15                 | 94.27                 | 0.957 | 3.333 | 3.150   | 0.01748  |          |          |          |   |
|                                  | N      | 108.38            | 121.67 | 128.60 | 93.84               | 3.84  | 2.027     | 0.00908  | 0.82764  | 0.65976        | 1.69303  | 1    | 1.55  | 93.20                 | 92.70                 | 95.34                 | 2.669 | 3.769 | 0.963   | 0.00834  | 0.84162  | 0.64581  | 1.67442  | 1 |
|                                  | N'     | 108.38            | 121.67 | 128.59 | 93.84               | 3.84  | 2.027     | 0.00908  | -0.82778 | 0.66094        | -1.69277 | 1    | 1.56  | 93.20                 | 92.70                 | 95.34                 | 2.669 | 3.769 | 0.963   | 0.00834  | -0.84176 | 0.64697  | -1.67416 | 1 |
|                                  | <N>    | 108.38            | 121.67 | 128.60 | 93.84               | 3.84  | 2.027     | 0.00908  |          |                |          |      | 1.56  | 93.20                 | 92.70                 | 95.34                 | 2.669 | 3.769 | 0.963   | 0.00834  |          |          |          |   |
|                                  | C3     | 126.90            | 128.74 | 104.20 | 91.32               | 1.32  | 2.003     | 0.00107  | 2.07205  | 1.90863        | -0.97898 | 1    | 0.78  | 90.82                 | 92.11                 | 90.86                 | 4.249 | 0.653 | 3.913   | 0.00088  | 2.07292  | 1.90961  | -0.96537 | 1 |
|                                  | C3'    | 126.91            | 128.73 | 104.19 | 91.33               | 1.33  | 2.003     | 0.00109  | -2.07213 | 1.90836        | 0.98015  | 1    | 0.79  | 90.83                 | 92.12                 | 90.87                 | 4.248 | 0.653 | 3.915   | 0.00090  | -2.07302 | 1.90936  | 0.96643  | 1 |
|                                  | <C3>   | 126.91            | 128.73 | 104.19 | 91.33               | 1.33  | 2.003     | 0.00108  |          |                |          |      | 0.79  | 90.83                 | 92.11                 | 90.86                 | 4.249 | 0.653 | 3.914   | 0.00089  |          |          |          |   |
|                                  | C8     | 118.84            | 119.64 | 121.22 | 91.83               | 1.83  | 2.006     | 0.00204  | 0.15730  | 1.59979        | 2.74314  | 1    | 0.08  | 91.84                 | 91.76                 | 91.89                 | 1.978 | 2.173 | 1.882   | 0.00204  | 0.15733  | 1.59936  | 2.74187  | 1 |
| C8'                              | 118.84 | 119.65            | 121.21 | 91.82  | 1.82                | 2.006 | 0.00203   | -0.15741 | 1.60157  | -2.74211       | 1        | 0.08 | 91.83 | 91.75                 | 91.88                 | 1.979                 | 2.171 | 1.882 | 0.00202 | -0.15744 | 1.60114  | -2.74086 | 1        |   |
| <C8>                             | 118.84 | 119.64            | 121.21 | 91.83  | 1.83                | 2.006 | 0.00204   |          |          |                |          | 0.08 | 91.84 | 91.75                 | 91.88                 | 1.979                 | 2.172 | 1.882 | 0.00203 |          |          |          |          |   |

Continuation Table 10

| Structure                                   | Center | POAV1             |        |        |                      |                     |           |         |          |          |          |   | POAV2          |                       |                       |                       |                     |       |       |         |          |          |          |   |
|---------------------------------------------|--------|-------------------|--------|--------|----------------------|---------------------|-----------|---------|----------|----------|----------|---|----------------|-----------------------|-----------------------|-----------------------|---------------------|-------|-------|---------|----------|----------|----------|---|
|                                             |        | neighboring atoms |        |        |                      | dummy atom position |           |         |          |          |          |   | angles, degree |                       |                       |                       | dummy atom position |       |       |         |          |          |          |   |
|                                             |        | angles, degree    |        |        | $\theta_{\sigma\pi}$ | Pyr.                | $\bar{n}$ | $m$     | x        | y        | z        | r | POAV1          | $\theta_{\sigma1\pi}$ | $\theta_{\sigma2\pi}$ | $\theta_{\sigma3\pi}$ | $n_1$               | $n_2$ | $n_3$ | $m$     | x        | y        | z        | r |
| <b>5,5'-DiPhOMe-<i>N,N'</i>-DiAc Indigo</b> | C2     | 124.11            | 107.97 | 125.21 |                      |                     |           |         |          |          |          |   |                |                       |                       |                       |                     |       |       |         |          |          |          |   |
|                                             | C2'    | 124.11            | 107.97 | 125.21 | 95.44                | 5.44                | 2.056     | 0.01850 | -0.80079 | -2.48255 | -0.07780 | 1 | 2.22           | 97.66                 | 94.09                 | 94.21                 | 0.954               | 3.332 | 3.152 | 0.01696 | -0.83880 | -2.47789 | -0.07207 | 1 |
|                                             | (C2)   | 124.11            | 107.97 | 125.21 | 95.44                | 5.44                | 2.055     | 0.01848 |          |          |          |   | 2.22           | 97.66                 | 94.09                 | 94.20                 | 0.954               | 3.332 | 3.153 | 0.01694 |          |          |          |   |
|                                             | N      | 108.38            | 121.61 | 128.61 | 93.89                | 3.89                | 2.028     | 0.00934 | 0.83686  | -0.70117 | -1.69150 | 1 | 1.58           | 93.25                 | 92.73                 | 95.41                 | 2.663               | 3.775 | 0.964 | 0.00857 | 0.85111  | -0.68710 | -1.67265 | 1 |
|                                             | N'     | 108.38            | 121.62 | 128.60 | 93.89                | 3.89                | 2.028     | 0.00934 | -0.83690 | -0.70073 | 1.69149  | 1 | 1.57           | 93.25                 | 92.73                 | 95.41                 | 2.664               | 3.774 | 0.964 | 0.00857 | -0.85115 | -0.68668 | 1.67265  | 1 |
|                                             | (N)    | 108.38            | 121.61 | 128.61 | 93.89                | 3.89                | 2.028     | 0.00934 |          |          |          |   | 1.58           | 93.25                 | 92.73                 | 95.41                 | 2.664               | 3.775 | 0.964 | 0.00857 |          |          |          |   |
|                                             | C3     | 126.89            | 128.72 | 104.23 | 91.30                | 1.30                | 2.003     | 0.00103 | 2.06543  | -1.95546 | 0.98645  | 1 | 0.77           | 90.81                 | 92.07                 | 90.85                 | 4.239               | 0.655 | 3.902 | 0.00085 | 2.06633  | -1.95646 | 0.97312  | 1 |
|                                             | C3'    | 126.89            | 128.72 | 104.23 | 91.30                | 1.30                | 2.003     | 0.00103 | -2.06543 | -1.95578 | -0.98618 | 1 | 0.77           | 90.81                 | 92.07                 | 90.85                 | 4.239               | 0.655 | 3.903 | 0.00085 | -2.06633 | -1.95678 | -0.97284 | 1 |
|                                             | (C3)   | 126.89            | 128.72 | 104.23 | 91.30                | 1.30                | 2.003     | 0.00103 |          |          |          |   | 0.77           | 90.81                 | 92.07                 | 90.85                 | 4.239               | 0.655 | 3.903 | 0.00085 |          |          |          |   |
|                                             | C8     | 118.86            | 119.65 | 121.19 | 91.84                | 1.84                | 2.006     | 0.00207 | 0.16181  | -1.64122 | -2.74129 | 1 | 0.08           | 91.85                 | 91.77                 | 91.90                 | 1.979               | 2.169 | 1.884 | 0.00206 | 0.16183  | -1.64079 | -2.74004 | 1 |
|                                             | C8'    | 118.86            | 119.64 | 121.19 | 91.84                | 1.84                | 2.006     | 0.00208 | -0.16161 | -1.64044 | 2.74156  | 1 | 0.08           | 91.86                 | 91.77                 | 91.90                 | 1.979               | 2.169 | 1.885 | 0.00208 | -0.16164 | -1.64001 | 2.74031  | 1 |
|                                             | (C8)   | 118.86            | 119.64 | 121.19 | 91.84                | 1.84                | 2.006     | 0.00207 |          |          |          |   | 0.08           | 91.85                 | 91.77                 | 91.90                 | 1.979               | 2.169 | 1.884 | 0.00207 |          |          |          |   |
| <b>6,6'-DiPhEt-<i>N,N'</i>-DiAc Indigo</b>  | C2     | 124.19            | 108.03 | 125.08 | 95.43                | 5.43                | 2.055     | 0.01839 | 0.65198  | 0.46930  | 2.00998  | 1 | 2.20           | 97.63                 | 94.10                 | 94.19                 | 0.958               | 3.305 | 3.159 | 0.01688 | 0.68750  | 0.48312  | 2.00545  | 1 |
|                                             | C2'    | 124.19            | 108.03 | 125.08 | 95.43                | 5.43                | 2.055     | 0.01838 | -0.65259 | -0.46913 | 2.00979  | 1 | 2.20           | 97.63                 | 94.10                 | 94.19                 | 0.958               | 3.305 | 3.159 | 0.01687 | -0.68811 | -0.48296 | 2.00525  | 1 |
|                                             | (C2)   | 124.19            | 108.03 | 125.08 | 95.43                | 5.43                | 2.055     | 0.01839 |          |          |          |   | 2.20           | 97.63                 | 94.10                 | 94.19                 | 0.958               | 3.305 | 3.159 | 0.01687 |          |          |          |   |
|                                             | N      | 108.31            | 121.69 | 128.36 | 94.22                | 4.22                | 2.033     | 0.01101 | 1.57093  | -1.05472 | 0.23555  | 1 | 1.71           | 93.51                 | 92.97                 | 95.88                 | 2.695               | 3.761 | 0.963 | 0.01010 | 1.57363  | -1.02936 | 0.21997  | 1 |
|                                             | N'     | 108.30            | 121.70 | 128.36 | 94.22                | 4.22                | 2.033     | 0.01100 | -1.57098 | 1.05474  | 0.23497  | 1 | 1.71           | 93.51                 | 92.97                 | 95.88                 | 2.696               | 3.761 | 0.963 | 0.01010 | -1.57367 | 1.02937  | 0.21940  | 1 |
|                                             | (N)    | 108.30            | 121.69 | 128.36 | 94.22                | 4.22                | 2.033     | 0.01101 |          |          |          |   | 1.71           | 93.51                 | 92.97                 | 95.88                 | 2.696               | 3.761 | 0.963 | 0.01010 |          |          |          |   |
|                                             | C3     | 126.89            | 128.84 | 104.09 | 91.38                | 1.38                | 2.003     | 0.00116 | 1.29704  | 1.88945  | 1.48376  | 1 | 0.82           | 90.85                 | 92.20                 | 90.89                 | 4.290               | 0.647 | 3.931 | 0.00095 | 1.30500  | 1.87755  | 1.48474  | 1 |
|                                             | C3'    | 126.89            | 128.84 | 104.10 | 91.38                | 1.38                | 2.003     | 0.00116 | -1.29745 | -1.88935 | 1.48350  | 1 | 0.82           | 90.86                 | 92.20                 | 90.89                 | 4.289               | 0.647 | 3.930 | 0.00096 | -1.30543 | -1.87743 | 1.48448  | 1 |
|                                             | (C3)   | 126.89            | 128.84 | 104.10 | 91.38                | 1.38                | 2.003     | 0.00116 |          |          |          |   | 0.82           | 90.85                 | 92.20                 | 90.89                 | 4.290               | 0.647 | 3.930 | 0.00095 |          |          |          |   |
|                                             | C8     | 118.88            | 119.75 | 121.10 | 91.73                | 1.73                | 2.005     | 0.00182 | 1.52993  | -2.28758 | 1.19531  | 1 | 0.07           | 91.73                 | 91.67                 | 91.78                 | 1.989               | 2.155 | 1.885 | 0.00182 | 1.52933  | -2.28663 | 1.19496  | 1 |
|                                             | C8'    | 118.88            | 119.75 | 121.10 | 91.73                | 1.73                | 2.006     | 0.00184 | -1.53036 | 2.28780  | 1.19458  | 1 | 0.07           | 91.74                 | 91.67                 | 91.79                 | 1.989               | 2.156 | 1.884 | 0.00183 | -1.52976 | 2.28684  | 1.19423  | 1 |
|                                             | (C8)   | 118.88            | 119.75 | 121.10 | 91.73                | 1.73                | 2.005     | 0.00183 |          |          |          |   | 0.07           | 91.74                 | 91.67                 | 91.79                 | 1.989               | 2.155 | 1.884 | 0.00183 |          |          |          |   |
| <b>6,6'-DiPhOMe-<i>N,N'</i>-DiAc Indigo</b> | C2     | 124.36            | 108.00 | 125.00 | 95.37                | 5.37                | 2.054     | 0.01801 | 0.64575  | 2.14594  | -0.24530 | 1 | 2.19           | 97.56                 | 94.06                 | 94.13                 | 0.955               | 3.289 | 3.184 | 0.01652 | 0.68107  | 2.14325  | -0.25949 | 1 |
|                                             | C2'    | 124.19            | 108.01 | 125.20 | 95.33                | 5.33                | 2.053     | 0.01771 | -0.65036 | 2.03530  | 0.68916  | 1 | 2.17           | 97.50                 | 94.01                 | 94.12                 | 0.955               | 3.318 | 3.153 | 0.01624 | -0.68514 | 2.02917  | 0.70272  | 1 |
|                                             | (C2)   | 124.27            | 108.00 | 125.10 | 95.35                | 5.35                | 2.054     | 0.01786 |          |          |          |   | 2.18           | 97.53                 | 94.04                 | 94.12                 | 0.955               | 3.303 | 3.169 | 0.01638 |          |          |          |   |
|                                             | N      | 108.30            | 121.67 | 128.36 | 94.25                | 4.25                | 2.033     | 0.01117 | 1.58398  | 0.21002  | 1.05357  | 1 | 1.72           | 93.54                 | 92.99                 | 95.92                 | 2.695               | 3.764 | 0.964 | 0.01024 | 1.58654  | 0.19741  | 1.02636  | 1 |
|                                             | N'     | 108.29            | 121.65 | 128.37 | 94.28                | 4.28                | 2.034     | 0.01132 | -1.58285 | 0.43010  | -1.00511 | 1 | 1.74           | 93.56                 | 93.01                 | 95.96                 | 2.693               | 3.769 | 0.964 | 0.01039 | -1.58529 | 0.41163  | -0.98118 | 1 |
|                                             | (N)    | 108.30            | 121.66 | 128.37 | 94.26                | 4.26                | 2.034     | 0.01124 |          |          |          |   | 1.73           | 93.55                 | 93.00                 | 95.94                 | 2.694               | 3.767 | 0.964 | 0.01032 |          |          |          |   |
|                                             | C3     | 126.84            | 128.86 | 104.12 | 91.38                | 1.38                | 2.004     | 0.00117 | 1.27846  | 1.79538  | -1.72268 | 1 | 0.82           | 90.86                 | 92.21                 | 90.90                 | 4.288               | 0.649 | 3.917 | 0.00096 | 1.28652  | 1.79501  | -1.71079 | 1 |
|                                             | C3'    | 126.84            | 128.85 | 104.13 | 91.35                | 1.35                | 2.003     | 0.00112 | -1.27297 | 1.36057  | 2.05226  | 1 | 0.81           | 90.84                 | 92.16                 | 90.88                 | 4.286               | 0.649 | 3.916 | 0.00092 | -1.28091 | 1.36276  | 2.04085  | 1 |
|                                             | (C3)   | 126.84            | 128.86 | 104.13 | 91.37                | 1.37                | 2.003     | 0.00114 |          |          |          |   | 0.81           | 90.85                 | 92.18                 | 90.89                 | 4.287               | 0.649 | 3.916 | 0.00094 |          |          |          |   |
|                                             | C8     | 118.88            | 119.79 | 121.04 | 91.80                | 1.80                | 2.006     | 0.00198 | 1.54356  | 1.02656  | 2.38956  | 1 | 0.07           | 91.80                 | 91.74                 | 91.85                 | 1.995               | 2.149 | 1.885 | 0.00197 | 1.54293  | 1.02634  | 2.38858  | 1 |
|                                             | C8'    | 118.92            | 119.76 | 121.05 | 91.76                | 1.76                | 2.006     | 0.00190 | -1.55411 | 1.52165  | -2.12746 | 1 | 0.07           | 91.77                 | 91.70                 | 91.82                 | 1.990               | 2.149 | 1.889 | 0.00190 | -1.55351 | 1.52121  | -2.12657 | 1 |
|                                             | (C8)   | 118.90            | 119.77 | 121.04 | 91.78                | 1.78                | 2.006     | 0.00194 |          |          |          |   | 0.07           | 91.79                 | 91.72                 | 91.84                 | 1.993               | 2.149 | 1.887 | 0.00194 |          |          |          |   |

**Table 11:** Primary data of the POAV1 and POAV2 analysis for the X-ray crystallographic determined molecular structures of *N,N'*-diacetylindigo (published by Grimme)<sup>[6]</sup> and the 5,5'- and 6,6'-bis-substituted *N,N'*-diacetylindigo compounds **12** and **23**.

| Comp.                                                | Center        | POAV1             |                      |        |                     |       |         |          |          |                        |                        |                        | POAV2          |       |       |        |                     |       |         |          |          |           |           |   |
|------------------------------------------------------|---------------|-------------------|----------------------|--------|---------------------|-------|---------|----------|----------|------------------------|------------------------|------------------------|----------------|-------|-------|--------|---------------------|-------|---------|----------|----------|-----------|-----------|---|
|                                                      |               | neighboring atoms |                      |        | dummy atom position |       |         |          |          |                        |                        |                        | angles, degree |       |       |        | dummy atom position |       |         |          |          |           |           |   |
|                                                      |               | angles, degree    |                      |        | x                   | y     | z       | r        | POAV1    | $\theta_{\alpha 1\pi}$ | $\theta_{\alpha 2\pi}$ | $\theta_{\alpha 3\pi}$ | $n_1$          | $n_2$ | $n_3$ | $m$    | x                   | y     | z       | r        |          |           |           |   |
| $\theta_{12}$                                        | $\theta_{23}$ | $\theta_{31}$     | $\theta_{\alpha\pi}$ | Pyr.   | $\bar{n}$           | $m$   |         |          |          |                        |                        |                        |                |       |       |        |                     |       |         |          |          |           |           |   |
| <i>N,N'</i> -DiAc<br>Indigo <sup>[6]</sup><br>Grimme | C2            | 124.52            | 108.07               | 123.60 | 96.46               | 6.46  | 2.079   | 0.02632  | 8.42217  | 3.11937                | 8.03551                | 1                      | 2.55           | 99.01 | 95.04 | 94.92  | 0.989               | 3.149 | 3.302   | 0.02426  | 8.45932  | 3.13158   | 8.01416   | 1 |
|                                                      | C2'           | 125.42            | 107.42               | 124.56 | 95.33               | 5.33  | 2.053   | 0.01774  | 7.03531  | 2.43044                | 8.39943                | 1                      | 2.30           | 97.64 | 94.02 | 93.94  | 0.910               | 3.270 | 3.414   | 0.01608  | 6.99756  | 2.42371   | 8.41155   | 1 |
|                                                      | <C2>          | 124.97            | 107.74               | 124.08 | 95.90               | 5.90  | 2.066   | 0.02203  |          |                        |                        |                        | 2.43           | 98.32 | 94.53 | 94.43  | 0.950               | 3.209 | 3.358   | 0.02017  |          |           |           |   |
|                                                      | N             | 107.59            | 122.11               | 126.80 | 96.19               | 6.19  | 2.072   | 0.02406  | 7.82106  | 2.57005                | 5.65320                | 1                      | 2.60           | 94.96 | 94.40 | 98.74  | 2.936               | 3.730 | 0.949   | 0.02193  | 7.81903  | 2.61508   | 5.64837   | 1 |
|                                                      | N'            | 108.21            | 121.48               | 127.24 | 95.79               | 5.79  | 2.063   | 0.02098  | 5.89487  | 4.66915                | 8.10428                | 1                      | 2.30           | 94.80 | 94.14 | 98.03  | 2.760               | 3.708 | 0.989   | 0.01931  | 5.87312  | 4.64898   | 8.07714   | 1 |
|                                                      | <N>           | 107.90            | 121.79               | 127.02 | 95.99               | 5.99  | 2.068   | 0.02252  |          |                        |                        |                        | 2.45           | 94.88 | 94.27 | 98.39  | 2.848               | 3.719 | 0.969   | 0.02062  |          |           |           |   |
|                                                      | C3            | 126.71            | 129.37               | 103.42 | 92.28               | 2.28  | 2.010   | 0.00319  | 9.21620  | 4.58286                | 7.79759                | 1                      | 1.43           | 91.36 | 93.71 | 91.44  | 4.571               | 0.612 | 4.060   | 0.00257  | 9.22059  | 4.56380   | 7.78206   | 1 |
|                                                      | C3'           | 126.26            | 128.67               | 104.95 | 91.15               | 1.15  | 2.002   | 0.00080  | 5.86812  | 1.45561                | 7.81838                | 1                      | 0.64           | 90.74 | 91.79 | 90.78  | 4.096               | 0.698 | 3.669   | 0.00068  | 5.86608  | 1.46369   | 7.82582   | 1 |
|                                                      | <C3>          | 126.49            | 129.02               | 104.19 | 91.72               | 1.72  | 2.006   | 0.00200  |          |                        |                        |                        | 1.04           | 91.05 | 92.75 | 91.11  | 4.333               | 0.655 | 3.864   | 0.00162  |          |           |           |   |
|                                                      | C8            | 118.54            | 118.94               | 122.40 | 91.14               | 1.14  | 2.002   | 0.00079  | 8.08390  | 1.06087                | 5.93190                | 1                      | 0.08           | 91.17 | 91.05 | 91.18  | 1.890               | 2.318 | 1.843   | 0.00078  | 8.08346  | 1.06223   | 5.93194   | 1 |
| C8'                                                  | 117.78        | 119.40            | 122.59               | 91.59  | 1.59                | 2.005 | 0.00154 | 6.83397  | 5.20427  | 9.29136                | 1                      | 0.13                   | 91.60          | 91.46 | 91.69 | 1.955  | 2.354               | 1.763 | 0.00153 | 6.83394  | 5.20290  | 9.28947   | 1         |   |
| <C8>                                                 | 118.16        | 119.17            | 122.50               | 91.36  | 1.36                | 2.003 | 0.00116 |          |          |                        |                        | 0.11                   | 91.39          | 91.26 | 91.44 | 1.923  | 2.336               | 1.803 | 0.00116 |          |          |           |           |   |
| <b>12</b><br>5,5'-subst.                             | C2            | 124.03            | 107.64               | 124.91 | 96.11               | 6.11  | 2.070   | 0.02349  | 12.91833 | 71.57718               | 10.94217               | 1                      | 2.55           | 98.66 | 94.57 | 94.68  | 0.946               | 3.374 | 3.227   | 0.02145  | 12.93219 | 71.60857  | 10.91394  | 1 |
|                                                      | C2'           | 124.64            | 107.98               | 123.83 | 96.24               | 6.24  | 2.074   | 0.02451  | 12.43868 | 70.21342               | 11.65598               | 1                      | 2.50           | 98.74 | 94.83 | 94.73  | 0.976               | 3.173 | 3.308   | 0.02253  | 12.41539 | 70.18346  | 11.67757  | 1 |
|                                                      | <C2>          | 124.33            | 107.81               | 124.37 | 96.18               | 6.18  | 2.072   | 0.02400  |          |                        |                        |                        | 2.52           | 98.70 | 94.70 | 94.71  | 0.961               | 3.274 | 3.267   | 0.02199  |          |           |           |   |
|                                                      | N             | 108.53            | 122.60               | 128.41 | 92.23               | 2.23  | 2.009   | 0.00303  | 12.51651 | 70.52331               | 8.69723                | 1                      | 0.90           | 91.83 | 91.59 | 93.11  | 2.729               | 3.629 | 0.949   | 0.00279  | 12.50734 | 70.53597  | 8.69573   | 1 |
|                                                      | N'            | 108.04            | 122.76               | 128.24 | 93.21               | 3.21  | 2.019   | 0.00633  | 10.06826 | 70.99460               | 11.34552               | 1                      | 1.35           | 92.59 | 92.26 | 94.53  | 2.823               | 3.693 | 0.925   | 0.00577  | 10.06691 | 70.97439  | 11.33358  | 1 |
|                                                      | <N>           | 108.29            | 122.68               | 128.33 | 92.72               | 2.72  | 2.014   | 0.00468  |          |                        |                        |                        | 1.12           | 92.21 | 91.93 | 93.82  | 2.776               | 3.661 | 0.937   | 0.00428  |          |           |           |   |
|                                                      | C3            | 126.07            | 128.98               | 104.72 | 91.59               | 1.59  | 2.005   | 0.00154  | 12.39060 | 73.09209               | 10.54827               | 1                      | 0.90           | 91.00 | 92.49 | 91.07  | 4.206               | 0.686 | 3.685   | 0.00129  | 12.40094 | 73.08407  | 10.53954  | 1 |
|                                                      | C3'           | 126.24            | 128.85               | 104.66 | 91.64               | 1.64  | 2.005   | 0.00165  | 12.16078 | 68.60370               | 11.40890               | 1                      | 0.94           | 91.04 | 92.58 | 91.10  | 4.192               | 0.683 | 3.724   | 0.00138  | 12.15111 | 68.61248  | 11.41874  | 1 |
|                                                      | <C3>          | 126.15            | 128.91               | 104.69 | 91.62               | 1.62  | 2.005   | 0.00159  |          |                        |                        |                        | 0.92           | 91.02 | 92.53 | 91.09  | 4.199               | 0.684 | 3.704   | 0.00134  |          |           |           |   |
|                                                      | C8            | 117.53            | 119.00               | 122.88 | 92.57               | 2.57  | 2.012   | 0.00403  | 13.48982 | 69.32981               | 9.12114                | 1                      | 0.24           | 92.61 | 92.33 | 92.74  | 1.932               | 2.423 | 1.756   | 0.00401  | 13.48690 | 69.33251  | 9.12262   | 1 |
| C8'                                                  | 116.32        | 120.05            | 123.22               | 92.12  | 2.12                | 2.008 | 0.00275 | 10.46849 | 72.29762 | 12.18886               | 1                      | 0.26                   | 92.08          | 91.90 | 92.35 | 2.062  | 2.468               | 1.616 | 0.00273 | 10.47121 | 72.29520 | 12.18616  | 1         |   |
| <C8>                                                 | 116.92        | 119.52            | 123.05               | 92.34  | 2.34                | 2.010 | 0.00339 |          |          |                        |                        | 0.25                   | 92.35          | 92.12 | 92.55 | 1.997  | 2.446               | 1.686 | 0.00337 |          |          |           |           |   |
| <b>23</b><br>6,6'-subst.                             | C2            | 125.13            | 108.27               | 123.89 | 95.44               | 5.44  | 2.055   | 0.01846  | 49.57513 | 6.61039                | -14.47354              | 1                      | 2.15           | 97.58 | 94.26 | 94.12  | 0.977               | 3.090 | 3.292   | 0.01702  | 49.58717 | 6.58496   | -14.49829 | 1 |
|                                                      | C2'           | 125.85            | 108.12               | 123.06 | 95.70               | 5.70  | 2.061   | 0.02031  | 49.36012 | 7.96825                | -13.68789              | 1                      | 2.28           | 97.96 | 94.53 | 94.22  | 0.973               | 2.995 | 3.453   | 0.01868  | 49.35410 | 7.99299   | -13.65731 | 1 |
|                                                      | <C2>          | 125.49            | 108.19               | 123.47 | 95.57               | 5.57  | 2.058   | 0.01939  |          |                        |                        |                        | 2.21           | 97.77 | 94.39 | 94.17  | 0.975               | 3.043 | 3.373   | 0.01785  |          |           |           |   |
|                                                      | N             | 107.02            | 121.00               | 123.78 | 99.54               | 9.54  | 2.180   | 0.05992  | 51.77703 | 7.61165                | -15.24509              | 1                      | 3.88           | 97.57 | 97.01 | 103.40 | 3.164               | 3.687 | 1.022   | 0.05492  | 51.80371 | 7.56319   | -15.20596 | 1 |
|                                                      | N'            | 107.48            | 122.06               | 124.48 | 98.12               | 8.12  | 2.127   | 0.04240  | 50.40171 | 6.76757                | -11.71324              | 1                      | 3.28           | 96.41 | 96.01 | 101.38 | 3.121               | 3.550 | 1.000   | 0.03892  | 50.44318 | 6.80609   | -11.72179 | 1 |
|                                                      | <N>           | 107.25            | 121.53               | 124.13 | 98.83               | 8.83  | 2.153   | 0.05116  |          |                        |                        |                        | 3.58           | 96.99 | 96.51 | 102.39 | 3.143               | 3.618 | 1.011   | 0.04692  |          |           |           |   |
|                                                      | C3            | 127.14            | 128.60               | 104.01 | 91.66               | 1.66  | 2.005   | 0.00168  | 49.95339 | 5.00937                | -14.34430              | 1                      | 0.99           | 91.03 | 92.65 | 91.06  | 4.269               | 0.643 | 3.998   | 0.00138  | 49.95912 | 5.01844   | -14.35794 | 1 |
|                                                      | C3'           | 127.22            | 128.39               | 104.18 | 91.50               | 1.50  | 2.004   | 0.00138  | 49.90074 | 9.50331                | -13.42855              | 1                      | 0.89           | 90.94 | 92.39 | 90.97  | 4.191               | 0.652 | 3.977   | 0.00113  | 49.89556 | 9.49503   | -13.41649 | 1 |
|                                                      | <C3>          | 127.18            | 128.49               | 104.09 | 91.58               | 1.58  | 2.005   | 0.00153  |          |                        |                        |                        | 0.94           | 90.99 | 92.52 | 91.02  | 4.230               | 0.647 | 3.987   | 0.00125  |          |           |           |   |
|                                                      | C8            | 117.70            | 119.18               | 123.02 | 91.05               | 1.05  | 2.002   | 0.00067  | 50.86915 | 8.55931                | -16.19589              | 1                      | 0.10           | 91.06 | 90.95 | 91.12  | 1.924               | 2.404 | 1.750   | 0.00066  | 50.86958 | 8.55856   | -16.19441 | 1 |
| C8'                                                  | 117.53        | 119.76            | 122.48               | 91.61  | 1.61                | 2.005 | 0.00159 | 49.06390 | 5.87049  | -11.73359              | 1                      | 0.14                   | 91.61          | 91.49 | 91.73 | 2.000  | 2.340               | 1.734 | 0.00158 | 49.06552 | 5.87146  | -11.73513 | 1         |   |
| <C8>                                                 | 117.62        | 119.47            | 122.75               | 91.33  | 1.33                | 2.003 | 0.00113 |          |          |                        |                        | 0.12                   | 91.34          | 91.22 | 91.42 | 1.962  | 2.372               | 1.742 | 0.00112 |          |          |           |           |   |

**Table 12:** Intramolecular distances and angles in the computed  $C_i$  and  $C_2$  symmetric unsubstituted  $N,N'$ -diacetyl indigo and the X-ray crystallographic determined molecular structures of  $N,N'$ -diacetyl indigo (published by Grimme)<sup>[6]</sup> and the 5,5'- and 6,6'-bis-substituted  $N,N'$ -diacetyl indigo compounds **12** and **23** after introduction of the POAV1 and POAV2 dummy atoms.

| Dist./Angle/Dihedral          | Function                                             | $C_i$   | $C_2$   | Grimme <sup>[6]</sup> | <b>12</b> (5,5') | <b>23</b> (6,6') |
|-------------------------------|------------------------------------------------------|---------|---------|-----------------------|------------------|------------------|
| C2                            | Pyramidalization $\theta_{C_2}$ [°]<br>POAV1         |         |         | 6.46                  | 6.12             | 5.44             |
| C2'                           |                                                      |         |         | 5.33                  | 6.24             | 5.70             |
| Av.                           |                                                      | 1.71    | 5.45    | 5.90                  | 6.18             | 5.57             |
| N                             | Pyramidalization $\theta_N$ [°]<br>POAV1             |         |         | 6.19                  | 2.23             | 9.54             |
| N'                            |                                                      |         |         | 5.79                  | 3.21             | 8.12             |
| Av.                           |                                                      | 7.07    | 3.91    | 5.99                  | 2.72             | 8.83             |
| C3                            | Pyramidalization $\theta_{C_3}$ [°]<br>POAV1         |         |         | 2.29                  | 1.59             | 1.66             |
| C3'                           |                                                      |         |         | 1.15                  | 1.64             | 1.50             |
| Av.                           |                                                      | 0.23    | 1.35    | 1.72                  | 1.62             | 1.58             |
| C8                            | Pyramidalization $\theta_{C_8}$ [°]<br>POAV1         |         |         | 1.14                  | 2.57             | 1.05             |
| C8'                           |                                                      |         |         | 1.59                  | 2.12             | 1.61             |
| Av.                           |                                                      | 2.77    | 1.85    | 1.36                  | 2.34             | 1.33             |
| C2=C2'                        | Distance $d_{C_2-C_2'}$ [Å]                          | 1.362   | 1.364   | 1.349                 | 1.362            | 1.351            |
| C2-C3                         | Distance $d_{C_2-C_3}$ [Å]                           |         |         | 1.499                 | 1.504            | 1.503            |
| C2'-C3'                       |                                                      |         |         | 1.502                 | 1.493            | 1.497            |
| Av.                           |                                                      | 1.514   | 1.509   | 1.501                 | 1.499            | 1.500            |
| N-C7a                         | Distance $d_{N-C7a}$ [Å]                             |         |         | 1.426                 | 1.429            | 1.433            |
| N'-C7a'                       |                                                      |         |         | 1.426                 | 1.428            | 1.433            |
| Av.                           |                                                      | 1.427   | 1.429   | 1.426                 | 1.428            | 1.433            |
| N-C2                          | Distance $d_{N-C_2}$ [Å]                             |         |         | 1.414                 | 1.413            | 1.419            |
| N'-C2'                        |                                                      |         |         | 1.413                 | 1.413            | 1.417            |
| Av.                           |                                                      | 1.413   | 1.407   | 1.414                 | 1.413            | 1.418            |
| N-C8                          | Distance $d_{N-C_8}$ [Å]                             |         |         | 1.411                 | 1.418            | 1.418            |
| N'-C8'                        |                                                      |         |         | 1.412                 | 1.420            | 1.406            |
| Av.                           |                                                      | 1.438   | 1.424   | 1.411                 | 1.419            | 1.412            |
| C2(p)-C2-C2'-C2(p)'           | Twist $\Theta_{C_2-C_2'}$ [°] POAV1                  | 180.00  | -23.96  | -19.54                | -19.46           | -20.06           |
| C2(p)-C2-C2'-C2(p)'           | Twist $\Theta_{C_2-C_2'}$ [°] POAV2                  | 180.00  | -24.15  | -19.37                | -19.46           | -19.71           |
| C3(p)-C3-C2-C2(p)             | p-orbital overlap<br>$\Theta_{C_2-C_3}$ [°]<br>POAV1 | 12.18   | 13.59   | 18.39                 | 12.25            | 16.11            |
| C3(p)'-C3'-C2'-C2(p)'         |                                                      | -12.18  | 13.59   | 11.78                 | 15.33            | 16.59            |
| Av.                           |                                                      | ±12.18  | 13.59   | 15.09                 | 13.79            | 16.35            |
| C3(p)-C3-C2-C2(p)             | p-orbital overlap<br>$\Theta_{C_2-C_3}$ [°]<br>POAV2 | 11.64   | 12.44   | 17.36                 | 10.90            | 15.09            |
| C3(p)'-C3'-C2'-C2(p)'         |                                                      | -11.64  | 12.44   | 10.37                 | 13.97            | 15.32            |
| Av.                           |                                                      | ±11.64  | 12.44   | 13.87                 | 12.44            | 15.21            |
| N(p)-N-C2-C2(p)               | p-orbital overlap<br>$\Theta_{C_2-N}$ [°]<br>POAV1   | 155.78  | 158.77  | 148.97                | 162.67           | 147.82           |
| N(p)'-N'-C2'-C2(p)'           |                                                      | -155.78 | 158.77  | 158.10                | 158.89           | 150.15           |
| Av.                           |                                                      | ±155.78 | 158.77  | 153.54                | 160.78           | 148.99           |
| N(p)-N-C2-C2(p)               | p-orbital overlap<br>$\Theta_{C_2-N}$ [°]<br>POAV2   | 159.12  | 162.06  | 153.31                | 165.59           | 152.91           |
| N(p)'-N'-C2'-C2(p)'           |                                                      | -159.12 | 162.06  | 162.03                | 162.01           | 154.72           |
| Av.                           |                                                      | ±159.12 | -162.06 | 157.67                | 163.80           | 153.82           |
| N(p)-N-C8-C8(p)               | p-orbital overlap<br>$\Theta_{N-C_8}$ [°]<br>POAV1   | -37.15  | -20.58  | -13.81                | -31.66           | -14.10           |
| N(p)'-N'-C8'-C8(p)'           |                                                      | 37.15   | -20.58  | -26.18                | -30.70           | -19.37           |
| Av.                           |                                                      | ±37.15  | -20.58  | -20.00                | -31.18           | -16.74           |
| N(p)-N-C8-C8(p)               | p-orbital overlap<br>$\Theta_{N-C_8}$ [°]<br>POAV2   | -38.40  | -21.02  | -14.27                | -31.92           | -14.59           |
| N(p)'-N'-C8'-C8(p)'           |                                                      | 38.40   | -21.02  | -26.70                | -31.11           | -19.76           |
| Av.                           |                                                      | ±38.40  | -21.02  | -20.49                | -31.52           | -17.18           |
| Ln (5/6-5'/6') to Ln(2-2')    | Skew $\sigma$ [°]                                    | 11.63   | 4.28    | 7.37                  | 3.91             | 5.86             |
| Tor: 5-6-5'-6'                | Effective ring twist $\alpha$ [°]                    | 0.00    | -24.67  | -19.17                | -26.05           | -18.68           |
| Ln (5-7a) to Ln (5'-7a')      | Specific bent $\beta_{C_5}$ [°]                      | 0.00    | 49.14   | 52.90                 | 50.60            | 54.29            |
| Ln (3a-6) to Ln (3a'-6')      | Specific bent $\beta_{C_6}$ [°]                      | 0.00    | 23.45   | 32.44                 | 26.11            | 32.41            |
| Ln(5/6-3a/7a) to Ln(2-2')     |                                                      | 15.12   | 21.83   | 34.53                 | 22.13            | 26.34            |
| Ln(5'/6'-3a'/7a') to Ln(2-2') |                                                      | -15.12  | 21.83   | 16.91                 | 23.58            | 26.56            |
| Sum                           | Overall bent $\gamma$                                | 0       | 43.65   | 51.44                 | 45.71            | 52.90            |

“p” denotes the POAV dummy atom of the appendent atom. “Ln” denotes a line which was defined to pass through the specified atoms. X/Y indicates that the centre between X and Y. The angle between the lines was determined using the Diamond 3 software from *Crystal Impact*.

**Table 13:** Intramolecular distances and angles in the computed  $C_2$  symmetric molecular structures of 5,5'- and 6,6'-bis-substituted  $N,N'$ -diacetyl indigo compounds with 4-ethylphenyl (PhEt) and 4-methoxyphenyl (PhOMe) substituents after introduction of the POAV1 and POAV2 dummy atoms.

| Dist./Angle/Dihedral          | Function                                    | 5,5'-DiPhEt | 5,5'-DiPhOMe | 6,6'-DiPhEt | 6,6'-DiPhOMe |
|-------------------------------|---------------------------------------------|-------------|--------------|-------------|--------------|
| C2                            | Pyramidalization $\theta_{C2}$ [°]<br>POAV1 | 5.52        | 5.44         | 5.43        | 5.37         |
| C2'                           |                                             | 5.52        | 5.44         | 5.43        | 5.33         |
| Av.                           |                                             | 5.52        | 5.44         | 5.43        | 5.35         |
| N                             | Pyramidalization $\theta_N$ [°]<br>POAV1    | 3.84        | 3.89         | 4.22        | 4.25         |
| N'                            |                                             | 3.84        | 3.89         | 4.22        | 4.28         |
| Av.                           |                                             | 3.84        | 3.89         | 4.22        | 4.26         |
| C3                            | Pyramidalization $\theta_{C3}$ [°]<br>POAV1 | 1.32        | 1.30         | 1.38        | 1.38         |
| C3'                           |                                             | 1.33        | 1.30         | 1.38        | 1.35         |
| Av.                           |                                             | 1.33        | 1.30         | 1.38        | 1.37         |
| C8                            | Pyramidalization $\theta_{C8}$ [°]<br>POAV1 | 1.83        | 1.84         | 1.73        | 1.80         |
| C8'                           |                                             | 1.82        | 1.84         | 1.73        | 1.76         |
| Av.                           |                                             | 1.83        | 1.84         | 1.73        | 1.78         |
| C2=C2'                        | Distance $d_{C2-C2'}$ [Å]                   | 1.364       | 1.364        | 1.363       | 1.363        |
| C2-C3                         | Distance $d_{C2-C3}$ [Å]                    |             |              |             |              |
| C2'-C3'                       |                                             |             |              |             |              |
| Av.                           |                                             | 1.510       | 1.510        | 1.510       | 1.510        |
| N-C7a                         | Distance $d_{N-C7a}$ [Å]                    |             |              |             |              |
| N'-C7a'                       |                                             |             |              |             |              |
| Av.                           |                                             | 1.428       | 1.428        | 1.429       | 1.429        |
| N-C2                          | Distance $d_{N-C2}$ [Å]                     |             |              |             |              |
| N'-C2'                        |                                             |             |              |             |              |
| Av.                           |                                             | 1.407       | 1.407        | 1.409       | 1.409        |
| N-C8                          | Distance $d_{N-C8}$ [Å]                     |             |              |             |              |
| N'-C8'                        |                                             |             |              |             |              |
| Av.                           |                                             | 1.423       | 1.422        | 1.422       | 1.422        |
| C2(p)-C2-C2'-C2(p)'           | Twist $\Theta_{C2-C2'}$ [°] POAV1           | -24.40      | -24.34       | -24.15      | -23.55       |
| C2(p)-C2-C2'-C2(p)'           | Twist $\Theta_{C2-C2'}$ [°] POAV2           | -24.60      | -24.53       | -24.30      | -23.69       |
| C3(p)-C3-C2-C2(p)             | p-orbital overlap                           |             |              |             | 13.61        |
| C3(p)-C3'-C2'-C2(p)'          | $\Theta_{C2-C3}$ [°]<br>POAV1               |             |              |             | 13.55        |
| Av.                           |                                             | 13.62       | 13.28        | 13.79       | 13.58        |
| C3(p)-C3-C2-C2(p)             | p-orbital overlap                           |             |              |             | 12.44        |
| C3(p)-C3'-C2'-C2(p)'          | $\Theta_{C2-C3}$ [°]<br>POAV2               |             |              |             | 12.49        |
| Av.                           |                                             | 12.44       | 12.11        | 12.66       | 12.47        |
| N(p)-N-C2-C2(p)               | p-orbital overlap                           |             |              |             | 158.29       |
| N(p)-N'-C2'-C2(p)'            | $\Theta_{C2-N}$ [°]<br>POAV1                |             |              |             | 158.09       |
| Av.                           |                                             | 158.80      | 159.04       | 158.17      | 158.19       |
| N(p)-N-C2-C2(p)               | p-orbital overlap                           |             |              |             | 161.67       |
| N(p)-N'-C2'-C2(p)'            | $\Theta_{C2-N}$ [°]<br>POAV2                |             |              |             | 161.47       |
| Av.                           |                                             | 162.10      | 162.33       | 161.55      | 161.57       |
| N(p)-N-C8-C8(p)               | p-orbital overlap                           |             |              |             | -20.03       |
| N(p)-N'-C8'-C8(p)'            | $\Theta_{N-C8}$ [°]<br>POAV1                |             |              |             | -20.15       |
| Av.                           |                                             | -20.04      | -20.31       | -19.60      | -20.09       |
| N(p)-N-C8-C8(p)               | p-orbital overlap                           |             |              |             | -20.50       |
| N(p)-N'-C8'-C8(p)'            | $\Theta_{N-C8}$ [°]<br>POAV2                |             |              |             | -20.61       |
| Av.                           |                                             | -20.48      | -20.75       | -20.06      | -20.55       |
| Ln (5/6-5'/6') to Ln(2-2')    | Skew $\sigma$ [°]                           | 4.20        | 4.06         | 4.69        | 4.59         |
| Tor: 5-6-5'-6'                | Effective ring twist $\alpha$ [°]           | -26.08      | -25.80       | -23.95      | -22.59       |
| Ln (5-7a) to Ln (5'-7a')      | Specific bent $\beta_{C5}$ [°]              | 49.97       | 48.54        | 50.07       | 49.01        |
| Ln (3a-6) to Ln (3a'-6')      | Specific bent $\beta_{C6}$ [°]              | 23.83       | 22.74        | 24.04       | 24.13        |
| Ln(5/6-3a/7a) to Ln(2-2')     |                                             | 22.15       | 21.38        | 22.39       | 21.91        |
| Ln(5'/6'-3a'/7a') to Ln(2-2') |                                             | 22.14       | 21.37        | 22.40       | 22.28        |
| Sum                           | Overall bent $\gamma$                       | 44.29       | 42.75        | 44.79       | 44.20        |

“p” denotes the POAV dummy atom of the appendant atom. “Ln” denotes a line which was defined to pass through the specified atoms. X/Y indicates that the centre between X and Y. The angle between the lines was determined using the Diamond 3 software from *Crystal Impact*.

## Reference:

- [1] G. W. Gray, C. Hogg, D. Lacey, *Mol. Cryst. Liq. Cryst.* **1981**, 67, 1.
- [2] P. Davidson, D. Petermann, A. M. Levelut, *J. Phys. II* **1995**, 5, 113.
- [3] M. J. Frisch, et al., Gaussian Inc., Wallingford CT, **2004**.
- [4] a) A. D. Becke, *J. Chem. Phys.* **1993**, 98, 5648; b) C. T. Lee, W. T. Yang, R. G. Parr, *Phys. Rev. B: Condens. Matter Mater. Phys.* **1988**, 37, 785; c) B. Miehlich, A. Savin, H. Stoll, H. Preuss, *Chem. Phys. Lett.* **1989**, 157, 200.
- [5] a) R. C. Haddon, *J. Am. Chem. Soc.* **1986**, 108, 2837; b) R. C. Haddon, *Accounts of Chemical Research* **1988**, 21, 243; c) R. C. Haddon, *J. Phys. Chem. A* **2001**, 105, 4164; d) R. C. Haddon, L. T. Scott, *Pure Appl. Chem.* **1986**, 58, 137.
- [6] G. Grimme, S. Grimme, P. G. Jones, P. Boldt, *Chem. Ber.* **1993**, 126, 1015.

Full reference for Gaussian 03 (Ref. 30 of the main article):

Gaussian 03, Revision D.02, M. J. Frisch, G. W. Trucks, H. B. Schlegel, G. E. Scuseria, M. A. Robb, J. R. Cheeseman, J. A. Montgomery, Jr., T. Vreven, K. N. Kudin, J. C. Burant, J. M. Millam, S. S. Iyengar, J. Tomasi, V. Barone, B. Mennucci, M. Cossi, G. Scalmani, N. Rega, G. A. Petersson, H. Nakatsuji, M. Hada, M. Ehara, K. Toyota, R. Fukuda, J. Hasegawa, M. Ishida, T. Nakajima, Y. Honda, O. Kitao, H. Nakai, M. Klene, X. Li, J. E. Knox, H. P. Hratchian, J. B. Cross, V. Bakken, C. Adamo, J. Jaramillo, R. Gomperts, R. E. Stratmann, O. Yazyev, A. J. Austin, R. Cammi, C. Pomelli, J. W. Ochterski, P. Y. Ayala, K. Morokuma, G. A. Voth, P. Salvador, J. J. Dannenberg, V. G. Zakrzewski, S. Dapprich, A. D. Daniels, M. C. Strain, O. Farkas, D. K. Malick, A. D. Rabuck, K. Raghavachari, J. B. Foresman, J. V. Ortiz, Q. Cui, A. G. Baboul, S. Clifford, J. Cioslowski, B. B. Stefanov, G. Liu, A. Liashenko, P. Piskorz, I. Komaromi, R. L. Martin, D. J. Fox, T. Keith, M. A. Al-Laham, C. Y. Peng, A. Nanayakkara, M. Challacombe, P. M. W. Gill, B. Johnson, W. Chen, M. W. Wong, C. Gonzalez, and J. A. Pople, Gaussian, Inc., Wallingford CT, 2004.
